# Supplementary material for: Neuropathic pain in the IMI-APPROACH knee osteoarthritis cohort: prevalence and phenotyping
Source: PubMed Central journal article supplement — RMD Open. 2021 Dec 15;7(3):e002025. doi: 10.1136/rmdopen-2021-002025 (PMC8679113; doi:10.1136/rmdopen-2021-002025), 2021-12-15
Supplement: rmdopen-2021-002025supp001.pdf [file rmdopen-2021-002025supp001.pdf]

---

|                                |                                                                                                                                                                                                                                                                                                                                            |
|--------------------------------|--------------------------------------------------------------------------------------------------------------------------------------------------------------------------------------------------------------------------------------------------------------------------------------------------------------------------------------------|
| <i>Document title</i>          | <b>CLINICAL STUDY PROTOCOL</b>                                                                                                                                                                                                                                                                                                             |
| <i>Study title</i>             | <b>Applied Public-Private Research enabling OsteoArthritis Clinical Headway study – a 2-year multicentre, European, exploratory study without therapeutic benefit in patients with knee osteoarthritis to describe, validate, and predict phenotypes of knee osteoarthritis by use of clinical, imaging, and biochemical (bio)markers.</b> |
|                                | <b>APPROACH study</b>                                                                                                                                                                                                                                                                                                                      |
| <i>Protocol code</i>           | <b>APPROACH-OA-P01</b>                                                                                                                                                                                                                                                                                                                     |
| <i>Sponsor</i>                 | <b>University Medical Center Utrecht (UMC Utrecht)<br/>Heidelberglaan 100<br/>3584 CX Utrecht,<br/>The Netherlands</b>                                                                                                                                                                                                                     |
| <i>Date of the document</i>    | <b>August 25, 2017</b>                                                                                                                                                                                                                                                                                                                     |
| <i>Version of the document</i> | <b>Final version – version 1.0_NL</b>                                                                                                                                                                                                                                                                                                      |

---

APPROACH Clinical study protocol- Final version V1.0\_NL

---

### Protocol signature sheet

| Name                                                                                                                                                                                            | Signature | Date |
|-------------------------------------------------------------------------------------------------------------------------------------------------------------------------------------------------|-----------|------|
| <b>Sponsor or legal representative:</b><br><b>Prof. F.P.J.G. Lafeber, PhD</b><br><b>Prof. in Experimental Rheumatology</b><br><b>Rheumatology &amp; Clin. Immunology</b><br><b>UMC Utrecht.</b> |           |      |
| <b>Sponsor Medical Expert:</b><br><b>W.E. van Spil, MD, PhD,</b><br><b>physician Rheumatology &amp; Clin.</b><br><b>Immunology UMC Utrecht.</b>                                                 |           |      |
| <b>Sponsor International Coordinator:</b><br><b>A.C.A. Marijnissen, PhD, coordinator</b><br><b>clinical studies at Rheumatology &amp; Clin.</b><br><b>Immunology UMC Utrecht.</b>               |           |      |
| <b>Principal Investigator clinical center:</b>                                                                                                                                                  |           |      |

*APPROACH Clinical study protocol- Final version V1.0\_NL***Table of contents**

|                                                                                    |           |
|------------------------------------------------------------------------------------|-----------|
| Protocol signature sheet .....                                                     | 2         |
| Table of contents .....                                                            | 3         |
| List of tables .....                                                               | 6         |
| List of figures .....                                                              | 7         |
| List of appendices.....                                                            | 8         |
| List of abbreviations .....                                                        | 9         |
| <b>1. ADMINISTRATIVE STRUCTURE OF THE STUDY .....</b>                              | <b>10</b> |
| <b>2. SUMMARY .....</b>                                                            | <b>10</b> |
| <b>3. BACKGROUND INFORMATION .....</b>                                             | <b>12</b> |
| <b>4. STUDY OBJECTIVES AND PURPOSE.....</b>                                        | <b>14</b> |
| <b>5. STUDY DESIGN .....</b>                                                       | <b>14</b> |
| 5.1. Endpoints and co-variables .....                                              | 14        |
| 5.1.1. Endpoints for description of the index knee OA progression phenotypes ..... | 14        |
| 5.1.2. Endpoints for prediction of index knee OA progression phenotypes.....       | 15        |
| 5.1.3. Co-variables.....                                                           | 16        |
| 5.2. Experimental design .....                                                     | 17        |
| 5.2.1. Study plan.....                                                             | 17        |
| 5.2.2. Investigation schedule .....                                                | 18        |
| 5.3. Premature discontinuation of the study .....                                  | 20        |
| 5.4. In case of TKR or surgery indication.....                                     | 20        |
| <b>6. STUDY POPULATION .....</b>                                                   | <b>21</b> |
| 6.1. Recruitment of the patients .....                                             | 21        |
| 6.2. Selection of the patients .....                                               | 22        |
| 6.2.1. Inclusion criteria determined at screening visit.....                       | 22        |
| 6.2.2. Exclusion criteria.....                                                     | 23        |
| 6.2.2.1. General exclusion criteria .....                                          | 23        |
| 6.2.2.2. Medical exclusion criteria.....                                           | 23        |
| 6.3. Participant withdrawal .....                                                  | 23        |
| 6.3.1. Withdrawal criteria .....                                                   | 23        |
| 6.3.2. Procedure.....                                                              | 24        |
| <b>7. STUDY PROCEDURES .....</b>                                                   | <b>24</b> |
| 7.1. Physical examination .....                                                    | 24        |
| 7.1.1. Knee physical examination.....                                              | 25        |
| 7.1.2. Hip and hand physical examination .....                                     | 25        |
| 7.2. Imaging with central reading .....                                            | 25        |
| 7.2.1. Radiographs.....                                                            | 26        |
| 7.2.1.1. Radiography acquisition protocol.....                                     | 26        |

*APPROACH Clinical study protocol- Final version V1.0\_NL*

|                                                                                                                |           |
|----------------------------------------------------------------------------------------------------------------|-----------|
| 7.2.1.2. Central reading of radiographic images.....                                                           | 26        |
| 7.2.2. Magnetic Resonance Imaging (MRI) of the knee .....                                                      | 26        |
| 7.2.2.1. MRI of the index knee – acquisition protocol .....                                                    | 26        |
| 7.2.2.2. Central reading of MRI exams .....                                                                    | 27        |
| 7.2.3. High resolution computed Tomography (CT) of the index knee and whole body<br>low dose CT (WBLDCT) ..... | 27        |
| 7.2.3.1. CT of index knee and whole body CT- acquisition protocols .....                                       | 27        |
| 7.2.3.2. Central reading of CT .....                                                                           | 27        |
| 7.3. HandScan .....                                                                                            | 28        |
| 7.4. Motion analysis.....                                                                                      | 28        |
| 7.5. Performance based test .....                                                                              | 28        |
| 7.6. Questionnaires .....                                                                                      | 29        |
| 7.6.1. Knee injury and Osteoarthritis Outcome Score (KOOS) .....                                               | 29        |
| 7.6.2. Hip disability and Osteoarthritis Outcome Score (HOOS) .....                                            | 29        |
| 7.6.3. Intermittent and constant OA pain questionnaire (ICOAP) for the knee and the<br>hip.....                | 29        |
| 7.6.4. FIHOA (Functional Index for Hand OsteoArthritis) for both hands.....                                    | 29        |
| 7.6.5. Numeric Rating Scale (NRS) for Pain for knees, hips, lower back and hands .....                         | 30        |
| 7.6.6. Pain detect .....                                                                                       | 30        |
| 7.6.7. Short Form (36) Health Survey (SF-36).....                                                              | 30        |
| 7.6.8. One month diary for pain intensity and pain medication taken.....                                       | 30        |
| 7.7. Biological samples.....                                                                                   | 30        |
| 7.7.1. Biochemical markers .....                                                                               | 31        |
| 7.7.2. Genomic (bio) markers.....                                                                              | 31        |
| 7.7.3. Sample storage.....                                                                                     | 31        |
| <b>8. SAFETY REPORTING .....</b>                                                                               | <b>32</b> |
| 8.1. Adverse events and serious adverse events .....                                                           | 32        |
| 8.1.1. Adverse events (AEs).....                                                                               | 32        |
| 8.1.2. Serious adverse events.....                                                                             | 32        |
| 8.2. Safety considerations for Radiograph, knee high resolution CT and WBLDCT<br>examinations .....            | 32        |
| 8.3. Safety considerations for MRI.....                                                                        | 33        |
| 8.4. Responsibilities of the investigator.....                                                                 | 33        |
| 8.5. Responsibilities of the sponsor .....                                                                     | 33        |
| <b>9. STATISTICS.....</b>                                                                                      | <b>34</b> |
| 9.1. Statistical analysis.....                                                                                 | 34        |
| 9.2. Determination of sample size .....                                                                        | 35        |
| <b>10. DIRECT ACCESS TO SOURCE DATA / DOCUMENTS .....</b>                                                      | <b>36</b> |
| <b>11. QUALITY CONTROL AND QUALITY ASSURANCE.....</b>                                                          | <b>36</b> |
| <b>12. ETHICAL CONSIDERATIONS.....</b>                                                                         | <b>37</b> |
| 12.1. Institutional Review Board(s)/Independent Ethics Committee(s).....                                       | 37        |
| 12.2. Study conduct .....                                                                                      | 37        |
| 12.3. Recruitment and informed consent .....                                                                   | 37        |

*APPROACH Clinical study protocol- Final version V1.0\_NL*

|                                                                                                        |           |
|--------------------------------------------------------------------------------------------------------|-----------|
| <b>13. DATA HANDLING AND RECORD KEEPING.....</b>                                                       | <b>38</b> |
| 13.1. Data Handling .....                                                                              | 38        |
| 13.1.1. e-CRF .....                                                                                    | 38        |
| 13.1.2. Central reading .....                                                                          | 38        |
| 13.2. Source data.....                                                                                 | 39        |
| 13.3. Data management .....                                                                            | 40        |
| 13.4. Archiving .....                                                                                  | 41        |
| <b>14. INSURANCE.....</b>                                                                              | <b>41</b> |
| <b>15. OWNERSHIP OF THE RESULTS - DISSEMINATION POLICY.....</b>                                        | <b>41</b> |
| 15.1. Ownership of the results .....                                                                   | 41        |
| 15.2. Dissemination policy .....                                                                       | 41        |
| 15.3. Administrative clauses concerning the sponsor and the investigator .....                         | 41        |
| 15.3.1. Persons to inform.....                                                                         | 41        |
| 15.3.2. Substantial protocol amendment, amended protocol and modification of<br>informed consent ..... | 41        |
| 15.3.3. Final study report.....                                                                        | 42        |
| 15.4. Concerning the investigator .....                                                                | 42        |
| 15.4.1. Confidentiality - Use of information .....                                                     | 42        |
| 15.4.2. Documentation supplied to the sponsor .....                                                    | 42        |
| <b>16. REFERENCES.....</b>                                                                             | <b>44</b> |
| <b>17. APPENDICES.....</b>                                                                             | <b>46</b> |

---

*APPROACH Clinical study protocol- Final version V1.0\_NL*

---

**List of tables**

|                                                                                                                                               |    |
|-----------------------------------------------------------------------------------------------------------------------------------------------|----|
| Table (5.2.2) 1 - Investigation schedule .....                                                                                                | 19 |
| Table (5.2.2) 2 - Burden for the patient.....                                                                                                 | 20 |
| Table (5.2.2) 3 - Volume (mL) of blood and urine collected during the study .....                                                             | 20 |
| Table (6.1) 1 – Distribution of subjects across the progression categories, obtained after enrollment of the 25–150 top ranked subjects ..... | 22 |
| Table (8.2) 1 - Effective dose for the knee and hand radiographs, knee high resolution CT and WBLDCT (in mSv per visit) .....                 | 33 |

---

*APPROACH Clinical study protocol- Final version V1.0\_NL*

---

**List of figures**

|                                                                                              |    |
|----------------------------------------------------------------------------------------------|----|
| Figure (6.1) 1 - The overall concept of the recruitment process in the APPROACH project..... | 21 |
| Figure (9.2) 1 - Permutation test .....                                                      | 36 |
| Figure (13.2) 1 - Data processing.....                                                       | 40 |

---

*APPROACH Clinical study protocol- Final version V1.0\_NL*

---

**List of appendices**

|                                                                                                      |     |
|------------------------------------------------------------------------------------------------------|-----|
| Appendix 1: World Medical Association Declaration of Helsinki .....                                  | 47  |
| Appendix 2: Administrative structure of the study and responsibilities of the<br>investigators ..... | 53  |
| Appendix 3: Standard Operating Procedures .....                                                      | 54  |
| Appendix 4: Questionnaires .....                                                                     | 157 |



*APPROACH Clinical study protocol- Final version V1.0\_NL***List of abbreviations**

|             |   |                                                                                                   |
|-------------|---|---------------------------------------------------------------------------------------------------|
| ACR         | : | American College of Rheumatology                                                                  |
| AE          | : | Adverse Event                                                                                     |
| e-CRF       | : | Electronic Case Report Form                                                                       |
| CRO         | : | Contract Research Organisation                                                                    |
| CT          | : | Computed Tomography                                                                               |
| DBP         | : | Diastolic Blood Pressure                                                                          |
| DMOAD       | : | Disease Modifying OA Drug                                                                         |
| DNA         | : | DeoxyriboNucleic acid                                                                             |
| EFPIA       | : | European Federation of Pharmaceutical Industries and Associations                                 |
| FIHOA       | : | Functional Index for Hand OsteoArthritis                                                          |
| GCP         | : | Good Clinical Practice                                                                            |
| HOOS        | : | Hip disability and Osteoarthritis Outcome Score                                                   |
| ICH         | : | International Conference on Harmonisation                                                         |
| ICOAP       | : | Intermittent and constant OA pain                                                                 |
| IMI         | : | Innovative Medicines Initiative                                                                   |
| I.R.I.S.    | : | Institut de Recherches Internationales Servier                                                    |
| IVD         | : | Intervertebral Disc                                                                               |
| JSN         | : | Joint Space Narrowing                                                                             |
| JSW         | : | Joint Space Width                                                                                 |
| KIDA        | : | Knee Images Digital Analysis                                                                      |
| KL          | : | Kellgren and Lawrence                                                                             |
| KOOS        | : | Knee injury and Osteoarthritis Outcome Score                                                      |
| MedDRA      | : | Medical Dictionary for Regulatory Activities                                                      |
| MOAKS       | : | Magnetic resonance imaging OsteoArthritis Knee Score                                              |
| MRI         | : | Magnetic resonance imaging                                                                        |
| mSv         | : | milli Sievert                                                                                     |
| METC        | : | Medisch Ethische Toetsings Commissie                                                              |
| MTP         | : | MetaTarsophalangeal                                                                               |
| N           | : | Non progressors                                                                                   |
| NRS         | : | Numeric Rating Scale                                                                              |
| OA          | : | OsteoArthritis                                                                                    |
| OARSI       | : | OsteoArthritis Research Society International                                                     |
| P           | : | Pain progressors                                                                                  |
| PA          | : | Posterior Anterior                                                                                |
| P+S         | : | Pain and Structure progressors                                                                    |
| RNA         | : | Ribonucleic acid                                                                                  |
| ROM         | : | Range of Motion                                                                                   |
| S           | : | Structure progressors                                                                             |
| SAE         | : | Serious Adverse Event                                                                             |
| SBP         | : | Systolic Blood Pressure                                                                           |
| SD          | : | Standard Deviation                                                                                |
| SF-36       | : | Short Form (36) Health Survey                                                                     |
| SSM         | : | Statistical Shape Model                                                                           |
| TKR         | : | Total Knee Replacement                                                                            |
| UMC Utrecht | : | University Medical Centre Utrecht                                                                 |
| WBLDCT      | : | Whole Body Low Radiation Computed Tomography                                                      |
| WHO-DD      | : | World Health Organization, Drug Dictionary                                                        |
| WMO         | : | Wet Medisch-wetenschappelijk Onderzoek met mensen - Medical Research Involving Human Subjects Act |

## 1. ADMINISTRATIVE STRUCTURE OF THE STUDY

This section is described in a separate document.

The list of investigators is given in a document attached to the protocol for each country.

## 2. SUMMARY

**Rationale:** Despite a large and growing disease burden in osteoarthritis (OA), many pharmaceutical companies have abandoned OA drug development. This is mainly due to the lack of appropriate outcome measures that can robustly identify patients that can benefit from a specific therapy. Different phenotypes of OA may benefit from different types of treatment. Therefore, novel markers to identify selected phenotypes of osteoarthritis may encourage drug development.

**Objective:** To prospectively describe in detail pre-identified progressing phenotypes of patients with knee OA by use of conventional and novel clinical, imaging, and biochemical (bio)markers, and to validate and refine a predictive model for these (and new) progressing phenotypes based on these markers.

**Study design:** APPROACH is an exploratory, European, five-centre, 2-year prospective follow-up, cohort study, with extensive measurements. In this study patients are treated according to regular care by their own physician with no study related treatment prescribed. Study related diagnostic and/or monitoring procedures are applied to the patients.

**Study population:** Patients with tibiofemoral knee osteoarthritis, according to the clinical ACR classification criteria, pre-identified based on demographic (*e.g.* age), clinical (*e.g.* Pain NRS) and tissue structure (*e.g.* radiographic joint space width) parameters.

**Main study parameters/endpoints:** Joint tissue structure based on radiographs, MRI, and biochemical (bio)markers as well as symptoms (pain, function) and quality of life by questionnaires.

**Secondary parameters:** A multitude of (novel and conventional) clinical, imaging, and biochemical parameters related to osteoarthritis.

**Nature and extent of the burden and risks associated with participation, benefit and group relatedness:** The participants will not have any direct benefit from their participation in this study other than that their OA is maximally diagnosed and followed in detail for up to 2 years (screening, baseline, 6 months, 12 months, 24 months). Patients will stay in the hospital for 4-5 hours per visit (for screening about 30 min) for physical examination, blood draw, MRI scans, radiographs of knees and hands (only at baseline and 24 months), CT scan of the knee (only at baseline and 24 months), low radiation whole body CT scan (only at baseline and 24 months), HandScan (only at baseline and 24 months), motion analysis, and performance based tests. They will be asked to fill out questionnaires about knee, hand and hip osteoarthritis, and about general health and pain. The patient council in the consortium indicated that the load is acceptable. The patient council will be involved in the execution of the study. The assumed risk is minimal for an individual patient and minimal compared to the contribution to the development of knowledge of their disease. These risks include minimal events due to blood sampling itself (such as hematoma

---

*APPROACH Clinical study protocol- Final version V1.0\_NL*

---

or localized bleeding), radiation exposure by radiographic imaging techniques (with a minimal increased healthcare risk), and exposure to MRI techniques (without known risks and without use of contrast agents).

### 3. BACKGROUND INFORMATION

Osteoarthritis (OA), a degenerative joint disease, is a progressive disorder of the joints characterised by gradual loss of cartilage, peri-articular bone changes, and mild synovial inflammation, leading to pain and function limitations.

OA is the most common global arthritic disease and is becoming more prevalent as the population ages and obesity rates rise. OA is already one of the ten most disabling diseases in developed countries. Global estimates are that 9.6% of men and 18.0% of women over 60 have symptomatic OA, 80% of those with OA will have functional limitations and 25% cannot perform their major daily activities of life. Direct and indirect costs of OA for the EU are substantial: in the Scandinavian countries, the Netherlands, and the UK, total costs are estimated to be about 10% of the medical costs, equivalent to 1% of the annual gross national product.

Many pharmaceutical organizations have currently abandoned disease modifying OA drugs (DMOAD) development due to real and perceived hurdles. A number of visible and costly failures have highlighted the challenge. Considering the problem and societal impact, there remains a major unmet need as current treatments are predominantly limited to (often insufficient) symptomatic relief (pain, inflammation, and function) or costly and invasive surgical intervention. Multiple reasons have been identified as underlying causes of past DMOAD failures:

1. Heterogeneity of OA progression rate. The majority of an unselected OA population does not progress substantially radiographically or clinically in a 2 year window as in general the disease is slowly progressing (Felson, 2013); Using the (bio)markers or knowledge should help to prospectively identify patients at risk of clear progression.
2. Limited understanding of OA pathogenesis. Progress in our knowledge of the pathophysiology of OA leads to the division of the disease into several possible different subtypes: such as post-traumatic, metabolic, ageing, inflammatory, bone driven, and genetic. Some of these types are amenable to (specific subtype directed) pharmacologic intervention, and some of which are expected to be less so. Discriminating (bio)markers able to differentiate between these subtypes are lacking.
3. Absence of precision medicine mind-set. Clinical development plans have frequently used a 'one size fits all' approach rather than a matching mechanism of action to specific OA patient subtypes.
4. Reliance on relatively insensitive endpoints. Radiograph-based joint space narrowing (the current standard endpoint to demonstrate disease modification) is in its present form insensitive and does not allow visualization of the cartilage tissue, of major relevance in the disease (Bijlsma, 2011).

Therefore the issues in OA drug development are large and complex and in clinical development challenges for identification of selected OA phenotypes could be best addressed by a Public-Private partnership of engaged and knowledgeable and complimentary industrial, academic, and patient experts who can accelerate innovation and provide viable solutions.

---

*APPROACH Clinical study protocol- Final version V1.0\_NL*

---

The APPROACH project is part of a larger project being conducted under the Innovative Medicine's Initiative (IMI). It is a joint venture bringing together 13 academic institutions across Europe, 6 biotechnology companies, 2 patient advocacies, and 4 pharmaceutical companies with the aim to prospectively describe progressing phenotypes of patients with knee OA. By the use of conventional and novel clinical, imaging, and biochemical (bio)markers and to validate and refine a predictive algorithm for these progressing phenotypes based on these (bio)markers, the APPROACH project intends to bring knowledge about the development of the disease.

For a rough pre-screening of patients, the APPROACH consortium will combine data from a significant number of large existing OA cohorts with knee and hand OA patients from Europe and the U.S. into a unified bioinformatics platform to define differentiating phenotypes of knee OA progression based on existing (bio)markers. This 'datamining' is not part of the present protocol, but will provide the inclusion algorithm comprising demographic (*e.g.* age), clinical (*e.g.* Pain NRS), and tissue structure (*e.g.* radiographic joint space width, MRI measures) parameters used for the present prospective cohort study.

Based on the algorithms for prediction of progression, patients (with a certain chance on) belonging to each of 3 defined progression phenotypes will be selected and asked to participate in the longitudinal APPROACH prospective cohort study. We aim to include a total of 300 patients. The algorithms, based on existing (bio)markers, will only roughly identify patients belonging to one of the knee OA progression phenotypes.

In the prospective follow-up APPROACH study, a large set of conventional (bio)markers supplemented with novel (bio)markers of knee OA, as well as multiple confounding factors of OA in general, will be determined at baseline and 6 months later (to provide data on relatively short term changes in these (bio)markers). Moreover, the progression of the disease in the 3 phenotypes will be monitored by the conventional as well as more state of the art (bio)markers yearly, over 2 years. As such this study will lead to robust prediction models for different phenotypes of knee OA (preferably at the patient level), and will provide robust (bio)markers for following disease progression over time in these phenotypes.

Conventional (bio)markers include clinical characteristics, standard radiographs, commercial biochemical blood/urine markers, and (semi)quantitative MRI imaging. Novel (bio)markers include epigenetic-, transcriptomic-, proteomic-, metabolomic analysis, novel radiographic imaging modalities, qualitative MRI imaging, imaging techniques related to inflammation, and motion analysis techniques. Confounding (bio)markers include amongst others markers of hand and hip OA, joints frequently and concomitantly affected in case of knee OA involvement.

In this study, no new treatment will be provided and no deviations from the standard therapeutic procedures as decided by the treating physician will be introduced. At the end of the study, no follow-up of the participants will be required.

The study will be conducted in compliance with the protocol, Good Clinical Practice (GCP), Declaration of Helsinki and the applicable regulatory requirements.

This project would provide a setting for regulatory guidance and healthcare agency interaction as well as to build stronger collaborations among academic and industrial groups to enable development of effective treatment options.

---

*APPROACH Clinical study protocol- Final version V1.0\_NL*

---

The APPROACH project has received support from the Innovative Medicines Initiative (IMI) under grant agreement n°115770, resources of which are composed of financial contribution from the European Union and in kind contribution from EFPIA companies.

#### **4. STUDY OBJECTIVES AND PURPOSE**

The objectives of the APPROACH study are:

- To validate the prediction model for sustained pain and decrease in (minimal) JSW as developed for the selection/inclusion of patients (primary objective).
- To develop and validate predictive models for OA progression by use of conventional and novel clinical, imaging, and biochemical (bio)markers (secondary objective).
- To discover and predict novel OA phenotypes (*e.g.* such as post-traumatic, metabolic, ageing, inflammatory, bone driven, and genetic) (exploratory objective).
- To prospectively describe in detail the discovered phenotypes of patients with knee OA by use of conventional and novel clinical, imaging, and biochemical (bio)markers (exploratory objective).

#### **5. STUDY DESIGN**

##### **5.1. Endpoints and co-variables**

(\*indicates when (bio)markers are exploratory)

##### **5.1.1. Endpoints for description of the index knee OA progression phenotypes**

OA progression of the index knee (one of both knees with the most severe OA, see in paragraph 5.2.1) will be described over 2 years in the different patient phenotypes as defined by changes from baseline to the 1- and 2-year visit at which they are evaluated. The endpoints are grouped by validated and well described evaluation methods and listed below:

1. Structural progression (progression of tissue structure damage/alterations)
  - a) Radiographic parameters:  
Knee OA severity assessed by changes in different validated scoring systems (KL grading, OARSI scoring, and KIDA measurements)
  - b) Quantitative MRI parameters:  
Quantitative cartilage parameters including thickness, volume, and denuded bone areas of the femoro-tibial joint.
  - c) Semi quantitative MRI parameters:  
Semi quantitative scorings of cartilaginous and non-cartilagenous components including bone marrow oedema, meniscal alteration, and synovitis, assessed separately and under a global score (MOAKS).

---

*APPROACH Clinical study protocol- Final version V1.0\_NL*

---

- d) Advanced radiographic parameters:
    - bone shape analyses\* on standard radiographs representing OA related bone deformations/adaptations
    - subchondral bone architecture\* on standard radiographs representing OA related bone deformations/adaptations
    - bone shape analyses\* on high resolution CT representing OA related bone deformations/adaptations at M024
    - subchondral bone architecture\* on high resolution CT representing changes trabecular deformations/adaptations
  - e) Biochemical (bio)markers:

Protein (bio)markers in blood and urine representing cartilage, bone and synovial matrix turnover as well as inflammation.
2. Pain and function
- a) Questionnaire for knee pain, symptoms, activities of daily living, sport and recreation, function, and knee-related quality of life (KOOS)
  - b) Questionnaire for distinction between constant and intermittent knee pain (ICOAP)
  - c) General pain and function parameters:
    - Pain numeric rating scale (NRS)
    - Physical examination of knee by a research physician (or research nurse) including range of motion/flexion of the knee

### **5.1.2. Endpoints for prediction of index knee OA progression phenotypes**

Prediction of OA progression (*i.e.* based on the classification sustained pain and decrease in (minimal) JSW as used in inclusion) will be evaluated through machine learning algorithms which will take into account as predictors/features:

- the endpoints of structure, pain, and function (as listed in the paragraph 5.1.1) evaluated on the index knee at baseline, and
  - a) Qualitative MRI parameters at baseline:
    - T2 relaxation MRI\* representing cartilage collagen distribution
  - b) Advanced imaging parameters at baseline:
    - bone shape analyses\* on high resolution CT representing OA related bone deformations/adaptations
    - subchondral bone architecture\* on high resolution CT representing changes trabecular deformations/adaptations
    - bone shape analysis\* on MRI representing bone area and shape
- Changes over 6 months' time (considered a relative short time window) of the parameters of the index knee as mentioned above (5.1.1 and 5.1.2), in case evaluated at 6 months. Relative short term changes of certain parameters are considered better predictors than cross-sectional evaluation of these same parameters.
- Motion analyses (by use of GaitSmart system including knee and hip function)\* at baseline and 6 months
- Performance based test (the 30 second chair stand test and the 4 times 10 meter fast paced walk test) at baseline and 6 months

### 5.1.3. Co-variables

Additionally, co-variables as listed below will also be used in the machine learning modelling:

- Contralateral knee OA
  - Tissue damage by radiographic parameters (KL grading, OARSI scoring, and KIDA measurements)
- Hand OA
  - Inflammation of the hand joints (HandScan)\*
  - Tissue damage of the hand joints (hand radiographs; KL, OARSI, Verbruggen-Veys score)
  - Pain and function of the hand joints (FIHOA questionnaire)
- Hip OA
  - Tissue changes of the hip joints by use of low radiation whole body CT\*
  - Pain and function of the most painful (or right) hip joint (questionnaires HOOS and ICOAP)
- Facet joint OA and intervertebral disc (IVD) degeneration
  - Tissue changes in the spine (facet, vertebral body and disc by use of low radiation whole body CT)\*
- Shoulder OA
  - Tissue changes in the shoulder (acromioclavicular and glenohumeral) joints (by use of low radiation whole body CT)\*
- General pain and function parameters
  - Questionnaire for quality of life (SF-36)
  - Pain with concomitant pain medication registration in one month diary\*
  - Pain numeric rating scale (NRS) of contralateral knee, both hips, both hands, and spine
  - Pain DETECT questionnaire used to identify the likelihood of a neuropathic pain component in patients
  - Motion analyses (by use of GaitSmart system including knee and hip function)\* at 24 months
  - Performance based test (the 30 second chair stand test and the 4\*10 meter fast paced walk test) at 24 months
  - Physical examination of contralateral knee, hips (including range of motion/flexion) and hands
- Optional systemic biochemical (bio)markers
  - epigenetic, genomic, transcriptomic, (novel)proteomic, lipidomic and metabolomic markers\*
- General clinical data
  - History and type of knee traumatism in case
  - History and type of knee surgery in case
  - Smoking habits
  - Menopause status in case of woman
  - Concomitant treatment
- Advanced parameters
  - bone shape analyses\* (on standard radiograph for contralateral knee)
  - subchondral bone analysis\* (on standard radiograph for contralateral knee)
  - bone shape analysis of the hip\* (on low resolution whole body CT)



## 5.2. Experimental design

### 5.2.1. Study plan

This is an exploratory, European, five-centre, 2-year prospective follow-up, cohort study, with extensive measurements, without therapeutic benefit (no study-prescribed modification of standard of care during the two years study period).

Patients with an increased risk of progression of knee osteoarthritis within 2 years, will be included based on two predictive algorithms applied respectively for pre-screening of patients before the screening visit and for their inclusion by checking parameters evaluated at the screening visit.

Three types of progression of the disease will be taken into account:

1. progression based on pain,
2. progression based on tissue structural damage or
3. progression based on pain and tissue structural damage

Structural progression is defined as a reduction of joint space width over time at a threshold of **0.3 mm narrowing per year**.

Pain progression is defined (based on the minimum clinically important difference (MCID); Angst et al. 2001) as:

- *significant pain increase* (change between baseline and follow-up is at least 5 points per year) and *significant pain* at follow-up (at least 40 points),
- *fast pain increase* (change between baseline and follow-up is at least 10 points per year) and *less than significant pain* at follow-up (at least 35 points)
- *stable pain* (no less than 40 points at baseline and follow-up).

For each patient, an index knee will be defined at the screening visit. The index knee will be defined by the expert opinion (physician). In case both knees are affected equally the right knee will be selected as index knee.

The study duration is two years and the following visits will take place:

1. Screening visit/ASSE (-2 months)
2. Inclusion visit/M000
3. Follow-up visits at 6, 12, and 24 months thereafter, that is, M006, M012 and M024.

For selection/inclusion of patients, algorithms for identification of the 3 phenotypes, comprising demographic (*e.g.* age), clinical (*e.g.* Pain NRS) and tissue structure (*e.g.* radiographic joint space width) parameters are used. Patients will be screened based on these algorithms. Because not always recent or appropriate data and images of these patients are available, a screening visit with knee radiograph and knee pain/function assessment is needed to check whether identified patients are indeed eligible for inclusion. Based on the screening data, the final prospective cohort will be enriched by selecting the 70% of patients with the highest predicted probability of belonging to the progression phenotype. As such, 30% of screened patients will not enter the prospective cohort.

Only if eligible for inclusion, patients will be invited for a M000 visit where all additional baseline data and images will be gathered.

---

*APPROACH Clinical study protocol- Final version V1.0\_NL*

---

According to the feasibility at the clinical centres, to collect blood samples in fasting conditions, the patients will go to the hospitals or home visits will be organized as much as possible.

For each visit, all exams for one visit have to be performed  $\pm$  one week from the visit. The window between screening and M000 visit will be at maximum of 2 months to allow evaluation of inclusion criteria such as evaluation of the knee radiograph by use of KIDA of the pre-selected patients. For follow-up, a window period of  $\pm$  one month will apply for M006 visit and of  $\pm$  two months for M012 and M024 visits.

Patients will be reminded before inclusion, M006, M012 and M024 visits to come to the clinical centres on fasting status if feasible, to bring back the completed questionnaires and the urine samples collected with the containers provided at the previous visit.

### **5.2.2. Investigation schedule**

[Table \(5.2.2\) 1](#) describes the investigations assessed during the study and [Table \(5.2.2\) 2](#) describes the associated burden.

For further practical details, methods of measurement are provided in section 7.

## APPROACH Clinical study protocol- Final version V1.0\_NL

Table (5.2.2) 1 - Investigation schedule

|                                                                                                                                                        | Screening /ASSE | Inclusion/ M000 | M006 | M012 | M024 |
|--------------------------------------------------------------------------------------------------------------------------------------------------------|-----------------|-----------------|------|------|------|
| <b>General</b>                                                                                                                                         |                 |                 |      |      |      |
| Informed consent                                                                                                                                       | X               |                 |      |      |      |
| Informed consent for pharmacogenomics (optional)                                                                                                       | X               |                 |      |      |      |
| In- and exclusion criteria                                                                                                                             | X               |                 |      |      |      |
| Defining index knee                                                                                                                                    | X               |                 |      |      |      |
| Height                                                                                                                                                 | X               |                 |      |      |      |
| Weight                                                                                                                                                 | X               | X               | X    | X    | X    |
| Waist circumference                                                                                                                                    |                 | X               | X    | X    | X    |
| SBP, DBP, pulse rate                                                                                                                                   |                 | X               | X    | X    | X    |
| Previous treatments                                                                                                                                    |                 | X               |      |      |      |
| Relevant medical/surgical history related to OA                                                                                                        |                 | X               |      |      |      |
| Adverse events related to protocol procedures                                                                                                          |                 | X               | X    | X    | X    |
| <b>Progression of knee OA; structural parameters</b>                                                                                                   |                 |                 |      |      |      |
| Radiography of index knee (for assessment of KIDA parameters (ASSE) and for assessment of OA severity, bone shape analyses, subchondral bone analysis) | X               |                 | X    | X    | X    |
| MRI of index knee for quantitative analysis (thickness and volume of cartilage, denuded bone area)                                                     |                 | X               | X    | X    | X    |
| MRI of index knee for semi-quantitative analysis (MOAKS analysis)                                                                                      |                 | X               | X    | X    | X    |
| Blood and urine for systemic biochemical markers                                                                                                       |                 | X               | X    | X    | X    |
| <b>Progression of knee OA; pain and function</b>                                                                                                       |                 |                 |      |      |      |
| KOOS for index knee                                                                                                                                    | X <sup>a</sup>  | X               | X    | X    | X    |
| ICOAP for index knee                                                                                                                                   |                 | X               | X    | X    | X    |
| Pain NRS for index knee                                                                                                                                | X <sup>b</sup>  | X               | X    | X    | X    |
| Physical examination of both knees (ROM,..)                                                                                                            | X <sup>c</sup>  | X               | X    | X    | X    |
| <b>Prediction of knee OA progression</b>                                                                                                               |                 |                 |      |      |      |
| Shape analysis on MRI of index knee for quantitative analysis                                                                                          |                 | X               | X    |      |      |
| MRI of index knee for qualitative analysis (advanced T2 map) <sup>e</sup>                                                                              |                 | X               | X    |      |      |
| High resolution CT of index knee for advanced structure detection and shape analysis                                                                   |                 | X               |      |      | X    |
| Motion analysis                                                                                                                                        |                 | X               | X    |      |      |
| Performance based tests                                                                                                                                |                 | X               | X    |      |      |
| <b>Co-variables</b>                                                                                                                                    |                 |                 |      |      |      |
| Radiography of contralateral knee (for assessment of OA severity, bone shape analyses, subchondral bone analysis)                                      |                 | X               |      |      | X    |
| Radiography of both hands                                                                                                                              |                 | X               |      |      | X    |
| Handscan to assess inflammation in the hand joints <sup>f</sup>                                                                                        |                 | X               |      |      | X    |
| FIHOA for function of the hands                                                                                                                        |                 | X               |      |      | X    |
| Low dose whole body CT for OA assessment in hips, shoulders and spine and hip bone shape analysis                                                      |                 | X               |      |      | X    |
| HOOS and ICOAP for the most painful or right hip                                                                                                       |                 | X               |      |      | X    |
| SF-36 for quality of life                                                                                                                              |                 | X               | X    | X    | X    |
| One month diary for pain intensity and pain killers taken                                                                                              |                 | X               | X    | X    | X    |
| Pain NRS for contralateral knee, for both hips separately, lower back and both hands separately                                                        | X <sup>b</sup>  | X               | X    | X    | X    |
| Pain DETECT                                                                                                                                            |                 | X               | X    | X    | X    |
| Motion analysis                                                                                                                                        |                 |                 |      |      | X    |
| Performance based tests                                                                                                                                |                 |                 |      |      | X    |
| Physical examination of the hips, hands                                                                                                                |                 | X               | X    | X    | X    |
| Menopausal status/Pregnancy (if women are not menopausal)                                                                                              | X               | X               | X    | X    | X    |
| Comorbidities                                                                                                                                          |                 | X               | X    | X    | X    |
| Smoking habits                                                                                                                                         |                 | X               | X    | X    | X    |
| Concomitant treatments                                                                                                                                 |                 | X               | X    | X    | X    |
| <b>Other measurements - Genomic markers<sup>d</sup></b>                                                                                                |                 |                 |      |      |      |
| RNA                                                                                                                                                    |                 | X               |      |      | X    |
| DNA                                                                                                                                                    |                 | X               |      |      | X    |
| Ethnic origin                                                                                                                                          | X               |                 |      |      |      |

a: a reduced version of KOOS, with only questions on functions, stiffness and pain, will be used at screening, b: at screening Pain NRS will be evaluated right now and during the last week, c: to check ACR criteria of the index knee d: optional, e: Advanced T2 map MRI is not available for patients included in Oslo, f: Handsdcan analysis will be performed in the participating centers in Utrecht, Leiden and Paris.

## APPROACH Clinical study protocol- Final version V1.0\_NL

**Table (5.2.2) 2 - Burden for the patient**

| Examinations                                                                                            |                                                         | Time burden | Other burden       |
|---------------------------------------------------------------------------------------------------------|---------------------------------------------------------|-------------|--------------------|
| Physical examination                                                                                    |                                                         | 15 min      |                    |
| Questionnaires                                                                                          |                                                         | 30-45 min   |                    |
| Radiograph                                                                                              | Both knees and hands                                    | 15-20 min   | Radiation exposure |
| CT                                                                                                      | Low radiation whole body and high resolution index knee | 10 min      | Radiation exposure |
| MRI                                                                                                     | Quantitative and semi quantitative                      | 30 min      |                    |
| MRI                                                                                                     | T2                                                      | 10-15 min   | Minimal invasive   |
| Blood and urine                                                                                         |                                                         | 10 min      | Veni puncture      |
| Hand scan                                                                                               |                                                         | 5 min       |                    |
| Motion analyses (Gait Smart, 20m walking) and performance based tests (30 sec stand up and 40m walking) |                                                         | 30 min      |                    |

Table (5.2.2) 3 provides the volume of blood and urine collected (according SOP 10.1) per participant during the study for the assessment of biochemical and genomic markers. A maximum total volume of 113 mL (if also consent for genomic markers) blood per participant will be collected during the 2 year follow-up of the study. At each visit all blood samples will be taken via a single veni puncture.

**Table (5.2.2) 3 - Volume (mL) of blood and urine collected during the study**

|                                             | Inclusion/M000 | M006  | M012  | M024   |
|---------------------------------------------|----------------|-------|-------|--------|
| <b>Urine</b> for biomarkers                 | 50 mL          | 50 mL | 50 mL | 50 mL  |
| <b>Blood</b> for biomarkers                 |                |       |       |        |
| Serum                                       | 21 mL          | 21 mL | 21 mL | 21 mL  |
| Plasma                                      | 7 mL           | -     | -     | -      |
| <b>Blood</b> for genomic markers (optional) |                |       |       |        |
| DNA                                         | 8.5 mL         | -     | -     | 8.5 mL |
| RNA                                         | 2.5 mL         | -     | -     | 2.5 mL |

### 5.3. Premature discontinuation of the study

The sponsor will suspend the study if there is sufficient ground that continuation of the study will jeopardise subject health or safety. The sponsor will notify the accredited ethical committees without undue delay of a temporary halt including the reason for such an action. The study will be suspended pending a further positive decision by the accredited ethical committees. The investigator will take care that all subjects are kept informed.

### 5.4. In case of TKR or surgery indication

If a patient will have a total knee replacement (TKR) prosthesis surgery of the index knee or contra-lateral knee within the two years of follow-up, images of that specific joint will be irrelevant and not performed. All other acquisitions will be performed as scheduled and patients remain in the study.

## 6. STUDY POPULATION

### 6.1. Recruitment of the patients

The recruitment process for the APPROACH cohort will be primarily from existing European osteoarthritis cohorts of the participating centres and expanded with new subjects at these centres. Subjects who are likely to experience disease worsening in the next 2 years (based on the model in case of existing cohorts or based on expert opinion in case of new recruitments) will be identified and invited to a screening visit. A final set of the study participants will be selected by using the data collected at the screening visit (based on a second refinement algorithm).

In contrast to classic approaches, which use conventional inclusion criteria, *machine learning* (ML) models will be used to predict the likelihood of each patient becoming a fast OA progressor. In **pre-screening stage**, a customised ML model will be used for each cohort, that was trained on the historical data. In the **screening stage**, the decision to enroll subjects will be based on predictions of a final ML model, adjusted to work with the specific measurements from the screening visit.

Additional new patients, outside of the existing cohorts, might be recruited and they will follow the same process starting with the screening visit and enrollment is based on the likelihood of becoming a fast progressor.

Figure (6.1) 1 - The overall concept of the recruitment process in the APPROACH project

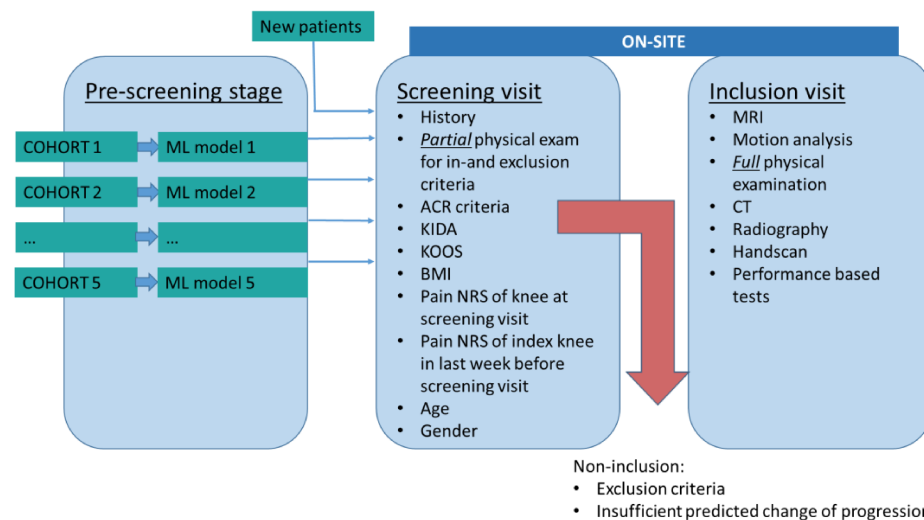

To demonstrate the feasibility of the recruitment strategy, a simulation of this process was performed on the existing CHECK cohort data. The data at years 0, 2 and 5 were used as baseline for prediction and the real outcomes at years 2, 5 and 8 were used to assess the results of the recruitment process. There were 64% non-progressors (N), 17% pain-related (P), 14% structure-related (S) and 5% both pain and structure-related (P+S) progressors in the original CHECK cohort. The table below shows the distribution of subjects across the progression categories, obtained after enrollment of the 25–150 top ranked subjects.

## APPROACH Clinical study protocol- Final version V1.0\_NL

**Table (6.1) 1 – Distribution of subjects across the progression categories, obtained after enrollment of the 25–150 top ranked subjects**

| # of subjects | N   | P   | S   | P+S |
|---------------|-----|-----|-----|-----|
| 25            | 32% | 32% | 4%  | 32% |
| 50            | 34% | 40% | 2%  | 24% |
| 75            | 35% | 36% | 8%  | 21% |
| 100           | 34% | 37% | 9%  | 20% |
| 125           | 34% | 38% | 10% | 18% |
| 150           | 35% | 39% | 11% | 15% |

Although the ML model prediction is not perfect (there were still be about 35% non-progressors enrolled), it enriched the number of progressors in the targeted categories (in comparison to the source distribution). Both the P+S and P categories were relatively larger, at the cost of a smaller S category. The structural progressors could be further enriched, if needed, by lowering the prediction threshold for the S category (currently at  $p = 0.5$  for both P and S). It is essential to the success of the APPROACH project to maximize the number of recruited P+S and S progressors.

## 6.2. Selection of the patients

At the screening visit after signing informed consent, subjects in existing osteoarthritis cohorts classified as likely to show progression over the next two years based on existing data or new subjects are checked for inclusion and exclusion criteria in order to participate in the APPROACH study as described below.

### 6.2.1. Inclusion criteria determined at screening visit

1. Informed consent obtained as described in section 12.3 of the protocol.
2. Ambulatory (able to walk unassisted)
3. At least 18 years of age
4. Capable of understanding the study
5. Capable of writing and reading in local language
6. Predominantly tibiofemoral knee osteoarthritis and satisfy the clinical classification criteria of the American College of Rheumatology (ACR): Knee pain and three of the following criteria: over 50 years age, less than 30 minutes of morning stiffness, crepitus on active motion, bony tenderness, bony enlargement, or no palpable warmth.
7. Highest probability to progress based on the algorithm based on the following parameters:
  - KOOS questionnaire
  - BMI (in recording height and weight)
  - Pain NRS of the index knee at the moment of the screening visit
  - Pain NRS of the index knee during the last week before the screening visit
  - Age
  - Gender
  - KIDA parameters of the index knee, based on standardized weight-bearing (KIDA) radiograph, measured < 3 months (patients with a JSW < 2 mm of the index knee will not be included)

## 6.2.2. Exclusion criteria

### 6.2.2.1. General exclusion criteria

A potential subject who meets any of the following criteria will be not included in the APPROACH study.

8. Not being able to comply to the protocol
9. Participating in a trial with local therapeutic intervention for index knee OA (pharmaceutical or surgical) or systemic DMOADs or potential DMOADs treatments for OA at the same time or within the past 6 months or anticipated in the forthcoming; participation in non-interventional registries or epidemiological studies is allowed.
10. Surgery of the index knee in the past 6 months (to avoid interferences with imaging)
11. Scheduled or expected surgery of the index knee in the next 2 years (to avoid interferences with imaging)
12. Pregnancy (child bearing woman) because of imaging (radiation and MRI, risks)

### 6.2.2.2. Medical exclusion criteria

13. Predominantly patellar femoral knee OA (clinical judgment)
14. The following secondary osteoarthritis of the knee: clinically significant deformities of the lower limbs (varus  $>10^\circ$ , valgus  $>10^\circ$ ), septic arthritis, inflammatory joint disease, gout, major chondrocalcinosis (pseudogout), Paget's disease of the bone, ochronosis, acromegaly, haemochromatosis, Wilson's disease, rheumatic symptoms due to malignancies, primary osteochondromatosis, osteonecrosis, osteochondritis dissecans, haemophilia
15. Generalized pain syndrome, for example fibromyalgia
16. Patients with contra indication to MRI or CT
17. Hip replacement or expected hip replacement within 6 months
18. Osteosynthesis material near the knee joint
19. Self-reported severe IVD degeneration or facet OA

## 6.3. Participant withdrawal

### 6.3.1. Withdrawal criteria

The reasons for premature discontinuation of the study are:

- **Judgement of the investigator** on potential incapacity of the patient to continue in the study (a cause leading to misinterpretation of the OA progression (significant surgery on the index knee or occurrence of a disease of the index knee OA)).
- **Major deviation to protocol** if it interferes with the study evaluations and/or if it jeopardizes patient's safety (including pregnancy for the foetus).
- **Non-medical reason** *e.g.* consent withdrawal.
- **Lost to follow-up.**

### **6.3.2. Procedure**

If a patient does not attend the planned visit unrelated to consent withdrawal, the investigator will make effort to contact him/her by mail and/or phone to arrange a new visit within the time span allowed.

In case of lost to follow-up, when the investigator has no news of the participant, he/she will make effort to contact him/her by mail and/or phone, to ask if the patient is still willing to stay in the study or wants to withdraw consent.

## **7. STUDY PROCEDURES**

The study parameters will be performed at the designated study visits as indicated in [Table \(5.2.2\) 1](#). All acquisition procedures are performed according to standard operation procedures (SOPs) as described for each of the procedures separately in [appendix 3](#).

### **Medical and surgical history**

A list of each subject's specific OA related medical and surgical history, including history and type of knee traumatism, history and type of knee surgery, previous treatments, potential cause of secondary OA will be recorded at the inclusion visit.

### **Previous and concomitant treatments and comorbidities**

At inclusion visit, the investigator will ask the patient about previous and concomitant treatments received (including treatments likely to have an action on cartilage or bone metabolism, arthroscopy, intra articular injection...). At each follow-up visit, the patient will be asked for new concomitant treatments since the last visit including surgical treatments. Concomitant treatments related to OA or expected to influence biomarkers of OA will be recorded in the e-CRF.

Comorbidities are recorded according to the Charlson index ([Charlson, 1987](#)).

### **Other information**

Smoking habits will be recorded at inclusion and at follow-up visits.

Menopausal status for women will be recorded at the screening visit (menopause is defined by last menstrual bleeding  $\geq 12$  months ago, not using oral contraceptives, etc). If the patient is not in a menopausal status, the investigator will advice her to use effective method of birth control during the whole period of the study. At each visit the investigator will ask her if she is pregnant in order to withdraw her from the study because imaging (radiation risks) can jeopardize patient's safety (for the foetus).

The medical and surgical information related to the index knee at follow-up visits will be reported in specific pages of the e-CRF.

### **7.1. Physical examination**

General physical examination will be performed at each visit by measuring weight, waist circumference, systolic and diastolic blood pressure (SBP and DBP) and pulse rate after 5 minutes rest in the sitting position in a standardised way, according to SOP 11. Each subject's height will be measured at the screening visit only.

The data obtained during the physical examination will be recorded in the patient's hospital medical file as source data and in the e-CRF.



---

*APPROACH Clinical study protocol- Final version V1.0\_NL*

---

**7.1.1. Knee physical examination**

For each knee the following knee examinations will be recorded:

- The warmth of the knee (presence yes/no) as well as the presence of an effusion (positive patellar tap) will be assessed.
- Passive ranges of flexion and extension will be measured with a goniometer. Flexion to be reported as  $<90^\circ$ ; comprises between  $90$  and  $120^\circ$  or  $>120^\circ$ . For the extension, presence of a flexum will be reported as yes or no.
- Presence of varus/valgus
- Pain and grinding in the patellofemoral joint will be evaluated by the grinding test and reported as yes or no.

**7.1.2. Hip and hand physical examination**

Physical examination of hip and hands will be performed to assess possible OA as co-variables important for *e.g.* biomarker analysis. For both hips the passive ranges of motion will be measured:

- - Flexion will be reported as  $<90^\circ$ , between  $90$  and  $120^\circ$ , or  $>120^\circ$ .
- - For the extension, presence of a flexum will be reported as yes or no.
- - Internal and external hip rotations will be reported as  $<30^\circ$ , between  $30$  and  $45^\circ$ , or  $>45^\circ$ .

On all hands joints, location and number of Heberden and Bouchard nodes will be evaluated. Number and location of inflamed joints as defined by soft (peri) articular tissue swelling on palpation (sometimes accompanied by redness) will be assessed. Hard tissue enlargement and subluxation of the first thumb metacarpal joint will be reported. Deformity will be assessed in Distal Inter Phalangeal (DIP) joints.

The articular index of Doyle will be used to evaluate the severity of hand osteoarthritis by grading pain (0-3) in 24 joints and joints groups (DIP, PIP, and MCP joints, IP joint of thumb and first carpometacarpal joint) by pressure or passive movement (Doyle, 1981).

Patients will be asked whether pain was present in hand joints during a period of more than 20 days during the last month.

**7.2. Imaging with central reading**

To evaluate the progression of OA in the index knee, standard radiographs and MRI images of the knee will be performed (see below).

In addition, novel MRI techniques and high resolution CT of the index knee will be performed to evaluate the additional value of these novel techniques in prediction of progression of OA. These different imaging techniques visualize different tissue characteristics in the knee joint, possibly differently involved in the process of osteoarthritis (different phenotypes). In order to correct for concomitant osteoarthritis in hands, hips, shoulders and lower back, radiographs of both hands and a whole body CT will be performed. The low radiation whole body CT provides images of all relevant joints of sufficient quality to assess confounding with similar radiation exposure than performing conventional radiographs of all relevant joints.

---

*APPROACH Clinical study protocol- Final version V1.0\_NL*

---

The SOPs describing acquisition are in [Appendix 3](#). All reading and analyses of images are performed at central facilities. The responsibilities of the Central reading Centre are described in SOP 4.1 to 6.4 presented in a separate document named “Approach-reading standard operating procedures”.

### **7.2.1. Radiographs**

#### **7.2.1.1. Radiography acquisition protocol**

Standardised radiographic techniques of the knees and hands will be used as described in [SOP 1.1](#) and [1.2](#).

The quality of image acquisition will be checked by the central reading facilities:

- for the knee at the screening and inclusion visits for each clinical site, except for subchondral bone analyses, for which the quality of the first three images from each clinical site will be controlled and after the first screening, the quality control could be done on a regular basis every second month, or every 30th examination, (another 3 images), whichever comes first,
- for the hands for the first 10 images from each clinical site. Afterwards this control will be performed on a regular basis.

#### **7.2.1.2. Central reading of radiographic images**

The radiographs will be centrally analysed in order to minimize the variability. The designated central readers will perform the central reading on on-going basis (KIDA evaluation) or at the end of the study depending on the methods.

Both knee radiographs, will be evaluated for joint damage using KIDA, the Kellgren and Lawrence grade, and OARSI grade ([Marijnissen, 2008](#); [Kellgren, 1957](#); [Altman, 2007](#)). Hand radiographs will be evaluated for osteoarthritic features using the Kellgren and Lawrence grade, OARSI grade and the Verbruggen-Veys score ([Kellgren, 1957](#); [Altman, 2007](#); [Verbruggen, 2000](#)).

Bone shape will be analysed by the Active Shape and Appearance Models which provide quantitative, spatial and temporal understanding of all the component tissues within a given joint. Subchondral bone analysis will be performed by fractal methods.

### **7.2.2. Magnetic Resonance Imaging (MRI) of the knee**

As the level of physical activity can influence the results of MRI, the level and time in the previous day of physical activity will be collected in the e-CRF.

#### **7.2.2.1. MRI of the index knee – acquisition protocol**

MRI images will be taken from patients’ index knee only (as defined at screening). Standardised MRI techniques of the knee will be used as described in detail in [SOP 2.1](#). Standardisation will be checked before inclusion of the first patients in consultancy with the centralised readers. All baseline images for MRI (except semi quantitative) will be checked for quality by the central readers immediately after acquisition. In case of insufficient quality, the patient will be requested to come back to the site for rescanning. In addition, 6 patients per site will be scanned twice with repositioning both at baseline and at M024 visits for

---

*APPROACH Clinical study protocol- Final version V1.0\_NL*

---

quantitative measurements to calculate the within study variability (test/retest reliability). This control will be performed for post baseline visits regularly.

In addition to the standard MRI techniques to evaluate osteoarthritic features in a quantitative and semi quantitative way (SOP 2.1), also novel exploratory imaging techniques will be performed to evaluate the additional value in prediction of OA progression in specific phenotypes. T2 images (SOP 2.2) give a quantitative measurement for assessing collagen distribution in the cartilage.

#### **7.2.2.2. Central reading of MRI exams**

Osteoarthritic features on MRI will be centrally analysed in order to minimize the variability. The designated central readers will perform the central reading on an on-going basis or at the end of the study. The semi-quantitative assessments readings will be performed towards the end of the study when all time points have been acquired and are available. These MRIs will be read in sequential order to allow for direct comparison and within-grade assessment.

The novel imaging marker T2-mapping, quantitative measurement for assessing collagen distribution, will be performed.

The novel exploratory method to analyse tissue shape on MRI, Active Shape and Appearance Models, will also be used on MRI image. It has been demonstrated that bone shape is:

- a) highly specific for the presence of OA and a sensitive measure of progression and
- b) a more responsive measure of progression than radiographic joint space width and MRI cartilage volume (Bowes, 2015).

#### **7.2.3. High resolution computed Tomography (CT) of the index knee and whole body low dose CT (WBLDCT)**

##### **7.2.3.1. CT of index knee and whole body CT- acquisition protocols**

High resolution CT of the index knee and whole body low dose CT will be performed according to SOP 3.1. These two examinations will be done without injection of contrast products.

The newest high resolution 3D CT imaging is fast, has extremely low radiation exposure within the range of one normal radiograph, has superior spatial resolution and is widely available.

A WBLDCT will be conducted to assess concomitant hip and/or lumbar and/or shoulder and/or IVD degeneration and/or facet OA. The whole body will be scanned within 10 seconds, with an effective radiation dose comparable to a combination of hip and spine radiographs, which approximately equals the yearly background radiation of 3 mSv.

The quality of image acquisition will be controlled immediately after each patient for the 10 first patients of each centre by the central reading centres. This control will be performed subsequently on a regular basis.

##### **7.2.3.2. Central reading of CT**

In order to minimize the variability, the high resolution CT and WBLDCT will be centrally analysed by the designated central reader. The high resolution CT and WBLDCT will be analyzed for the parameters as defined in the APPROACH study protocol. They will not be scored for any other diseases or abnormalities. Patients will be informed about this.

---

*APPROACH Clinical study protocol- Final version V1.0\_NL*

---

For bone architecture evaluation, advanced structure detection will be performed in 4 different volumes of interest, and includes bone mineral density, anisotropy, inhomogeneity, variogram slope and entropy. For shape analyses, statistical Shape Model (SSM) applications in OA using predefined landmarks on 2D or 3D images, produces a mean shape and modes of shape variation of this joint. Each mode is expressed numerically, where 0 denotes the mean shape, and negative and positive values represent the deviance in number of standard variations from this mean in either direction.

In WBLDCT using a slice thickness of less than 1 millimeter and iterative reconstruction it is possible to reconstruct high quality 3D data providing more detail than standard radiographs. Especially overlapping structures such as the hip and spine profit from the full 3D imaging: CT is needed for facet joint degeneration ([Pathria, 1987](#)) and CT assessment is superior compared to plain radiograph for IVD degeneration ([Alshamari, 2015](#)). The validated outcome scores based on literature exist for semi-quantitative grades on a 0-3 scale for JSN and osteophytosis, for disc degeneration and hip OA ([Lane, 1993](#) and [Turmezei, 2014](#)). For glenohumeral and facet joints, semi-quantitative grades on a 0-3 scale will be used to describe OA based on existing literature ([Weishaupt, 1999](#) and [Samilson, 1983](#)). A newly developed semi-quantitative grade will be used to describe acromioclavicular joint OA.

### **7.3. HandScan**

In order to assess concomittant hand involvement, OA related inflammation of the joints of both hands and wrists will be evaluated using the HandScan ([Meier, 2012](#) and [Van Onna 2013](#)) in 80 % of the patients (HandScan is available in 3 participating centers). A 2-3 min scan related to the local wrist and finger blood pooling and flow provides a direct measure for inflammation of joints. The HandScan will be used according to the HandScan Manual (see [SOP 8](#)).

The quality of data acquired will be controlled immediately after each patient for the 10 first patients of each centre. This control will be performed subsequently regularly. Relevant data will be transferred in the database of the APPROACH study.

### **7.4. Motion analysis**

In order to define gait characteristics, motion analysis will be performed using GaitSmart technique according to the manual ([SOP 9.1](#)). For acquisition, 6 sensors are attached to the patient, measuring knee and hip movement. Patients are asked to walk 20 metres at their own self-selected speed. The GaitSmart software reports the data within a couple of minutes. The GaitSmart doesn't interfere with the walking. Data will be transferred to the database of the APPROACH study.

### **7.5. Performance based test**

A 40-m self-paced walk test will be performed. Patients will be asked to walk as quickly but as safely as possible to a mark 10m away, return, and repeat until a total distance of 40m. Subjects are timed for this test and data are expressed as time (minutes) needed for this 40 m walking ([SOP 9.2](#)).

A 30 second chair stand-up test will be performed. Patients are asked to stand-up and sit down without use of their hands and arms from a chair. The number of times within 30 seconds a patients is able to stand up from the chair is used as outcome ([SOP 9.2](#)).

## **7.6. Questionnaires**

To evaluate the progression of OA in index knee, the KOOS, and the ICOAP questionnaires for knee will be used. The Pain NRS will also be used for both knees separately.

To assess involvement of other joints (as confounding factors), the HOOS and ICOAP will be used for the most painful or right hip, FIHOA for hands, and Pain NRS for both hips separately, both hands separately and lower back.

Pain DETECT and SF-36 are used to evaluate possible other causes of pain, that is depicted in the osteoarthritis specific questionnaires. One month diary to report pain intensity and pain medication taken will also be used.

All questionnaires are self-administered, will take about 30-45 minutes. They will be sent by the sites to the patients by post at least 4 weeks before the visit for M006, M012 and M024 and they should be completed at home and brought to the visit (at screening, the questionnaires will be distributed in the clinical centres and completed there; for inclusion, they will be given at the screening visit, and completed at home and brought to the inclusion visit).

### **7.6.1. Knee injury and Osteoarthritis Outcome Score (KOOS)**

The KOOS (Knee Injury and Osteoarthritis Outcome Score) is self-administered and assesses five outcomes: symptoms, stiffness, pain, activities of daily living, sport and recreation function, and knee-related quality of life (Roos, 1998; see [appendix 4](#)) and will be assessed for the index knee (defined at screening). At screening a reduced version of the KOOS will be used with assessment of three outcomes only: activities of daily living, stiffness and pain.

### **7.6.2. Hip disability and Osteoarthritis Outcome Score (HOOS)**

The HOOS is designed to assess patient-relevant outcomes in five separate subscales (pain, symptoms, activity of daily living, sport and recreation function and hip related quality of life; see [appendix 4](#)) and will be assessed for the most painful hip (in case of equally affected: for the right hip).

The Spanish version of the HOOS used in the study will be a non-validated version.

### **7.6.3. Intermittent and constant OA pain questionnaire (ICOAP) for the knee and the hip**

The ICOAP will be assessed for the index knee and the most painful hip (or the right hip in case equally affected). The ICOAP is designed to comprehensively evaluate the OA specific pain experience in people with hip or knee OA, including pain intensity, frequency, and impact on mood, sleep, and quality of life, independent of the effect of pain on physical function (Hawker, 2011; see [appendix 4](#)).

### **7.6.4. FIHOA (Functional Index for Hand OsteoArthritis) for both hands**

This index assesses the functional impact of hand osteoarthritis in everyday life, over the last 48 hours, on 10 daily activities involving both hands combined (Dreiser, 1995; see [appendix 4](#)). The patient is asked to answer each item using a 4-point verbal scale, from "possible without difficulty" (0) to "impossible" (3 points); thus, total scores range from 0 to 30.

---

*APPROACH Clinical study protocol- Final version V1.0\_NL*

---

**7.6.5. Numeric Rating Scale (NRS) for Pain for knees, hips, lower back and hands**

The pain NRS for knees, hips, lower back and hands will be assessed at rest. The pain NRS is a unidimensional measure of pain intensity, which has been widely used in diverse adult populations, including those with rheumatic diseases (Hawker, 2011; see appendix 4). At screening the pain NRS will be assessed right now and during the last week. At other visits, the pain NRS will be assessed during the last week only.

**7.6.6. Pain detect**

The painDETECT questionnaire is designed to identify the likelihood of a neuropathic pain component in patients with low back pain (Freynhagen, 2006) and is recommended for use by non-specialists (Gauffin, 2013) (see appendix 4).

**7.6.7. Short Form (36) Health Survey (SF-36)**

The questionnaire for Quality of Life (SF-36 - The Short Form (36) Health Survey) will be assessed to obtain information on vitality, physical functioning, bodily pain, general health perceptions, physical role functioning, emotional role functioning, social role functioning, mental health (see appendix 4).

**7.6.8. One month diary for pain intensity and pain medication taken**

A one-month paper diary to be completed at home (max 5 minutes a day) is used to record each day the presence of pain (yes/no) whatever the location and the consumption of pain relief drugs in order to assess whether the outcome of the different questionnaires are influenced by other pain and/ or pain medication (see appendix 4).

**7.7. Biological samples**

Blood and urine will be sampled according to SOP 10.1 to assess biochemical markers (*e.g.* markers related to cartilage degradation and bone metabolism as well as inflammation and metabolic status). Fasting condition and time of last meal will be recorded for urine sample collection and for blood sample collection. Fasting conditions are defined as no meals, including no sugar, no tea, no coffee for at least 8 hours and current medications are authorised if taken with water only. In addition, the level of physical activity within the last 24 hours and physiotherapy or spa activity within the last 72 hours before the blood collection will be recorded in the e-CRF as these activities can influence biochemical markers, metabolomics and lipidomics.

Patients will provide midstream urine samples, preferably the second morning void. Blood and urine samples will be processed at the clinical centres according to standardised protocol (SOP 10.2). Operations manuals have been produced defining the procedures for, storage/tracking/distribution (SOP 10.3) and logging/storage of biological specimens (SOP 10.4).

Biological samples are stored at the individual clinical sites and shipped on a regular basis to the central laboratories for analyses.

After analysis, the samples analysed will be destroyed at the latest after study end (=end of the consortium agreement).

---

*APPROACH Clinical study protocol- Final version V1.0\_NL*

---

**7.7.1. Biochemical markers**

All biochemical biomarkers will be analysed in central laboratories according to the standard operating procedures of the certified laboratories. Parameters associated with joint pathology and metabolism will be measured. The biological pathways of special interest for example are cartilage and bone metabolism (*e.g.* CTX-II), inflammation (*e.g.* C-reactive protein, pro-inflammatory cytokines), oxidative damage and antioxidant status (*e.g.* carotenoids, isoprostanes), and muscular anabolism (*e.g.* pro-collagen-3 N-terminal peptide). The most state-of-the-art analytic approach will be utilized to examine these pathways when the biological samples are analyzed at study end.

**7.7.2. Genomic (bio) markers**

Analyses of genomic markers (DNA, protein coding mRNAs, DNA CpG methylation, regulatory RNAs, circulating RNAs) is optional for the patient, by signing a separate informed consent form. This specific consent given to this analysis can be withdrawn separately at any moment without compromising the participation in the overall clinical study investigations.

One of the aims is to investigate associations between genomic markers and the investigated disease, knee osteoarthritis, to assess whether a phenotype of progressors has a different genomic profile from another progressor phenotype at baseline or at study end.

The samples will not be used for any investigations not specified in this protocol.

Blood samples will be taken in PAXgene tubes and stored for a maximum of 6 months according to protocol ([SOP 10.2](#)) at each clinical site. These anonymised blood tubes will be shipped to the central laboratories and processed according to the standard operating procedures of the laboratory.

**7.7.3. Sample storage**

Biological samples for future assessment of biomarkers in ancillary studies are collected at inclusion, 6-, 12-, and 24-month visits and will be stored in the central repository site. The objective of the ancillary studies will be in accordance with the objectives of the APPROACH study.

All remaining biological samples will be stored in the central repository site, Biostorage (Germany), for the duration of the consortium as defined in the consortium agreement. After ending the consortium agreement, samples will be relocated to the original institutes and stored to a maximum of 15 years at these institutes according to local regulations. They could be destroyed earlier on sponsor or patient request.

## **8. SAFETY REPORTING**

### **8.1. Adverse events and serious adverse events**

#### **8.1.1. Adverse events (AEs)**

An adverse event is defined as any health-related unfavourable or unintended medical occurrence that happens from the date the participant signs the information and consent form during the study. Only adverse events related to protocol procedures that are not related to standard diagnostic procedures used in clinical practice (viz. motion analyses), either reported spontaneously by the subject or observed by the investigator or his staff will be recorded in the e-CRF by the investigator. Each participant is instructed to report the occurrence of such adverse event at each visit.

#### **8.1.2. Serious adverse events**

A serious adverse event is any untoward medical occurrence or effect that:

- results in death;
- is life threatening (at the time of the event);
- requires hospitalisation or prolongation of existing inpatients' hospitalisation;
- results in persistent or significant disability or incapacity;
- is fetal damages or fetal death; or
- any other important medical event that did not result in any of the outcomes listed above due to medical or surgical intervention but could have been based upon appropriate judgement by the investigator.

Only SAEs related to protocol procedures that are not related to standard diagnostic procedures used in clinical practice (viz. motion analyses), will be recorded in the e-CRF.

The investigator will report only these SAEs to the sponsor without undue delay after obtaining knowledge of the events.

These serious adverse events will be reported to the approving ethics committee according to local regulations and the project's Ethical Advisory Board. Clinically relevant medical findings will be reported by the local investigator to the treating physician.

The sponsor will report these SAEs through the web portal ToetsingOnline to the accredited METC that approved the protocol, within 7 days of first knowledge for these SAEs that result in death or are life threatening followed by a period of maximum of 8 days to complete the initial preliminary report. All other SAEs related to protocol procedures will be reported within a period of maximum 15 days after the sponsor has first knowledge of the serious adverse events.

### **8.2. Safety considerations for Radiograph, knee high resolution CT and WBLDCT examinations**

As part of knees and hands Radiograph, high resolution CT of the index knee and WBLDCT evaluations, subjects are exposed to radiation.



*APPROACH Clinical study protocol- Final version V1.0\_NL***Table (8.2) 1 - Effective dose for the knee and hand radiographs, knee high resolution CT and WBLDCT (in mSv per visit)**

|                                             | Screening     | Inclusion/M000 | M006          | M012          | M024          |
|---------------------------------------------|---------------|----------------|---------------|---------------|---------------|
| radiograph index knee                       | 0.0002        | -              | 0.0002        | 0.0002        | 0.0002        |
| radiograph other knee                       |               | 0.0002         | -             | -             | 0.0002        |
| QCT index knee                              |               | 0.25           |               |               | 0.25          |
| Radiograph both hands                       |               | 0.0002         | -             | -             | 0.0002        |
| WBLDCT                                      |               | 3              |               |               | 3             |
| <b>Total effective dose (mSv) per visit</b> | <b>0.0002</b> | <b>3.2504</b>  | <b>0.0002</b> | <b>0.0002</b> | <b>3.2506</b> |

The overall radiation exposure during the whole study will be approximately 6.5 mSv. This is much lower than a standard clinical CT of the pelvis ( $\approx 10$  mSv).

### 8.3. Safety considerations for MRI

MRI imaging uses non-ionizing radiation and is safe when used on subjects who are screened for contraindications. Procedures need to be followed according to guidelines/SOPs of each clinical site.

### 8.4. Responsibilities of the investigator

For any adverse event related to protocol procedures whatever the seriousness, the investigator must:

- **Note in the participant's medical file** the date on which he/she learned of the event (at a follow-up visit or a telephone contact with the participant or a third person, ...) and any other relevant information which he/she has learned of the event,
- **Report the Serious Adverse event to the sponsor** using the AE form,
  - Evaluate the intensity,
  - **Document** the event with additional useful information,
  - Ensure the follow-up of the event,
- **Fulfil his/her regulatory obligations** to the Competent Authorities and/or to the IRB/IEC, in accordance with local regulations.

### 8.5. Responsibilities of the sponsor

In accordance with international guidances, the assessment of the seriousness of adverse events is made by the investigator. The sponsor is responsible for ensuring that all serious adverse events related to protocol procedures are reported to Competent Authorities and Ethics Committees. The actual country specific reporting per country is delegated to the principal investigators of the clinical sites.

## 9. STATISTICS

### 9.1. Statistical analysis

The statistical analysis will be described in a statistical analysis plan prepared before the database lock.

#### Validation of prediction model used in the inclusion process (primary objective)

The model based on the existing cohort data, developed to predict radiographic and symptomatic progression from the screening visit data, will be evaluated using the 2-year follow-up outcomes observed in the APPROACH cohort. The predictions made by the model that informed the patient inclusion process, will be compared against the progression measured over the 2 years period. In a previous phase of the project separate prediction models have been developed for the outcome persistent pain (yes/no), structural progression, based on JSW narrowing (yes/no), and both (yes/no) or both not (yes/no) using machine learning techniques. These models use the 15 variables as measured during screening phase of the prospective cohort study. The model predictions will be combined to derive predictions for primary outcome of the study (the 4 categories of progression: pain, structural, structural and pain, , no progression). The ability of the model to discriminate between progressors and non-progressors (discrimination) will be assessed using AUC-ROC analysis (separate for pain and structural progression outcome). Calibration of the combined model will be performed using the prospective cohort data by comparing the predicted outcomes (1 of the 4 categories) with the observed outcome after 2 years. To evaluate whether updating the model is needed and the extensiveness of updating to improve predictions in the new patient sample and balancing this with the risk of overfitting we will consider the methods as described in Vergouwe et al. Stat Med 2016.

#### Development and validation of a predictive model for OA progression (secondary objective)

The algorithm used to build a predictive machine learning model, will use as input the patient characteristics (including conventional and novel clinical, imaging, and biochemical markers as described in paragraph 5.1.2.) at baseline and/or change over short-term follow-up, and provide a prediction of the outcome at 2 year follow-up (radiographic/symptomatic OA progression or no progression). To train the model, a supervised approach will be used, in which the known outcomes of a subset of the APPROACH cohort population will be used as guidance. The rest of the patients will be used as a test, to verify the model's ability to generalise and perform prediction on cases not seen in training (e.g. using 10-fold cross-validation).

When an extended or new model is developed in the cohort, again the discrimination and calibration will be assessed as described for the primary outcome (internal validation). The prediction model used in the selection process will also be refitted in the prospective cohort and a limited set of additional variables (based on the ability to evaluate (new) predictors with the observed number of events in the cohort) will be added to the model. Their added predictive value will be assessed using up-to-date methods like the net reclassification index (NRI, see i.e. Xanthakis et al. Stat Med 2014) and an optimal model will be selected. External validation of these models (not part of the present project) will then be needed for implementation in practice.

---

*APPROACH Clinical study protocol- Final version V1.0\_NL*

---

To mitigate the stochastic aspect of the machine learning algorithm, multiple models will be trained and verified at once, and the one with typical behaviour (median performer) will be selected as a point of reference and further used in the phenotype discovery.

#### Discovery of phenotypes (exploratory objective)

The set of patients with radiographic progression (e.g. based on minimum total JSW loss) and/or symptomatic progression (based on minimum clinically important difference in pain) will be explored to define groups that share common characteristics. First, we will perform a clustering analysis to identify phenotypes based on similarities between the patients (at the level of patient characteristics including conventional and novel imaging or biochemical markers). Next, we will build a predictive machine learning model, able to distinguish between progressive and non-progressive cases, then extract from the model structure the patterns used to describe patients, and finally analyse similarities between these descriptions to identify phenotypes.

A machine learning algorithm best for this purpose, will be selected through experimental evaluation of several supervised learning methods with interpretable representation, such as decision trees, random forest, rule-based evolutionary learning or modern neural networks approaches.

The final set of phenotypes of clinical interest (such as post-traumatic, metabolic, ageing, inflammatory, bone driven, genetic) will be selected in discussion with clinical experts and described in enough detail to be of use in practical OA diagnosis and patient selection.

#### Description of OA progression in existing and novel phenotypes (exploratory objective)

OA progression of the index knee will be described over a period of 2 years for the identified subgroups. Changes from baseline to the 1- and 2-year will be evaluated graphically and by using descriptive statistics (mean with standard deviation, median with interquartile range or number of patients and proportions). OA progression is based on structural changes and/or changes in pain and function and evaluated by use of conventional and novel clinical, imaging, and biochemical (bio)markers as described in 5.1.1.

Statistical analysis will be defined in a statistical analysis plan before the database lock.

### **9.2. Determination of sample size**

Although the number of subjects in the APPROACH cohort is limited by external factors (e.g. the actual number of fast progressors in the existing cohorts), it is important to ensure that the APPROACH cohort is large enough to be useful for analysis of the primary objective. We would like a guarantee that the cohort is large enough to effectively learn from the data and make better than chance predictions.

To estimate the minimum cohort size required to achieve this, we used a training set of 10 random subsets of subjects from the CHECK cohort. For each subset we maintained the class proportions observed in the projection of the recruitment strategy for including 100 CHECK subjects (34% **N**, 37% **P**, 9% **S**, 20% **P+S**). Then we constructed 20 *surrogate training sets* with randomised class labels, where the link between the attribute values and the class a patient belongs to is destroyed. Finally, we compared the prediction quality on both original

---

 APPROACH Clinical study protocol- Final version V1.0\_NL
 

---

and surrogate data. With this experiment setup, we expected to obtain a better result on the original data by chance with the probability of only:  $p = 1/(20+1) < 5\%$ .

To test the prediction quality, we used a 10-fold cross-validation procedure. For each fold we trained 25 random forest models and we measured their predictive performance with the weighted  $F_1$  score (which considers precision (also called positive predictive value) and recall (also called sensitivity) and is applicable to multi-class problems). The figure below shows the difference in performance on the original and the surrogate data for 10 random subsets of subjects. The difference in performance was statistically significant (at  $\alpha=0.05$  level) when the number of subjects in the training set reached 180. Thus, assuming an anticipated dropout rate of 20%, the minimum sample size for the study is 225. The planned number of 300 patients is therefore anticipated to be sufficient for the study purpose and allows for some variation in the actual distribution of progression categories in the APPROACH cohort.

**Figure (9.2) 1 - Permutation test**

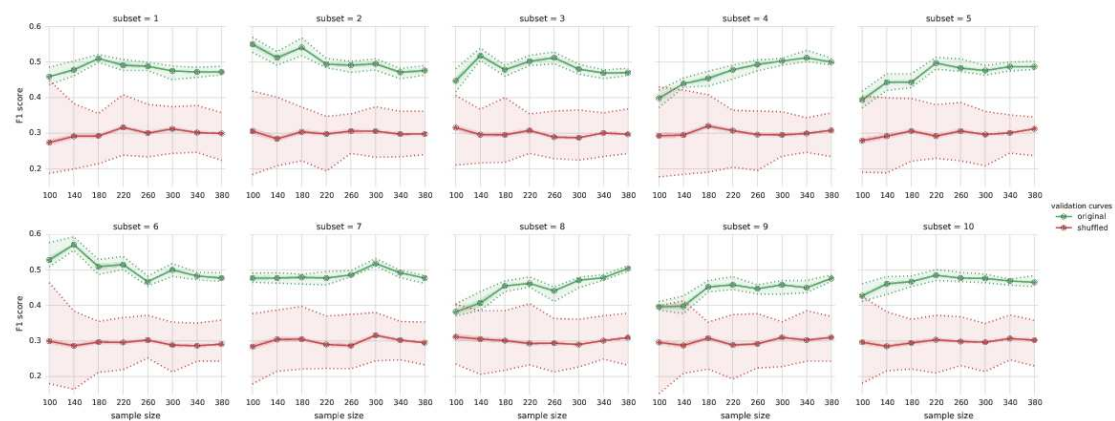

(The line plot shows the median prediction score, with area plot showing range between minimum and maximum value. Horizontal axis shows the number of samples in the training set.)

## 10. DIRECT ACCESS TO SOURCE DATA / DOCUMENTS

The investigator will allow the monitors from the Institut de Recherches Internationales Servier (I.R.I.S.), the sponsor, the persons responsible for audits, the representatives of the IRB/IEC, and of the Competent Authorities to have direct access to source data / documents.

## 11. QUALITY CONTROL AND QUALITY ASSURANCE

The study monitoring will be performed by I.R.I.S in order to ensure compliance with ICH GCP, local regulations and protocol requirements, and to conduct source data verification and review

## **12. ETHICAL CONSIDERATIONS**

### **12.1. Institutional Review Board(s)/Independent Ethics Committee(s)**

The study protocol, the "Participant information and consent form" document, the insurance documents, will be submitted to (an) IRB(s)/IEC(s) by the sponsor in the Netherlands. The submission in the participating countries will be performed by the investigator(s) in accordance with local regulations.

The study will not start in a centre before written approval by corresponding IRB/IEC(s) has been obtained, the local regulatory requirements have been complied with, and the signature of the clinical study protocol of each contractual party involved has been obtained.

### **12.2. Study conduct**

The study will be performed in accordance with the ethical principles stated in the Declaration of Helsinki 1964, as revised in Fortaleza, 2013 and in accordance with the Medical Research Involving Human Subjects Act (WMO).

### **12.3. Recruitment and informed consent**

Pre-identified patients potentially fulfilling the inclusion and exclusion criteria including eligibility to one of the defined phenotypes based on the algorithms for identification will be selected from the existing European cohorts and additional institutional databases if needed.

The responsible investigator of the cohort will send (on behalf of the treating physician if needed in case of lack of previous consent) a letter to the patient to inform him/her about the longitudinal APPROACH study and to ask him/her whether he/she would like to receive more information about the study. The patient may reply that he/she is or is not interested by letter, email or phone. If no such reply is obtained within 2 weeks the investigator or his/her delegate of the APPROACH study will call the patient to ask whether he/she received the letter and whether he/she is interested in the study. Patients who are interested in participation will be informed of the screening procedure, objectives, benefits, risks and requirements imposed by the study. The patient will be asked by the investigator or his/her delegate to participate in the longitudinal APPROACH study.

If the patient is willing to participate, the patient will be provided with an information and consent form by post and an appointment for a screening visit is made. The patient may seek further details of the study, and may change his or her mind about participating in the study.

At the beginning of the screening visit, investigator and patient both sign informed consent, and thereafter the screening measurements will be performed. Based on the outcomes patients are excluded or patients are scheduled for an inclusion/M000 visit within 2 months. These patients will be informed that they still may be excluded based on evaluation of their screening's data. Based on final evaluation of inclusion criteria (*a.o.* image analyses for JSW measurement) the decision will be made whether the patient can be included in the longitudinal cohort study. The scheduled inclusion visit will take place or will be cancelled accordingly, with explanation to the patient.

---

*APPROACH Clinical study protocol- Final version V1.0\_NL*

---

Two original information and consent forms must be completed, dated and signed personally by the participant and by the person responsible for collecting the informed consent. The participant will be given one signed original information and consent form, the second original will be kept by the investigator.

### **13. DATA HANDLING AND RECORD KEEPING**

#### **13.1. Data Handling**

##### **13.1.1. e-CRF**

An electronic data capture system is going to be used for this study. An electronic case report form (e-CRF) is designed to record the data required by the protocol and collected by the investigator.

The e-CRF will be produced by I.R.I.S. in compliance with its specifications. The investigator or a designated person from his/her team will be trained for the use of the e-CRF by an e-learning prepared by I.R.I.S.

Data entry at the investigator's site will be performed by the investigator or by the designated person from his/her team after completion of the participant's Medical File.

Upon entry, data will be transmitted via the Internet from the study centre to the IRIS database.

The investigator or the designated person from his/her team agrees to complete the e-CRF, at each participant visit, and all other documents provided by the sponsor.

The e-CRF should be completed within 2 weeks after the visit of participant and before the next scheduled visit. The informed consent approval and date need to be reported at the soonest in the e-CRF after informed consent signature of the patient.

All corrections of data on the e-CRF must be made by the investigator or by the designated person from his/her team using electronic data clarifications according to the provided instructions. All data modification will be recorded using the audit trail feature of the software, including date, reason for modification and identification of the person who has made the change.

In order to ensure confidentiality and security of the data, usernames and passwords will be used to restrict system access to authorised personnel only, whether resident within the investigator's sites, the sponsor or third parties.

Data will be verified in accordance with the monitoring strategy defined for the study. After comparing these data to the source documents, the monitor will request correction / clarification from the investigator using electronic data clarifications that should be answered and closed as quickly as possible.

Data can be frozen during the study after their validation. However the investigator has the possibility to modify data if deemed necessary via a request to the sponsor.

After the last visit of the participant, the investigator or co-investigator must attest the authenticity of the data collected in the e-CRF by entering his/her user name and password.

##### **13.1.2. Central reading**

The investigational sites will anonymise and upload images to the central XNAT platform, at the specific visit location (see [SOP 7](#)). Post-acquisition anonymized radiographs, MRI exams, high resolution CT, and LWBCT should be sent as soon as possible to the XNAT platform:

---

*APPROACH Clinical study protocol- Final version V1.0\_NL*

---

- for the index knee radiographs at screening and the remaining first 10 images of each acquisition technique at each clinical site **within 48 hours** for direct quality check,
- for all remaining images **within one month**.

Data from centralised image reading will be recorded in tranSMART. No data will be transferred to IRIS database.

Data from blood and urine biochemical markers and genomic markers analysis, as well as motion analysis and hand scan, will be recorded in tranSMART. Locally (at central readers location) a copy of these databases will exist prior to the transfer to tranSMART. No data will be transferred to IRIS clinical database.

Data transfers between the central readers and tranSMART will be done according to a specification manual describing the process (see [SOP 7](#)).

### **13.2. Source data**

All source clinical data will be kept in the patient medical files in the clinical centres. There are no data to be recorded directly on the e-CRF and to be considered as source data.

Questionnaires filled out by the patients and data reported by the patients (*i.e.* KOOS, HOOS, ICOAP, FIHOA, NRS, Pain detect, SF36, one month diary for pain intensity and pain killers) will be considered as source data. For these parameters, no entry in the e-CRF will be performed except at the screening visit for the reduced version of the KOOS and the two NRS. The other questionnaires will be sent by the site regularly to the data management department of I.R.I.S. (Institut de Recherches Internationales Servier, Suresnes, France) which is responsible for data entry in the clinical database of APPROACH at I.R.I.S.. This data entry will be manual (see paragraph [13.3](#)).

Source data and source documents of the centre should be clearly identified in a specific, detailed and signed document before the beginning of the study. Source data and source documents will be kept as electronic or as written records. The following data will be considered as source documents: patient's medical file, all examinations and reports (laboratory, radiographs, MRI, etc.), patient's questionnaires.

## APPROACH Clinical study protocol- Final version V1.0\_NL

Figure (13.2) 1 - Data processing

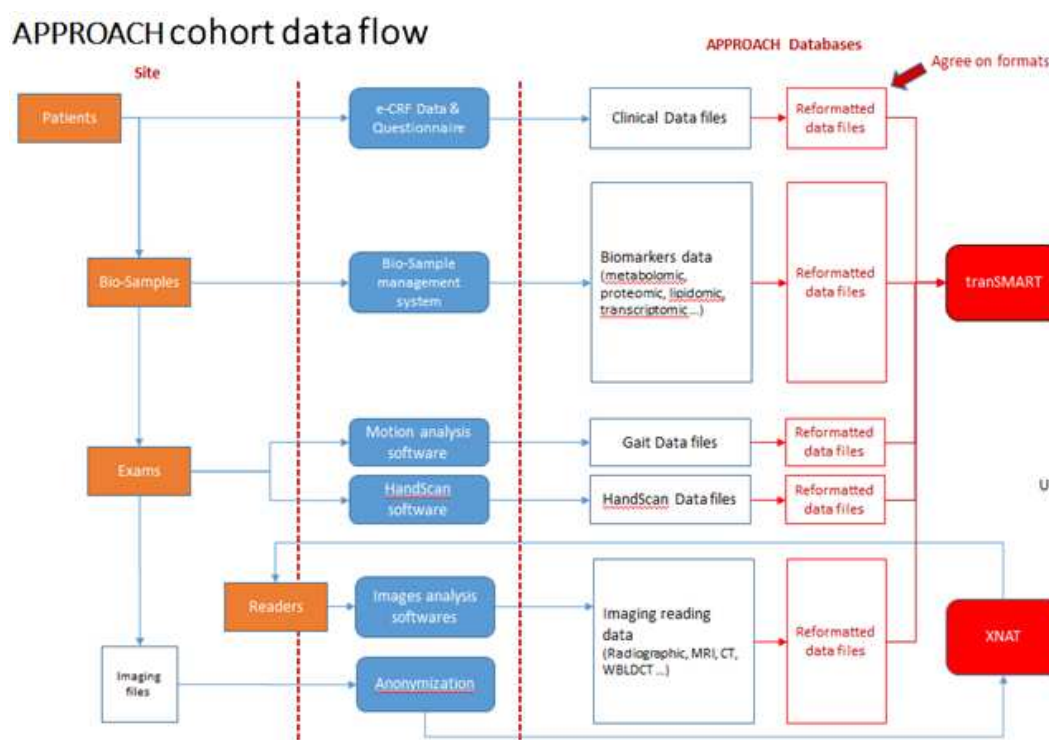

### 13.3. Data management

For data collected on the e-CRF, the Data & Clinical Logistics division of I.R.I.S., is responsible for data processing including data validation performed according to a specification manual describing the checks to be carried out. As a result of data validation, data may require some changes. An electronic data clarification form is sent to the investigator who is required to respond to the query and make any necessary changes to the data.

For data collected on paper form (Questionnaires as KOOS, SF-36, one month pain diary....) the Data & Clinical Logistics division of I.R.I.S., is responsible for data processing including: independent, blind, double data entry with a third person resolving any discrepancy between first and second entry.

The Medical Data Department of I.R.I.S. or CRO if subcontracted is responsible for data coding including:

- medical / surgical history, adverse events and procedures related to adverse events using MedDRA,
- medications using WHO-DD.

The coding process is described in a specification manual.

When data validation is achieved, a review of the data is performed according to I.R.I.S. standard operating procedure. When the IRIS clinical database has been declared to be complete and accurate, it will be locked and will be then transferred into tranSMART for analysis.



---

*APPROACH Clinical study protocol- Final version V1.0\_NL*

---

**13.4. Archiving**

The investigator will keep all information relevant to the study for at least 15 years after the end of the study, or more if specified by the local regulation.

At the end of the study, the investigator will be provided with a copy of each participant's data on a CD-ROM support. These data include the completed e-CRF, all (electronic) CRFcomments, history of all queries, complete signature history and the full audit trail reports.

**14. INSURANCE**

The sponsor and all participating investigators have a liability insurance which is in accordance with local legal requirements.

For the participating centers in the Netherlands, the sponsor has an insurance which is in accordance with the legal requirements in the Netherlands (Article 7 WMO). This insurance provides cover for damage to research subjects through injury or death caused by the study. The insurance applies to the damage that becomes apparent during the study or within 4 years after the end of the study.

For the participating centers in the other European countries, their local insurance which is in accordance with local legal requirements, is applied.

**15. OWNERSHIP OF THE RESULTS - DISSEMINATION POLICY****15.1. Ownership of the results**

Results of the clinical study shall be jointly owned by all parties according to rules of co-ownership of foreground in accordance to article 12 of the APPROACH Consortium Project Agreement.

**15.2. Dissemination policy**

Dissemination of information relating to the results arising from the study will be according article 20 of the APPROACH Consortium Project Agreement.

**15.3. Administrative clauses concerning the sponsor and the investigator****15.3.1. Persons to inform**

In accordance with local regulations, the investigator and/or the sponsor will inform the Director of the medical institution about the study.

**15.3.2. Substantial protocol amendment, amended protocol and modification of informed consent**

If the protocol or informed consent forms must be altered after it has been signed, the modification or substantial amendment must be discussed and approved by the investigator or

---

*APPROACH Clinical study protocol- Final version V1.0\_NL*

---

the coordinator and the sponsor. The substantial protocol amendment must be signed by both parties. Both documents must be kept with the initial protocol.

All substantial amendments and corresponding amended protocols and informed consent forms must be sent by the sponsor and for the participating centers by the investigator(s), in accordance with local regulations, to the IRB/IEC that examined the initial protocol. They can only be implemented after a favourable opinion of the IRB/IEC has been obtained, local regulatory requirements have been complied with, and the amended protocol has been signed, with the exception of a measure required to eliminate an immediate risk to the study participants. Each participant affected by the amendment of the informed consent must complete, date and sign two originals of the new version of the informed consent form together with the person who conducted the informed consent discussion. He/she will receive one signed original amendment to the informed consent form.

When the submission is performed by the investigator or the coordinator, the latter must transmit a copy of IRB/IEC's new written opinion to the sponsor, immediately upon receipt.

Furthermore, the substantial amendment, amended protocol and informed consent are to be submitted to the Competent Authorities in accordance with local regulations.

### **15.3.3. Final study report**

The study report will be drafted by the consortium partners in compliance with the intentions of the goal of the APPROACH project.

All consortium partners must agree on the final version.

## **15.4. Concerning the investigator**

### **15.4.1. Confidentiality - Use of information**

All documents and information given to the investigator by the sponsor with respect to the APPROACH study are strictly confidential as according to the consortium agreement and the trial agreement between sponsor and investigator.

A participant screening log and inclusion list will be completed and kept by the investigator who should agree to provide access on site to the auditor and/or the representatives of the Competent Authorities. The information will be treated in compliance with professional secrecy.

The participant screening log must be completed from the moment the investigator checks that a participant could potentially participate in the study.

### **15.4.2. Documentation supplied to the sponsor**

The investigator undertakes before the study begins:

- to provide his/her dated and signed English Curriculum Vitae (CV) (maximum 2 pages) or to complete in English the CV form provided by the sponsor and to send it to the sponsor, together with that of his/her co-investigator(s),
- to send (if appropriate), a copy of the IRB/IEC's opinion with details of its composition and the qualifications of its constituent members.

---

*APPROACH Clinical study protocol- Final version V1.0\_NL*

---

The CVs of other members of the team involved in the study (if possible in English) will be collected during the course of the study (at least, members involved in the participants' medical follow-up/study-related decision process and persons involved in the measurement of main assessment criteria).

## 16. REFERENCES

### Other regulatory references:

Alshamari M, Geijer M, Norrman E, Lidén M, Krauss W, Wilamowski F, Geijer H. Low dose CT of the lumbar spine compared with radiography: a study on image quality with implications for clinical practice. *Acta Radiol.* 2015 [Epub ahead of print]

Altman RD1, Gold GE. Atlas of individual radiographic features in osteoarthritis, revised. *Osteoarthritis Cartilage.* 2007;15 Suppl A:A1-56.

Bijlsma JW, Berenbaum F, Lafeber FP. Osteoarthritis: an update with relevance for clinical practice. *Lancet.* 2011;377(9783):2115-26.

Bowes MA, Vincent GR, Wolstenholme CB, Conaghan PG. A novel method for bone area measurement provides new insights into osteoarthritis and its progression. *Ann Rheum Dis.* 2015;74(3):519-25.

Charlson ME, Pompei P, Ales KL, MacKenzie CR. A new method of classifying prognostic comorbidity in longitudinal studies: development and validation. *J Chronic Dis.* 1987;40(5):373-83.

Doyle DV, Dieppe PA, Scott J, Huskisson EC. An articular index for the assessment of osteoarthritis. *Ann Rheum Dis.* 1981 Feb;40(1):75-8.

Dreiser RL, Maheu E, Guillou GB, Caspard H, Grouin JM. Validation of an algofunctional index for osteoarthritis of the hand. *Rev Rhum Engl Ed.* 1995 62(6 Suppl 1):43S-53S.

Felson D, Niu J, Sack B, Aliabadi P, McCullough C, Nevitt MC. Progression of osteoarthritis as a state of inertia. *Ann Rheum Dis.* 2013;72(6):924-9.

Freyenhagen R, Baron R, Gockel U, Tölle TR. PainDETECT: a new screening questionnaire to identify neuropathic components in patients with back pain. *Curr Med Res Opin.* 2006 Oct;22(10):1911-20.

Gauffin J, Hankama T, Kautiainen H, Hannonen P, Haanpää M. Neuropathic pain and use of PainDETECT in patients with fibromyalgia: a cohort study. *BMC Neurol.* 2013 Feb 14;13:21.

Hawker GA, Mian S, Kendzerska T, French M. Measures of adult pain: Visual Analog Scale for Pain (VAS Pain), Numeric Rating Scale for Pain (NRS Pain), McGill Pain Questionnaire (MPQ), Short-Form McGill Pain Questionnaire (SF-MPQ), Chronic Pain Grade Scale (CPGS), Short Form-36 Bodily Pain Scale (SF-36 BPS), and Measure of Intermittent and Constant Osteoarthritis Pain (ICOAP). *Arthritis Care Res (Hoboken).* 2011;63 Suppl 11:S240-52.

Kellgren JH and Lawrence JS. Radiological assessment of osteoarthrosis. *Ann Rheum Dis.* 1957;16:494.

Lane NE, Nevitt, MC, Genant, HK, & Hochberg MC (1993). Reliability of new indices of radiographic osteoarthritis of the hand and hip and lumbar disc degeneration. *The Journal of Rheumatology*, 20(11), 1911–8.

Marijnissen AC, Vincken KL, Vos PA, Saris DB, Viergever MA, Bijlsma JW, Bartels LW, Lafeber FP. *Osteoarthritis Cartilage.* 2008 Feb;16(2):234-43.

Meier AJ, Rensen WH, de Bokx PK, de Nijs RN. Potential of optical spectral transmission measurements for joint inflammation measurements in rheumatoid arthritis patients. *J Biomed Opt.* 17: 081420, 2012.

---

*APPROACH Clinical study protocol- Final version V1.0\_NL*

---

Pathria M, Sartoris DJ, Resnick D. Osteoarthritis of the facet joints: accuracy of oblique radiographic assessment. *Radiology*. 1987;164(1):227-30.

Roos EM, Roos HP, Lohmander LS, Ekdahl C, Beynnon BD. Knee Injury and Osteoarthritis Outcome Score (KOOS)--development of a self-administered outcome measure. *J Orthop Sports Phys Ther*. 1998 28(2):88-96.

Samilson, RL, Prieto, V, & D, M (1983). Dislocation arthropathy of the shoulder. *The Journal of Bone and Joint Surgery*. American Volume, 65(4), 456–60.

Turmezei TD, Fotiadou A, Lomas DJ, Hopper MA, and Poole KES. “A new CT grading system for hip osteoarthritis,” *Osteoarthr. Cartil.*, vol. 22, no. 10, pp. 1360–1366, 2014.

Van Onna M, ten Cate D, Tsoi K, Meier A, Jacobs JWG, Westgeest A, Meijer P, van Beek M, Rensen WHJ, et al., “Assessment of disease activity in patients with rheumatoid arthritis using optical spectral transmission measurements, a non-invasive operator-independent imaging technique.” *Annals of the Rheumatic Diseases* 72: 751, 2013.

Verbruggen G, Veys EM. Erosive and non-erosive hand osteoarthritis. Use and limitations of two scoring systems. *Osteoarthritis Cartilage*. 2000;8 Suppl A:S45-54.

Weishaupt D, Zanetti M, Boos N, and Hodler J. “MR imaging and CT in osteoarthritis of the lumbar facet joints,” *Skeletal Radiol.*, vol. 28, no. 4, pp. 215–219, 1999.

---

*APPROACH Clinical study protocol- Final version V1.0\_NL*

**17. APPENDICES**

**Appendix 1: World Medical Association Declaration of Helsinki**  
**WORLD MEDICAL ASSOCIATION DECLARATION OF HELSINKI**  
**Ethical Principles for Medical Research Involving Human Subjects**

Adopted by the 18th WMA General Assembly, Helsinki, Finland, June 1964, and amended by the:  
29th WMA General Assembly, Tokyo, Japan, October 1975  
35th WMA General Assembly, Venice, Italy, October 1983  
41st WMA General Assembly, Hong Kong, September 1989  
48th WMA General Assembly, Somerset West, Republic of South Africa, October 1996  
52nd WMA General Assembly, Edinburgh, Scotland, October 2000  
53th WMA General Assembly, Washington DC, USA, 2002 (Note of Clarification added)  
55th WMA General Assembly, Tokyo, Japan, 2004 (Note of Clarification added)  
59th WMA General Assembly, Seoul, Republic of Korea, October 2008  
64th WMA General Assembly, Fortaleza, Brazil, October 2013

**Preamble**

1. The World Medical Association (WMA) has developed the Declaration of Helsinki as a statement of ethical principles for medical research involving human subjects, including research on identifiable human material and data.  
  
The Declaration is intended to be read as a whole and each of its constituent paragraphs should be applied with consideration of all other relevant paragraphs.
2. Consistent with the mandate of the WMA, the Declaration is addressed primarily to physicians. The WMA encourages others who are involved in medical research involving human subjects to adopt these principles

**General Principles**

3. The Declaration of Geneva of the WMA binds the physician with the words, "The health of my patient will be my first consideration," and the International Code of Medical Ethics declares that, "A physician shall act in the patient's best interest when providing medical care."
4. It is the duty of the physician to promote and safeguard the health, well-being and rights of patients, including those who are involved in medical research. The physician's knowledge and conscience are dedicated to the fulfilment of this duty.
5. Medical progress is based on research that ultimately must include studies involving human subjects.
6. The primary purpose of medical research involving human subjects is to understand the causes, development and effects of diseases and improve preventive, diagnostic and therapeutic interventions (methods, procedures and treatments). Even the best proven interventions must be evaluated continually through research for their safety, effectiveness, efficiency, accessibility and quality.

---

*APPROACH Clinical study protocol- Final version V1.0\_NL*

---

7. Medical research is subject to ethical standards that promote and ensure respect for all human subjects and protect their health and rights.
8. While the primary purpose of medical research is to generate new knowledge, this goal can never take precedence over the rights and interests of individual research subjects.
9. It is the duty of physicians who are involved in medical research to protect the life, health, dignity, integrity, right to self-determination, privacy, and confidentiality of personal information of research subjects. The responsibility for the protection of research subjects must always rest with the physician or other health care professionals and never with the research subjects, even though they have given consent.
10. Physicians must consider the ethical, legal and regulatory norms and standards for research involving human subjects in their own countries as well as applicable international norms and standards. No national or international ethical, legal or regulatory requirement should reduce or eliminate any of the protections for research subjects set forth in this Declaration.
11. Medical research should be conducted in a manner that minimises possible harm to the environment.
12. Medical research involving human subjects must be conducted only by individuals with the appropriate ethics and scientific education, training and qualifications. Research on patients or healthy volunteers requires the supervision of a competent and appropriately qualified physician or other health care professional.
13. Groups that are underrepresented in medical research should be provided appropriate access to participation in research.
14. Physicians who combine medical research with medical care should involve their patients in research only to the extent that this is justified by its potential preventive, diagnostic or therapeutic value and if the physician has good reason to believe that participation in the research study will not adversely affect the health of the patients who serve as research subjects.
15. Appropriate compensation and treatment for subjects who are harmed as a result of participating in research must be ensured.

**Risk, Burdens and Benefits**

16. In medical practice and in medical research, most interventions involve risks and burdens.  
  
Medical research involving human subjects may only be conducted if the importance of the objective outweighs the risks and burdens to the research subjects.



---

*APPROACH Clinical study protocol- Final version V1.0\_NL*

---

17. All medical research involving human subjects must be preceded by careful assessment of predictable risks and burdens to the individuals and groups involved in the research in comparison with foreseeable benefits to them and to other individuals or groups affected by the condition under investigation.

Measures to minimise the risks must be implemented. The risks must be continuously monitored, assessed and documented by the researcher.

18. Physicians may not be involved in a research study involving human subjects unless they are confident that the risks have been adequately assessed and can be satisfactorily managed.

When the risks are found to outweigh the potential benefits or when there is conclusive proof of definitive outcomes, physicians must assess whether to continue, modify or immediately stop the study.

### **Vulnerable Groups and Individuals**

19. Some groups and individuals are particularly vulnerable and may have an increased likelihood of being wronged or of incurring additional harm.

All vulnerable groups and individuals should receive specifically considered protection.

20. Medical research with a vulnerable group is only justified if the research is responsive to the health needs or priorities of this group and the research cannot be carried out in a non-vulnerable group. In addition, this group should stand to benefit from the knowledge, practices or interventions that result from the research.

### **Scientific Requirements and Research Protocols**

21. Medical research involving human subjects must conform to generally accepted scientific principles, be based on a thorough knowledge of the scientific literature, other relevant sources of information, and adequate laboratory and, as appropriate, animal experimentation. The welfare of animals used for research must be respected.

22. The design and performance of each research study involving human subjects must be clearly described and justified in a research protocol.

The protocol should contain a statement of the ethical considerations involved and should indicate how the principles in this Declaration have been addressed. The protocol should include information regarding funding, sponsors, institutional affiliations, potential conflicts of interest, incentives for subjects and information regarding provisions for treating and/or compensating subjects who are harmed as a consequence of participation in the research study.

In clinical trials, the protocol must also describe appropriate arrangements for post-trial provisions.

**Research Ethics Committees**

23. The research protocol must be submitted for consideration, comment, guidance and approval to the concerned research ethics committee before the study begins. This committee must be transparent in its functioning, must be independent of the researcher, the sponsor and any other undue influence and must be duly qualified. It must take into consideration the laws and regulations of the country or countries in which the research is to be performed as well as applicable international norms and standards but these must not be allowed to reduce or eliminate any of the protections for research subjects set forth in this Declaration.

The committee must have the right to monitor on-going studies. The researcher must provide monitoring information to the committee, especially information about any serious adverse events. No amendment to the protocol may be made without consideration and approval by the committee. After the end of the study, the researchers must submit a final report to the committee containing a summary of the study's findings and conclusions.

**Privacy and Confidentiality**

24. Every precaution must be taken to protect the privacy of research subjects and the confidentiality of their personal information.

**Informed Consent**

25. Participation by individuals capable of giving informed consent as subjects in medical research must be voluntary. Although it may be appropriate to consult family members or community leaders, no individual capable of giving informed consent may be enrolled in a research study unless he or she freely agrees.
26. In medical research involving human subjects capable of giving informed consent, each potential subject must be adequately informed of the aims, methods, sources of funding, any possible conflicts of interest, institutional affiliations of the researcher, the anticipated benefits and potential risks of the study and the discomfort it may entail, post-study provisions and any other relevant aspects of the study. The potential subject must be informed of the right to refuse to participate in the study or to withdraw consent to participate at any time without reprisal. Special attention should be given to the specific information needs of individual potential subjects as well as to the methods used to deliver the information.

After ensuring that the potential subject has understood the information, the physician or another appropriately qualified individual must then seek the potential subject's freely-given informed consent, preferably in writing. If the consent cannot be expressed in writing, the non-written consent must be formally documented and witnessed.

All medical research subjects should be given the option of being informed about the general outcome and results of the study.

---

*APPROACH Clinical study protocol- Final version V1.0\_NL*

---

27. When seeking informed consent for participation in a research study the physician must be particularly cautious if the potential subject is in a dependent relationship with the physician or may consent under duress. In such situations the informed consent must be sought by an appropriately qualified individual who is completely independent of this relationship.
28. For a potential research subject who is incapable of giving informed consent, the physician must seek informed consent from the legally authorised representative. These individuals must not be included in a research study that has no likelihood of benefit for them unless it is intended to promote the health of the group represented by the potential subject, the research cannot instead be performed with persons capable of providing informed consent, and the research entails only minimal risk and minimal burden.
29. When a potential research subject who is deemed incapable of giving informed consent is able to give assent to decisions about participation in research, the physician must seek that assent in addition to the consent of the legally authorised representative. The potential subject's dissent should be respected.
30. Research involving subjects who are physically or mentally incapable of giving consent, for example, unconscious patients, may be done only if the physical or mental condition that prevents giving informed consent is a necessary characteristic of the research group. In such circumstances the physician must seek informed consent from the legally authorised representative. If no such representative is available and if the research cannot be delayed, the study may proceed without informed consent provided that the specific reasons for involving subjects with a condition that renders them unable to give informed consent have been stated in the research protocol and the study has been approved by a research ethics committee. Consent to remain in the research must be obtained as soon as possible from the subject or a legally authorised representative.
31. The physician must fully inform the patient which aspects of their care are related to the research. The refusal of a patient to participate in a study or the patient's decision to withdraw from the study must never adversely affect the patient-physician relationship.
32. For medical research using identifiable human material or data, such as research on material or data contained in biobanks or similar repositories, physicians must seek informed consent for its collection, storage and/or reuse. There may be exceptional situations where consent would be impossible or impracticable to obtain for such research. In such situations the research may be done only after consideration and approval of a research ethics committee.

**Use of Placebo**

33. The benefits, risks, burdens and effectiveness of a new intervention must be tested against those of the best proven intervention(s), except in the following circumstances:

Where no proven intervention exists, the use of placebo, or no intervention, is acceptable; or

---

*APPROACH Clinical study protocol- Final version V1.0\_NL*

---

Where for compelling and scientifically sound methodological reasons the use of any intervention less effective than the best proven one, the use of placebo, or no intervention is necessary to determine the OA progression or safety of an intervention

and the patients who receive any intervention less effective than the best proven one, placebo, or no intervention will not be subject to additional risks of serious or irreversible harm as a result of not receiving the best proven intervention.

Extreme care must be taken to avoid abuse of this option.

### **Post-Trial Provisions**

34. In advance of a clinical trial, sponsors, researchers and host country governments should make provisions for post-trial access for all participants who still need an intervention identified as beneficial in the trial. This information must also be disclosed to participants during the informed consent process.

### **Research Registration and Publication and Dissemination of Results**

35. Every research study involving human subjects must be registered in a publicly accessible database before recruitment of the first subject.
36. Researchers, authors, sponsors, editors and publishers all have ethical obligations with regard to the publication and dissemination of the results of research. Researchers have a duty to make publicly available the results of their research on human subjects and are accountable for the completeness and accuracy of their reports. All parties should adhere to accepted guidelines for ethical reporting. Negative and inconclusive as well as positive results must be published or otherwise made publicly available. Sources of funding, institutional affiliations and conflicts of interest must be declared in the publication. Reports of research not in accordance with the principles of this Declaration should not be accepted for publication.

### **Unproven Intervention in Clinical Practice**

In the treatment of an individual patient, where proven interventions do not exist or other known interventions have been ineffective, the physician, after seeking expert advice, with informed consent from the patient or a legally authorised representative, may use an unproven intervention if in the physician's judgment it offers hope of saving life, re-establishing health or alleviating suffering. This intervention should subsequently be made the object of research, designed to evaluate its safety and OA progression. In all cases, new information must be recorded and, where appropriate, made publicly available.

## **Appendix 2: Administrative structure of the study and responsibilities of the investigators**

### **Organisation of the study**

Sponsor: UMC Utrecht

Participating centers and principal investigators:

- |                                                  |                          |
|--------------------------------------------------|--------------------------|
| - UMC Utrecht, Netherlands;                      | dr. W.E. van Spil        |
| - Leiden University Medical Center, Netherlands; | Prof. dr. G. Kloppenburg |
| - SERGAS, la Coruna, Spain;                      | dr. F. Blanco            |
| - APHP, Paris, France;                           | Prof. dr. F. Berenbaum   |
| - Diakonhjemmet Hospital AS, Oslo, Norway;       | dr. I. Haugen            |

### **Organisation of the participating centre**

Every person to whom the investigator delegates under his/her responsibility a part of the follow-up of the study (co-investigator, nurse...) and any other person involved in the study for this centre (cardiologist, pharmacist,...) must figure in the "Delegation log".

This document should be filled in at the beginning of the study and updated at any change of a person involved in the study in the centre.

The CVs of all members of the team involved in the study (if possible in English) will be collected during the course of the study (at least, members involved in the participants' medical follow-up/study-related decision process and persons involved in the measurement of main assessment criteria).

### **Documentation of the participating center supplied to the sponsor**

The investigator undertakes before the study begins:

- to provide his/her dated and signed English Curriculum Vitae (CV) (maximum 2 pages) or to complete in English the CV form provided by the sponsor and to send it to the sponsor, together with that of his/her co-investigator(s),
- to provide any other document required by local regulation, and to translate the patient information and consent form and SOPs if needed.
- to send (if appropriate), a copy of the IRB/IEC's opinion with details of its composition and the qualifications of its constituent members.

### Appendix 3: Standard Operating Procedures

1. Acquisition radiography
  - 1.1 Knee semi-flexed Posterior Anterior (PA) View
  - 1.2 Hand PA view
2. Acquisition Magnetic Resonance Imaging (MRI)
  - 2.1 quantitative and semi-quantitative MRI of index knee
  - 2.2 T2 MRI of index knee
3. Acquisition computed tomography (CT)
  - 3.1 Quantitative CT of index knee and whole Body Low Dose CT
4. Reading radiographs
  - 4.1 Knee semi-flexed PA view: K&L grade, Altman score, KIDA
  - 4.2 Hand PA view: K&L grade, Altman score, Verbruggen score.
  - 4.3 2D shape analysis of index knee
  - 4.4 subchondral bone trabecular structure of index knee
5. Reading MRI
  - 5.1 semi-quantitative MRI; MOAKS
  - 5.2 quantitative MRI; cartilage volume, thickness,
  - 5.3 T2 MRI
  
  - 5.5 3 D shape analysis on knee MRI
6. Reading CT
  - 6.1 subchondral bone on knee quantitative CT
  - 6.2 3D shape analysis on knee quantitative CT
  - 6.3 Disc degeneration, OA of Facet joints, hips, Acromioclavicular joints, and glenohumeral joints on whole body low dose CT
7. XNAT/ TranSMART platform
8. HandScan measurements
9. Functional tests
  - 9.1 Motion analysis
  - 9.2 Performance based test
10. Biomarkers
  - 10.1 collection of biosamples: blood and urine
  - 10.2 processing of biosamples: blood and urine
  - 10.3 storage, tracking and distribution of samples at clinical centres
  - 10.4 logging and storage of Approach samples at testing sites
11. Physical examination

Presented in the separated document, Approach Standard Operating procedures

# **SOP 1.1: Acquisition Knee radiography; knee semi-flexed Posterior Anterior view**

V1.0 d.d. 29-01-2016

## **Aim**

To determine the severity of osteoarthritis of the knee, based on joint space narrowing, subchondral sclerosis and osteophytes. This image acquisition will also be used for determination of subchondral bone texture parameters.

## **Duration of the procedure for the patient**

Acquisition of PA radiographs of both knees will take 10-15 minutes.

## **Preparation and prerequisites**

Please follow standard radiation protection practices. Appropriate collimation of the x-ray beam should minimize radiation dose to the patient. Please adhere to institutional policies and procedures for shielding.

- Digital image header should include the patient study identifier not the patient's name or date of birth.
- Explain the examination procedure to the patient
- Do not use any filters
- Place the positioning aid in front of the bucky (see figure below).
- Place the bone density standard against the bucky next to the knee joint (see figure below).

## **Acquisition**

### *Positioning the patient*

Position the patient in a standing upright position, on the positioning aid facing the bucky.

Both feet are fixed in external rotation by pressing the inner aspects of the foot and heel against the V-shaped support on the base of the positioning aid.

Center the knee on the image and center the beam on the knee. Be sure that the bone density standard is visible on the image.

The great toes of both feet are placed over the positioning aid, MTP joint right below the detector

Both knees are flexed until they touch the bucky. This fixes the angulation of the tibias. Both thighs are also pressed directly against the bucky to fix the angulation of the femurs.

Gently guide the patient forward with your hand in the small of the back to ensure firm contact of both thighs with the bucky.

Body weight is distributed equally between the two legs

*APPROACH Clinical study protocol- Final version V1.0\_NL***Positioning the X-ray beam**

- X-ray beam is horizontal, parallel with the floor, perpendicular to the joint (halfway distance between lower side of the patella and the upper side of the tibia (tuberositas tibiae))
- Collimate to the size of the image. Make sure the bone density standard is included in the image.
- Place a R or L marker close to the knee, but where it will not obscure the knee anatomy.
- Expose each knee separately.

**Figure patient and beam positioning**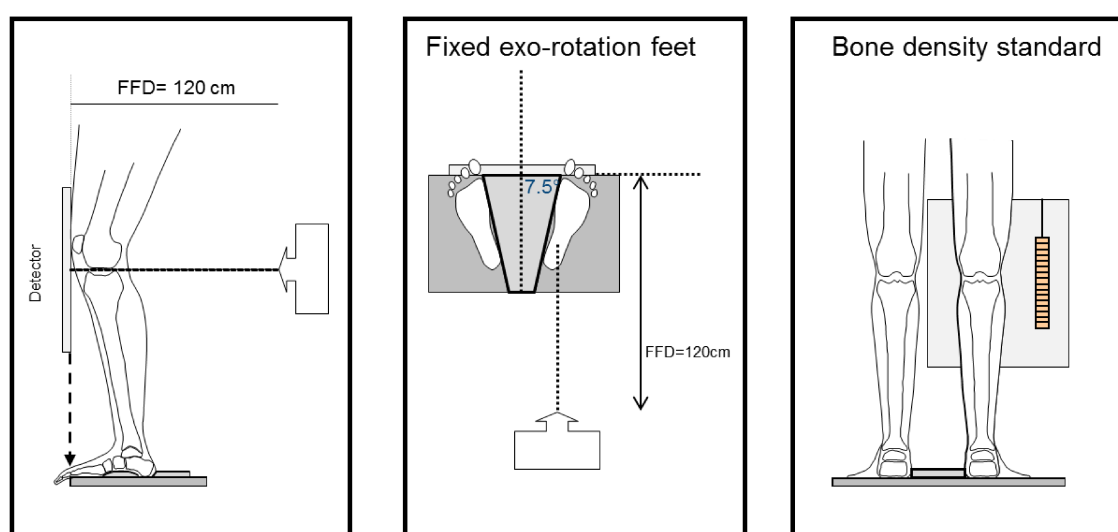**Exposure Technique:**

|                         |                               |             |
|-------------------------|-------------------------------|-------------|
| Imaging System          | Bucky                         | recommended |
| Focus-Detector Distance | 120 cm                        | required    |
| mAs                     | Dependent on screen system    |             |
| kVp Range               | 55 kVp                        | recommended |
| Focal Spot              | Small                         | required    |
| Raster/ grid            | NO                            |             |
| Filter                  | NO                            |             |
| Beam angle              | Horizontal, parallel to floor | required    |
| Other                   | Use right/ left marker        | required    |



---

*APPROACH Clinical study protocol- Final version V1.0\_NL***Example of radiograph**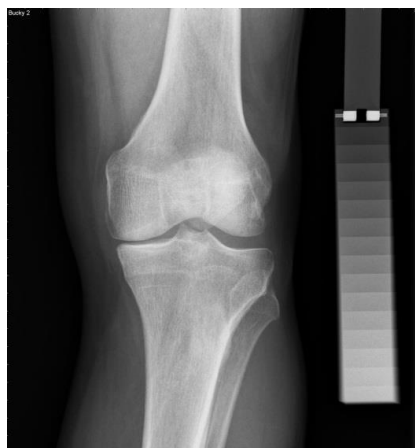**Criteria of good quality knee radiographs**

- Each knee is exposed separately.
- Complete coverage of the knee anatomy, this includes the femoral and tibial metaphyses as well as the proximal fibula.
- Optimum exposure to visualize the medial and lateral sides of the knee joint, including bone margins, and soft tissue should be clearly visible without the use of a high intensity light.
- The joint space must be open.
- Medial tibial plateau should be flat (horizontal).
- The knee must appear on the middle of the image.
- The bone density standard has to be completely visible on the image.
- The applicable left/right marker must be on the image.
- The image should not be underexposed or overexposed

## **SOP 1.2: acquisition Hand radiography; Posterior Anterior view**

V1.0 d.d. 29-01-2016

### **Aim**

To determine severity of hand osteoarthritis as confounding factor for knee osteoarthritis parameters in the APPROACH cohort.

### **Duration of the procedure for the patient**

Acquisition of hand radiographs will take 5 minutes.

### **Preparation and prerequisites**

Please follow standard radiation protection practices. Appropriate collimation of the x-ray beam and use of a lead apron to shield the gonads should minimize radiation dose to the patient. Please adhere to institutional policies and procedures for shielding.

- Digital image header should include the patient study identifier not the patient's name or date of birth.
- Explain the examination procedure to the patient
- Do not use any filters

### **Acquisition**

#### *Positioning the patient*

- Remove jewelry where possible
- Patient must be seated in front of the imaging table with the entire fore-arm including elbows resting on the X-ray table, with the palm of the hand and wrist relaxed on the detector.
- Fingers extended and slightly separated. Fingers should not be strained far apart.
- Hand and wrist flat and relaxed on the detector (and cassette/receptor) to avoid joint magnification.
- Align 2nd metacarpal in a straight line with the radius (180 degrees).

#### *Positioning the X-ray beam*

- Beam centering and angulation: centered in the middle of both hands, perpendicular to the plane of the receptor (bucky; Fig. 1).
- Collimate to the size of the image, wrist included.
- Focus detector distance of 100 cm
- Place a R or L marker close to the hand, but where it will not obscure the hand anatomy.
- Expose both hands together.

---

*APPROACH Clinical study protocol- Final version V1.0\_NL*

---

**Exposure Technique:**

|                         |                        |             |
|-------------------------|------------------------|-------------|
| Imaging System          | Bucky/ table           | recommended |
| Focus-detector Distance | 100 cm                 | required    |
| Focal Spot              | Small                  | required    |
| mAs                     | 2,5 mAs                | required    |
| kVp Range               | 46kV                   | required    |
| Other                   | Use right/ left marker | required    |

**Figure Hand positioning**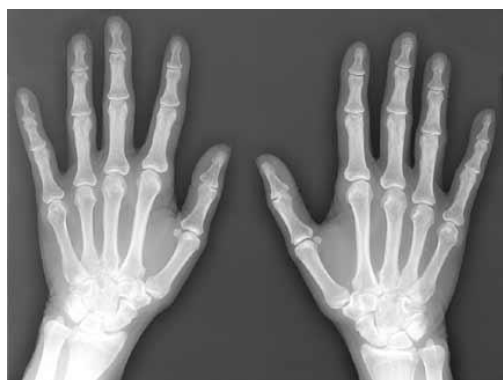***Criteria of good quality of hand radiographs***

- Complete coverage of the hand anatomy, this includes the wrist.
- The joint space of PIP and DIP joints must be open.
- The applicable left/right marker must be on the image.
- The image should not be underexposed or overexposed.

---

*APPROACH Clinical study protocol- Final version V1.0\_NL*

## **SOP 2.1: acquisition knee quantitative and semi-quantitative MRI**

# **MRI ACQUISITION GUIDELINES**

**Proprietary Statement: The MRI Acquisition Guideline is a Proprietary document provided by BICL in support of the IMI project. All material contained herein is confidential and proprietary to BICL. Do not distribute or duplicate.**

Version 1.0

June 29, 2015  
Proprietary and Confidential to BICL

Page 1 of 18

*APPROACH Clinical study protocol- Final version V1.0\_NL*

**Table of Contents**

|                                           |           |
|-------------------------------------------|-----------|
| <b>INTRODUCTION</b> .....                 | <b>5</b>  |
| <b>SCHEDULE OF STUDY PROCEDURES</b> ..... | <b>6</b>  |
| <b>MRI ACQUISITION GUIDELINES</b> .....   | <b>7</b>  |
| <b>SIGNATURE APPROVAL PAGE</b> .....      | <b>19</b> |
| <b>REVISION HISTORY</b> .....             | <b>19</b> |

Version 1.0

June 29, 2015  
Proprietary and Confidential to BICL

Page 2 of 16

---

*APPROACH Clinical study protocol- Final version V1.0\_NL*

---

## **Introduction**

Boston Imaging Core Lab, LLC has developed the following acquisition guidelines for standardization of the study MRI components across radiology centers participating in this clinical research trial.

All MRI for this study should be acquired in strict adherence to the study protocol and guidelines provided. If there are any deviations from these parameters please provide explanatory comments on the Image Transmittal Form (forms supplied by BICL).

- Please ensure the blinding of all confidential patient/site information on all images.
- Images sent to BICL shall be clear of any markings, writings or annotations.
- All imaging data will be archived at BICL as required by regulatory agencies.

### **SUBMISSION OF IMAGES**

#### **Digital Image Transfer**

- All MRI must be in uncompressed DICOM format
- Images should remain digitally archived at the site until BICL has provided image quality feedback.
- Submitted MRI should be devoid of any marks or annotations.
- All confidential patient information must be blinded.

For inquiries regarding these guidelines, please contact:

[frank.roemer@bicl.org](mailto:frank.roemer@bicl.org) or [ali.guermazi@bicl.org](mailto:ali.guermazi@bicl.org)

THANK YOU FOR YOUR PARTICIPATION AND COOPERATION IN THIS CLINICAL STUDY.

### **GENERAL RECOMMENDATIONS**

1. The sites should confirm upfront that NO change in the hardware (scanner, coil, etc.) or software will be necessary during the course of the study.
2. The site should be trained and monitor an adequate MR imaging acquisition protocol (including MRI sequences dedicated to cartilage morphometry).
3. The central readers should receive 2-5 volunteer scans from each site and approve the acquisition protocol dedicated to cartilage morphometry BEFORE the site starts to recruit participants for the trial.
4. The site must make sure that the baseline scans adhere to the specified acquisition protocol as well as that full anatomical coverage, appropriate orientation, and lack of artefacts is provided.
5. Once the baseline scans are acquired, the site must make sure that neither the scanner, nor the coil, nor the acquisition parameters (TR, TE, FA, spatial resolution) are ever changed between baseline and follow-up, and that all acquisitions provide full anatomical coverage, appropriate orientation, and lack of artefacts during the study.

## APPROACH Clinical study protocol- Final version V1.0\_NL

**MRI Acquisition Guidelines****PATIENT CONDITIONS**

6. Insure there is no contraindication to perform the knee MRI.
7. The patient should be relaxed and should not have performed athletic exercise (i.e. jogging) during the past 3 hours.
8. Ask patient to empty bladder prior to exam, to avoid motion artifacts during image acquisition.
9. Inform the patient that it is critical that she/he does not move the knee at all during image acquisition.

|                                                     |                                                                                                                                                                                                                                                                                                                                                                                                                                                                                                                                                                                                                                                                                                                                                                                                                                               |
|-----------------------------------------------------|-----------------------------------------------------------------------------------------------------------------------------------------------------------------------------------------------------------------------------------------------------------------------------------------------------------------------------------------------------------------------------------------------------------------------------------------------------------------------------------------------------------------------------------------------------------------------------------------------------------------------------------------------------------------------------------------------------------------------------------------------------------------------------------------------------------------------------------------------|
| Scanner type                                        | 1.5 – 3.0 Tesla                                                                                                                                                                                                                                                                                                                                                                                                                                                                                                                                                                                                                                                                                                                                                                                                                               |
| Patient orientation                                 | Supine                                                                                                                                                                                                                                                                                                                                                                                                                                                                                                                                                                                                                                                                                                                                                                                                                                        |
| Scout view                                          | Axial, sagittal and coronal scout to orient double oblique coronal images                                                                                                                                                                                                                                                                                                                                                                                                                                                                                                                                                                                                                                                                                                                                                                     |
| Slice orientation of double oblique coronal images  | Axial scout: Orient double oblique coronal acquisition so that the posterior ends of the femoral condyles are WITHIN ONE (coronal) plane<br>Sagittal scout: Orient double oblique coronal acquisition so that the images are acquired parallel to the long axis of femoral shaft                                                                                                                                                                                                                                                                                                                                                                                                                                                                                                                                                              |
| Slice orientation of double oblique sagittal images | Axial scout: Orient sagittal acquisitions perpendicular to the double oblique coronal acquisition<br>Coronal scout: Orient sagittal acquisition perpendicular to the tibial plateaus                                                                                                                                                                                                                                                                                                                                                                                                                                                                                                                                                                                                                                                          |
| Slice orientation of axial images                   | Sagittal scout: orient axial parallel to the tibial plateaus and scan the region 2 cm below the tibial plateaus to superior tip of the patella                                                                                                                                                                                                                                                                                                                                                                                                                                                                                                                                                                                                                                                                                                |
| Coil                                                | Knee coil                                                                                                                                                                                                                                                                                                                                                                                                                                                                                                                                                                                                                                                                                                                                                                                                                                     |
| Knee positioning                                    | <ul style="list-style-type: none"> <li>- rotate leg for examination, so that the toes and patella face upward. Avoid strong external rotation of the leg (this may be different from standard clinical exam) and make sure the patient is comfortable.</li> <li>- to obtain some degree of flexion of the knee, place back, buttocks and heel of patient directly on the scanner table pads, without elevating them above this level. (see Figure below)</li> <li>- elevate knee by putting cushions below it so that that the center of the knee is placed in the center of the coil. Avoid scanning the knee in a fully extended or even hyperextended position, as this affects the region of interest at the femur in coronal acquisitions.</li> <li>- tightly and comfortably pad within the coil on ALL sides using cushions</li> </ul> |
| Scan time                                           | - < 45 min per knee                                                                                                                                                                                                                                                                                                                                                                                                                                                                                                                                                                                                                                                                                                                                                                                                                           |

Please do not use cushions under the heel, this will extend the knee. For some knee flexion, you may use small cushions under the knee. Also use gentle tape if involuntary movement of the patient.

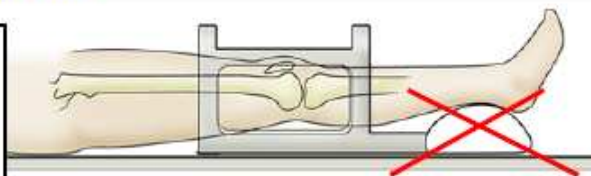

## APPROACH Clinical study protocol- Final version V1.0\_NL

The table below shows **strongly preferred** parameters. Please use parameters as close to these as possible. Once these values have been selected, they should remain consistent throughout this study for all patients recruited and images in the same clinical site.

| Type of MR sequence                                                          | Anatomical Orientation  | Slice thickness | Acquisition Image matrix | Approximate Image time (min) |
|------------------------------------------------------------------------------|-------------------------|-----------------|--------------------------|------------------------------|
| <b>Target knee:</b>                                                          |                         |                 |                          |                              |
| MP Localizer                                                                 | 3 plane                 | 5 mm            | 256                      | 1 min                        |
| 1. PD/IW TSE or FSE FS (for BICL SQ analyses)                                | Double oblique sagittal | 3.0 mm          | 256 x 256                | 5 min                        |
| 2. PD/IW TSE or FSE FS (for BICL SQ analyses)                                | Axial                   | 3.0 mm          | 256 x 256                | 3.5 min                      |
| 3. PD/IW TSE or FSE FS (for BICL SQ analyses)                                | Double oblique coronal  | 3.0 mm          | 256 x 256                | 3 min                        |
| 4. T1W SE (for BICL SQ analyses)                                             | Coronal                 | 3.0 mm          | 256 x 256                | 4 min                        |
| 5. T1W 3D SPGR/FLASH/FFE WE or FS (for Chondrometrics morphometric analyses) | Double oblique sagittal | 1.5 mm          | 512 x 512                | 10-15 min                    |

PD = Proton Density, IW = Intermediate Weighted, TSE = Turbo Spin Echo, FSE = Fast Spin Echo, SE = Spin Echo, FS = Fat suppressed/saturated, WE = Water Excited, SPGR = Spoiled Gradient echo, FLASH = Fast Low Angle SHot, FFE = Fast Field Echo



---

*APPROACH Clinical study protocol- Final version V1.0\_NL*

---

**ADDITIONAL MRI PARAMETER DETAILS FOR SIEMENS:****2D IW TSE:** (apply to axial, coronal and sagittal intermediate-weighted (IW) MR sequences)

- 3600-5000/30-40 (TR msec/TE msec)
- 14-18 cm field of view (FOV), please keep the FOV as close as possible to 14 cm
- Echo train=8
- 1-2 excitation (NEX)
- Slice thickness=3 mm
- Spacing=no gap (0.3 mm gap)
- No phase wrap (NP)
- Frequency-selective fat suppression

**2D T1 SE:** (apply to coronal MR sequence)

- 360-500/12-15 (TR msec/TE msec)
- 14-18 cm field of view (FOV), please keep the FOV as close as possible to 14 cm
- 1-2 excitation (NEX)
- Slice thickness=3 mm
- Spacing=no gap (or 0.3 mm interslice gap)
- No phase wrap (NP)
- No fat suppression

**3D T1 FLASH:** (apply to sagittal MR sequence)

- 17/7 (TR msec/TE msec)
- Flip angle=around 12° at 3T and 15° at 1.5T
- 14-18 cm field of view (FOV), please keep the FOV as close as possible to 14 cm
- 1 excitation (NEX)
- In-plane resolution=0.3125 mm x 0.3125 mm
- Slice thickness=1.5 mm
- Spacing=no gap, no overlap
- No phase wrap (NP)
- Frequency-selective fat suppression or water excitation

Make sure the total scanning time (Localizer – last MRI sequence) is kept within 40 min per knee.

---

*APPROACH Clinical study protocol- Final version V1.0\_NL*

---

**ADDITIONAL MRI PARAMETER DETAILS FOR GENERAL ELECTRIC:****2D IW FSE:** (apply to axial, coronal and sagittal intermediate-weighted (IW) MR sequences)

- 3600-5000/30-40 (TR msec/TE msec)
- 14-18 cm field of view (FOV), please keep the FOV as close as possible to 14 cm
- Echo train=8
- 1-2 excitation (NEX)
- Slice thickness=3 mm
- Spacing=no gap (0.3 mm gap)
- No phase wrap (NP)
- frequency-selective fat suppression

**2D T1 SE:** (apply to coronal MR sequence)

- 360-500/12-15 (TR msec/TE msec)
- 14-18 cm field of view (FOV), please keep the FOV as close as possible to 14 cm
- 1-2 excitation (NEX)
- Slice thickness=3 mm
- Spacing=no gap (or 0.3 mm interslice gap)
- No phase wrap (NP)
- No fat suppression

**3D T1 SPGR:** (apply to sagittal MR sequence)

- 17/7 (TR msec/TE msec)
- Flip angle=around 12° at 3T and 15° at 1.5T
- 14-18 cm field of view (FOV), please keep the FOV as close as possible to 14 cm
- 1 excitation (NEX)
- In-plane resolution=0.3125 mm x 0.3125 mm
- Slice thickness=1.5 mm
- Spacing=no gap, no overlap
- No phase wrap (NP)
- Frequency-selective fat suppression or water excitation

Make sure the total scanning time (Localizer – last MRI sequence) is kept within 40 min per knee.

---

*APPROACH Clinical study protocol- Final version V1.0\_NL*

---

**ADDITIONAL MRI PARAMETER DETAILS FOR PHILIPS:****2D IW TSE:** (apply to axial, coronal and sagittal intermediate-weighted (IW) MR sequences)

- 3600-5000/30-40 (TR msec/TE msec)
- 14-18 cm field of view (FOV), please keep the FOV as close as possible to 14 cm
- Echo train=8
- 1-2 excitation (NEX)
- Slice thickness=3 mm
- Spacing=no gap (0.3 mm gap)
- No phase wrap (NP)
- frequency-selective fat suppression

**2D T1 SE:** (apply to coronal MR sequence)

- 360-500/12-15 (TR msec/TE msec)
- 14-18 cm field of view (FOV), please keep the FOV as close as possible to 14 cm
- 1-2 excitation (NEX)
- Slice thickness=3 mm
- Spacing=no gap (or 0.3 mm interslice gap)
- No phase wrap (NP)
- No fat suppression

**3D T1 FFE:** (apply to sagittal MR sequence)

- 17/7 (TR msec/TE msec)
- Flip angle=around 12° at 3T and 15° at 1.5T
- 14-18 cm field of view (FOV), please keep the FOV as close as possible to 14 cm
- 1 excitation (NEX)
- In-plane resolution=0.3125 mm x 0.3125 mm
- Slice thickness=1.5 mm
- Spacing=no gap, no overlap
- No phase wrap (NP)
- Frequency-selective fat suppression or water excitation

Make sure the total scanning time (Localizer – last MRI sequence) is kept within 40 min per knee.

*APPROACH Clinical study protocol- Final version V1.0\_NL***SCOUT VIEW AND SLICE ORIENTATION (double oblique coronals):**

The double oblique coronal images should be aligned with the posterior ends of the femoral condyles as shown below making use of the axial localizer image.

Please make sure the axial scout view shows the most posterior aspect of the femoral condyles.

Also, the double oblique coronal images should extend beyond the posterior end of the femoral condyles posteriorly, to ensure full anatomical coverage.

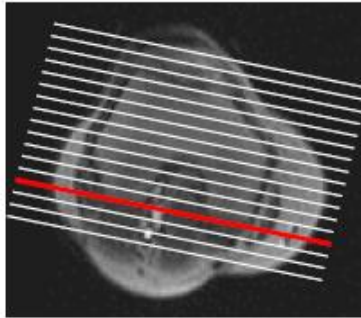

The double oblique coronal images should be aligned parallel to the shaft (diaphysis) of the femur, making use of the sagittal localizer image.

Please make sure the sagittal scout view shows a relevant aspect of the femoral shaft.

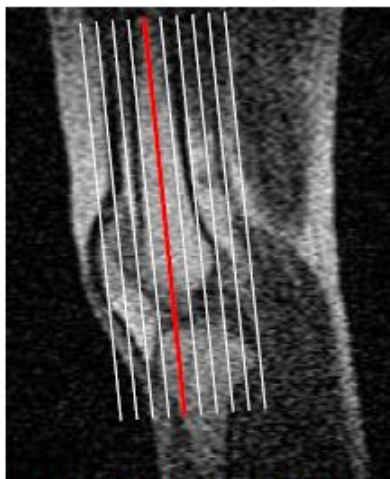

Also, the double oblique coronal images should extend beyond the anterior and posterior rims of the medial and lateral tibia, respectively, and beyond the posterior end of both femoral condyles.

*APPROACH Clinical study protocol- Final version V1.0\_NL***EXAMPLE OF WELL ALIGNED DOUBLE OBLIQUE CORONAL ACQUISITION:**

The posterior ends of the medial and lateral femoral condyle are in the same slice and should have approximately the same size in the double oblique coronal images.

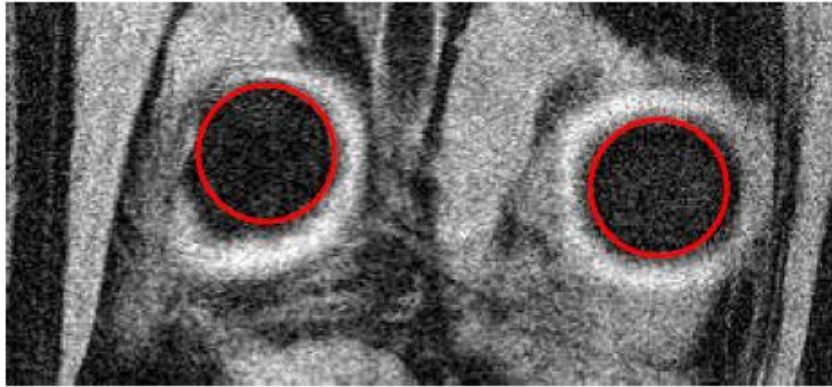

*Please note that:*

- a deviation by 1 slice is acceptable;
- a deviation by 2 slices is borderline;
- a deviation of > 2 slices the scan should be repeated

**EXAMPLE OF WRONGLY ACQUIRED (MALROTATED) DOUBLE OBLIQUE CORONAL ACQUISITIONS:**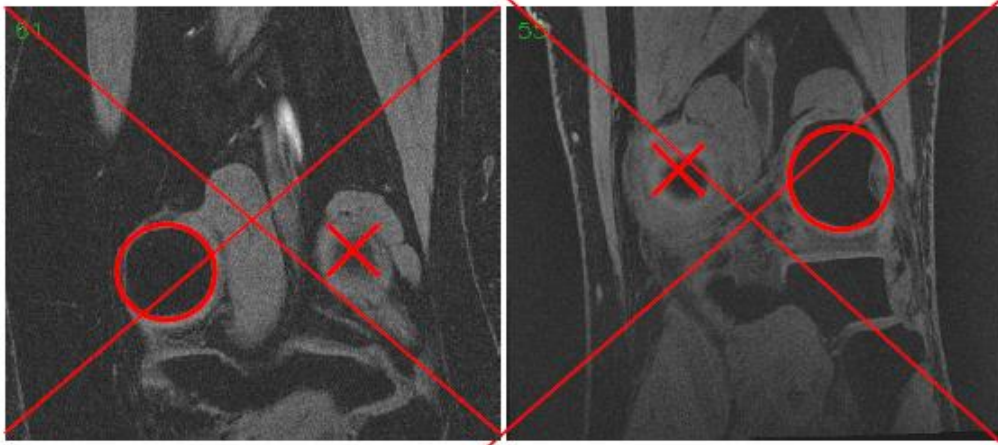

Version 1.0

June 29, 2015  
Proprietary and Confidential to BICL

Page 10 of 18

---

*APPROACH Clinical study protocol- Final version V1.0\_NL*

---

**SCOUT VIEW AND SLICE ORIENTATION (double oblique sagittals):**

The double oblique sagittal images (red in Figure below) should be aligned perpendicular to the double oblique coronal images, using axial localizer image.

Please make sure the axial scout view shows the most posterior aspect of the femoral condyles.

Also, the double oblique sagittal images should extend beyond the internal and external edges of the femoral condyles to ensure full anatomical coverage.

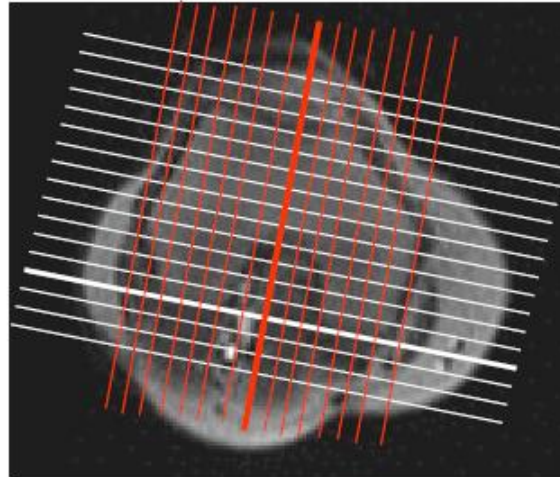

## APPROACH Clinical study protocol- Final version V1.0\_NL

**EXAMPLE OF CORRECTLY AND WRONGLY ACQUIRED SAGITTAL ACQUISITIONS:**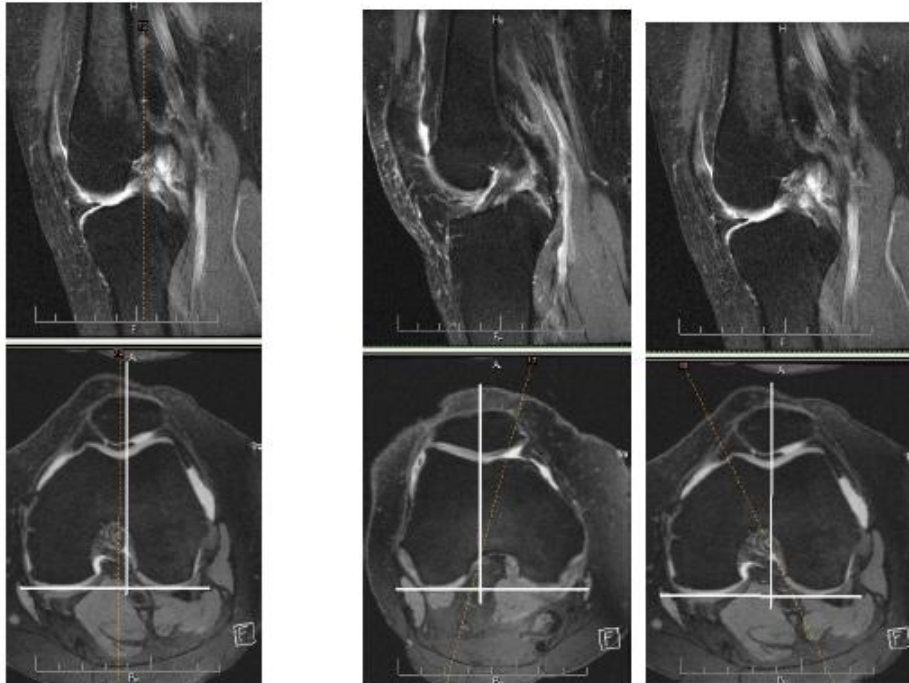

This is a perfect example of a well-executed sagittal MRI sequence. The sagittal acquisition is perpendicular to the posterior ends of the femoral condyles.

These are 2 bad examples of sagittal MRI sequences. The sagittal acquisition is not perpendicular to the posterior ends of the femoral condyles. As a result, the anterior aspect of the medial femoral condyle and posterior aspect of lateral femoral condyle are represented in one same image.

*APPROACH Clinical study protocol- Final version V1.0\_NL***EXAMPLE OF OTHER ARTIFACTS:**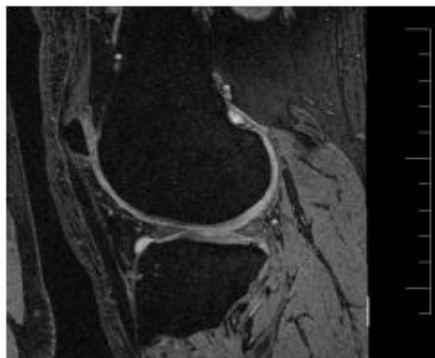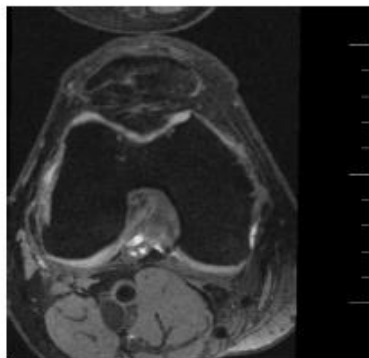

These are examples of fold-over artifact in SPGR sagittal and axial planes

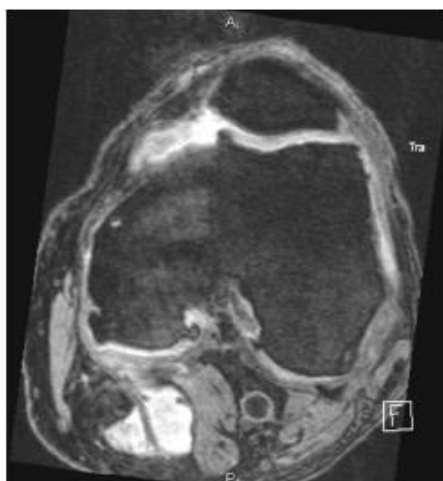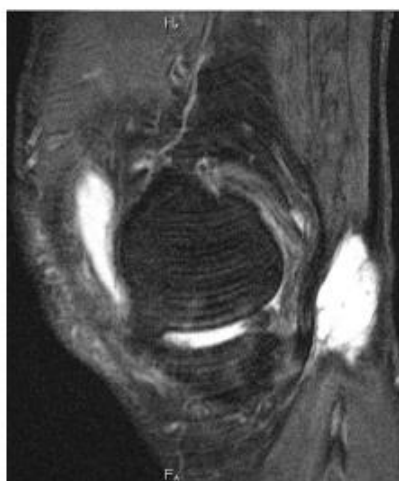

These are examples of motion artifact in intermediate-weighted axial and sagittal planes.



*APPROACH Clinical study protocol- Final version V1.0\_NL*

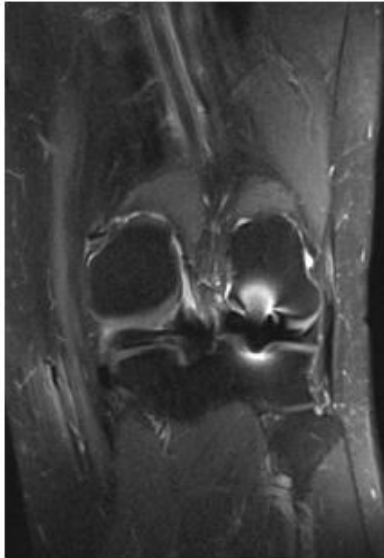

This is an example of metallic artifact on coronal intermediated-weighted coronal MRI

Version 1.0

June 29, 2015  
Proprietary and Confidential to BICL

Page 14 of 18

---

*APPROACH Clinical study protocol- Final version V1.0\_NL*

---

**Quality Control of image data after acquisition**

1. Please ALWAYS check the data quality before sending the data. The central readers will perform a rigorous quality check on their end when data comes in.
2. Check that the orientation of the scans is satisfactory
3. Check that anatomical coverage is complete (first and last image MUST be OUTSIDE the bone and cartilage plate)
4. Check that fat suppression is satisfactory (bone must be dark, bone cartilage interface should be clearly visible without a low signal band appearing below the bone interface)
5. Check that no motion artifacts are present (structures will be blurry or appear at two different locations in the image)
6. Check that no aliasing artifact is present. If aliasing occurs, parts of the anatomical structures will appear at the wrong locations (the very lateral ones on the medial side, or anterior ones in the posterior slices). This problem can be avoided by increasing phase- or slice oversampling. If this occurs, please contact us or the local radiologist to discuss the issue.
7. Check that no "stripes" are present in the images. If this occurs please check with the local radiology facility whether the scanner needs to be serviced.
8. After optimal protocol imaging is obtained, all parameters should remain constant for subsequent patients recruited in the same clinical site.

**Storage of image data**

1. Please always keep a copy of the original DICOM data at your site.
2. Anonymize all data in a way that no "real" patient name appears in the DICOM header. Images should not have any markings, annotations or confidential patient information.
3. Imaging data (including raw/original data if possible) should remain digitally archived at the site.

---

*APPROACH Clinical study protocol- Final version V1.0\_NL*

---

## Copyright Page

Copyright© 2011 BICL, LLC. All rights reserved.

The material presented in this document and contained herein is proprietary and confidential to Boston Imaging Core Lab, LLC and is intended for BICL and its client use only. The material is to be used for the purpose for which it was delivered or made available to you subject to the terms and conditions (if any) of applicable licenses. Each User shall maintain the confidentiality of the material and shall not disclose, distribute, reproduce, or otherwise disseminate, in whole or part, any part of this document or the information contained herein to any third party, without the prior written permission of BICL. Any unauthorized use or disclosure of this document or the information contained herein, including any resale, reproduction, or any attempt to do so, is strictly prohibited.

Version 1.0

November 6, 2013  
Proprietary and Confidential to BICL

Page 16 of 16

## SOP 2.2: acquisition knee T2 MRI

The **Sagittal T2 mapping sequence** is a small FOV exam intended to cover both the patellar and femoral / tibial cartilage only. Using this acquisition, the cartilage morphology and condition, the anterior and posterior meniscal horns, the cruciate ligaments, anterior / posterior femoral and tibial osteophytes, superior / inferior patellar osteophytes, as well as subchondral bone cysts and attrition may be assessed.

This Sagittal scan is a single oblique acquisition, oriented such that the sagittal slices are perpendicular to a line tangential to the posterior surfaces of the femoral condyles. The easiest manner to create this scan prescription is to copy the center of the slice locations from the 3D DESS image and move (translate) the imaging FOV to minimize the impact of any phase wrap. Check in both the Sagittal and Coronal localizer planes!

If this exam needs to be repeated, the scan prescription instructions follow. First, find the axial localizer slice with the largest cross-section through the condyles and the mid-joint sagittal and coronal localizer. The correct oblique angle is identified by first rotating and translating the imaging FOV such it is aligned with and touches both of the posterior condylar surfaces (appears to be an oblique coronal acquisition). Then, without changing the angulation, perform a right mouse click and select make slices orthogonal (now appears to be sagittal oblique acquisition). Finally, center the imaging FOV (translate only!!) over the knee in the axial plane. Now check the imaging FOV such that it is centered in the coronal and sagittal planes, and adjust if necessary.

With large knees, phase aliasing artifact will probably occur with this 120mm FOV acquisition. Adjust the imaging locations such that only regions of subcutaneous fat overlap.

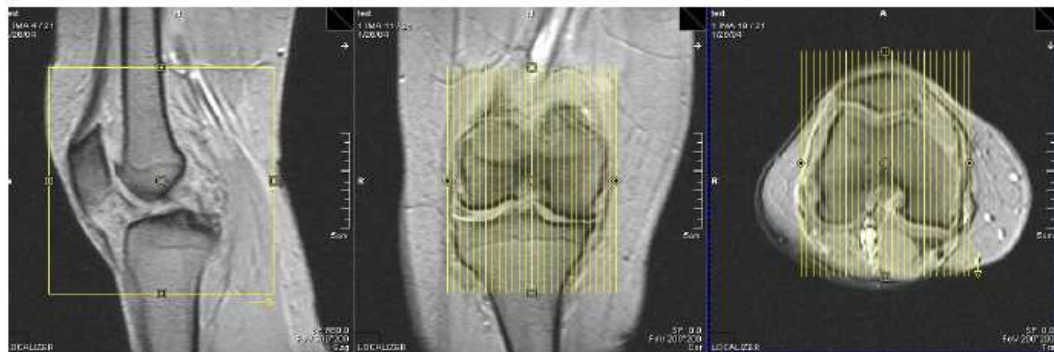

Scan prescription for Sagittal T2 map

*APPROACH Clinical study protocol- Final version V1.0\_NL*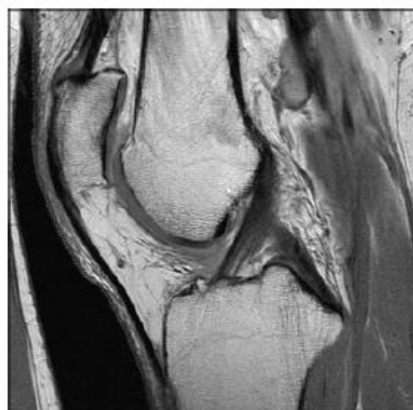

Acquisition on a small knee

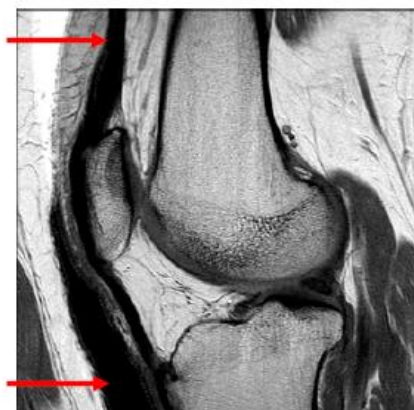

Allowed phase wrap for this acquisition would occur only in the subcutaneous fat regions as shown by the red arrows

**Final OAI knee MRI protocol acquisition parameters (Peterfy, Osteoarthritis and Cartilage, 2008)**

| Scan                            | SAG 2D<br>MESE            |
|---------------------------------|---------------------------|
| Plane                           | Sagittal                  |
| FS                              | No                        |
| Matrix (phase)                  | 269                       |
| Matrix (frequency)              | 384                       |
| No. of slices                   | 21                        |
| FOV (mm)                        | 120                       |
| Slice thickness/gap (mm/mm)     | 3/0.5                     |
| Flip angle (°)                  | n/a                       |
| TE/TR (ms/ms)                   | 10,20,30,40,50,60,70/2700 |
| Bandwidth (Hz/pixel)            | 250                       |
| Chemical shift (pixels)         | 1.8                       |
| No. excitations averaged        | 1                         |
| ETL                             | 1                         |
| Phase encode axis               | A/P                       |
| Distance factor (%)             | 16                        |
| Phase oversampling              | 0                         |
| Slice oversampling              | 0                         |
| Phase resolution                | 70                        |
| Phase partial Fourier (8/8=1)   | 0.875                     |
| Readout partial Fourier (8/8=1) | 1                         |
| Slice partial Fourier (8/8=1)   | 0.75                      |
| X-resolution (mm)               | 0.313                     |
| Y-resolution (mm)               | 0.313                     |

## **SOP 3.1: acquisition Knee Quantitative Computed Tomography (QCT) and Whole Body Low Dose Computed Tomography (WBLDCT)**

### **Aim Knee QCT**

To study the role of the (subchondral) bone in knee osteoarthritis using parameters including bone mineral density, anisotropy, inhomogeneity, variogram slope and entropy. To facilitate 3D shape analysis of the knee.

### **Aim WBLDCT**

To determine the severity of osteoarthritis in the hip and spine. The interest in the current study is primarily knee OA. The information from WBLDCT will be used to correct for OA in large joints other than the knee, to prevent bias when studying biochemical marker levels in serum and urine. Furthermore, WBLDCT data will facilitate shape analysis of the hip.

### **Duration of the procedure for the patient**

Acquisition and positioning of the patient will take approximately 10 minutes.

### **Preparation and prerequisites**

Standard radiation protection practices can be followed with general institutional policies and procedures for shielding.

- Digital image header should include the patient study identifier and not the patient's name or date of birth.
- Explain the examination procedure to the patient.
- Confirm presence of BMD calibration phantom, gel bag and internal rotation wedge.

### **Patient positioning for Knee QCT and for WBLDCT**

- Position the patient in a supine position on the CT-table.
- Both hands are placed flat on the CT-table next to the pelvis/legs.
- Both knees are as straight as possible.
- Index knee is on top of the BMD calibration phantom.
- If an air gap between BMD calibration phantom and knee is present use a gel bag to prevent any air gap between BMD calibration phantom and knee.
- Both feet are placed on a wedge ensuring 15 degree endo-rotation of the hip, with ankles in 90 degree flexion.

### **Scout**

- Acquire scout of the whole body in antero-posterior direction.

*APPROACH Clinical study protocol- Final version V1.0\_NL*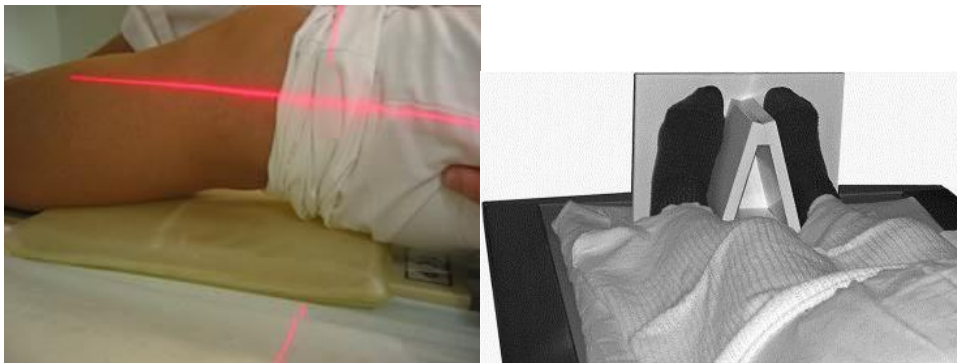**Knee QCT**

Both legs are scanned. Scanning length is 150mm, centered in z-direction on femoro-tibial articular space.

**Scan Technique**

|                          |                                                            |             |
|--------------------------|------------------------------------------------------------|-------------|
| Imaging System           | GE Discovery 750 HD / Toshiba Acquilion one / Philips ICON |             |
| Max dose for 70 kg adult | 0.25 mSv                                                   | required    |
| mAs                      | 220                                                        | required    |
| kV                       | 120                                                        | required    |
| Slice collimation        | 0.625mm or as close as possible                            | recommended |
| Pitch                    | 0.8 or as close as possible                                | recommended |
| Rotation time            | 1 second                                                   | recommended |

**Reconstruction Technique Knee QCT**

Please note: All reconstructions should of the knee QCT should use filtered back projection

*APPROACH Clinical study protocol- Final version V1.0\_NL***Reconstruction 1 QCT**

Center (x, z coordinates) of reconstruction 1 must include all bone of the index knee and the complete calibration phantom

|                 |                                  |
|-----------------|----------------------------------|
| Slice thickness | 0.625 mm or as close as possible |
| Increment       | 0.3 mm or as close as possible   |
| Kernel          | Medium Kernel                    |
| FOV             | 190 mm                           |

**Reconstruction 2 QCT**

Reconstruction 2 has a smaller FOV than reconstruction 1. It may not include the calibration phantom but must include all femur and tibia bones of the index knee

|                 |                                  |
|-----------------|----------------------------------|
| Slice thickness | 0.625 mm or as close as possible |
| Increment       | 0.3 mm or as close as possible   |
| Kernel          | Medium Kernel                    |
| FOV             | 130 mm                           |

**Reconstruction 3 QCT**

Reconstruction 3 should be identical to reconstruction 2, but a harder kernel should be used. Center of the reconstruction must be identical to reconstruction 2

|                 |                                  |
|-----------------|----------------------------------|
| Slice thickness | 0.625 mm or as close as possible |
| Increment       | 0.3 mm or as close as possible   |
| Kernel          | High resolution Kernel           |
| FOV             | 130 mm                           |

**Criteria of good quality knee QCT**

- Adequate coverage of tibia and femur of the index knee
- Inclusion of the complete calibration phantom in Reconstruction 1
- No significant movement artifacts
- No metal artifacts (exclude all subjects with knee prostheses etc.)
- No air gap between leg and phantom (use gel bags if necessary)
- No streak artifacts caused by air gap or metal parts



*APPROACH Clinical study protocol- Final version V1.0\_NL***WBLDCT**

Top of the scan area is marked by the petrous bone. The bottom of the scan area should include the whole feet. Instruct patient to hold inspiration while scan is conducted.

**Scan Technique WBLDCT**

|                          |                                                            |             |
|--------------------------|------------------------------------------------------------|-------------|
| Imaging System           | GE Discovery 750 HD / Toshiba Acquilion one / Philips ICON |             |
| Max dose for 70 kg adult | 3.0 mSv                                                    | required    |
| mAs                      | Dependent of dose modulation, reference 15 mAs             |             |
| kV Peak                  | 120 kV                                                     | recommended |
| Pitch                    | 0.9                                                        | recommended |
| Rotation time            | 0.75                                                       | recommended |
| Field of View            | Full FOV throughout scan                                   | recommended |

The above is based on acquisition using Philips IQON. For other vendors the protocol needs to be fine-tuned with a maximum dose of 3.0 mSv.

**Reconstruction Technique WBLDCT****Reconstruction 1 WBLDCT**

Should consist of axial slices covering the entire scan.

|                       |                              |             |
|-----------------------|------------------------------|-------------|
| Plane                 | Axial                        | required    |
| Reconstruction method | Iterative                    | recommended |
| Slice thickness       | 1 mm or as close as possible | required    |
| Increment             | 1 mm or as close as possible | required    |
| Kernel                | Medium                       | recommended |
| FOV                   | Full FOV throughout scan     | required    |

**Reconstruction 2 WBLDCT – left shoulder**

Should be centered on the center of the left humeral head and include humeral head and at least 2 cm of the left clavícula.

|                       |                                                                         |             |
|-----------------------|-------------------------------------------------------------------------|-------------|
| Plane                 | Axial                                                                   | required    |
| Reconstruction method | Iterative                                                               | recommended |
| Slice thickness       | 1 mm or as close as possible                                            | required    |
| Increment             | 1 mm or as close as possible                                            | required    |
| Kernel                | Medium                                                                  | recommended |
| FOV                   | 10 cm (enlarge if needed to include humeral head and 2 cm of clavícula) | recommended |

*APPROACH Clinical study protocol- Final version V1.0\_NL***Reconstruction 3 WBLDCT – right shoulder**

Should be centered on the center of the right humeral head and include humeral head and at least 2 cm of the right clavícula.

|                       |                                                                         |             |
|-----------------------|-------------------------------------------------------------------------|-------------|
| Plane                 | Axial                                                                   | required    |
| Reconstruction method | Iterative                                                               | recommended |
| Slice thickness       | 1 mm or as close as possible                                            | required    |
| Increment             | 1 mm or as close as possible                                            | required    |
| Kernel                | Medium                                                                  | recommended |
| FOV                   | 10 cm (enlarge if needed to include humeral head and 2 cm of clavícula) | recommended |

**Reconstruction 4 WBLDCT – cervical spine**

Should consist of axial slices of the full cervical spine (from petrous bone to spinal level T2).

|                       |                                                              |             |
|-----------------------|--------------------------------------------------------------|-------------|
| Plane                 | Axial                                                        | required    |
| Reconstruction method | Iterative                                                    | recommended |
| Slice thickness       | 1 mm or as close as possible                                 | required    |
| Increment             | 1 mm or as close as possible                                 | required    |
| Kernel                | Medium                                                       | recommended |
| FOV                   | 15 cm (enlarge if needed to include each vertebrae in whole) | recommended |

**Reconstruction 5 WBLDCT – thoracic spine**

Should consist of axial slices of the full thoracic spine (spinal level C7 to spinal level L1).

|                       |                                                              |             |
|-----------------------|--------------------------------------------------------------|-------------|
| Plane                 | Axial                                                        | required    |
| Reconstruction method | Iterative                                                    | recommended |
| Slice thickness       | 1 mm or as close as possible                                 | required    |
| Increment             | 1 mm or as close as possible                                 | required    |
| Kernel                | Medium                                                       | recommended |
| FOV                   | 15 cm (enlarge if needed to include each vertebrae in whole) | recommended |

**Reconstruction 6 WBLDCT – lumbar spine**

Should consist of axial slices of the full lumbar spine (spinal level T12 to os pubis).

|                       |                                                              |             |
|-----------------------|--------------------------------------------------------------|-------------|
| Plane                 | Axial                                                        | required    |
| Reconstruction method | Iterative                                                    | recommended |
| Slice thickness       | 1 mm or as close as possible                                 | required    |
| Increment             | 1 mm or as close as possible                                 | required    |
| Kernel                | Medium                                                       | recommended |
| FOV                   | 15 cm (enlarge if needed to include each vertebrae in whole) | recommended |

*APPROACH Clinical study protocol- Final version V1.0\_NL***Reconstruction 7 WBLDCT - hips**

Should consist of axial slices of the pelvis and femurs. 25 cm scan length and lower boundary should be 2 cm below the bottom of the lesser trochanters.

|                       |                              |             |
|-----------------------|------------------------------|-------------|
| Plane                 | Axial                        | required    |
| Reconstruction method | Iterative                    | recommended |
| Slice thickness       | 1 mm or as close as possible | required    |
| Increment             | 1 mm or as close as possible | required    |
| Kernel                | Medium                       | recommended |
| FOV                   | Full FOV                     | recommended |

**Reconstruction 8 WBLDCT –left hip**

Should consist of axial slices of the left femur starting 2 cm above femoral head. About 15 cm scan length and lower boundary should be 2 cm below the bottom of the lesser trochanters.

|                       |                              |             |
|-----------------------|------------------------------|-------------|
| Plane                 | Axial                        | required    |
| Reconstruction method | Filtered back projection     | recommended |
| Slice thickness       | 1 mm or as close as possible | required    |
| Increment             | 1 mm or as close as possible | required    |
| Kernel                | Medium                       | recommended |
| FOV                   | 15 cm centered on left hip   | recommended |

**Criteria of good quality WBLDCT**

- Complete coverage of at least cervical, thoracic and lumbar spine, shoulders, pelvis, legs and feet.
- Full FOV throughout scan.
- Z-resolution of less than 1 mm
- No significant movement artefacts

# SOP 7: APPROACH central data storage and transfer procedure; XNAT/ TranSMART platform

V 1.0 d.d. 08-05-2017

## 1. Background

The aim of the IMI APPROACH project is a better understanding of disease stratification and acceptance of a guideline to classify osteoarthritis patients. This will provide clear phenotypes directed protocols for disease modifying osteoarthritis drug trials enabling the targeting of subgroups with osteoarthritis that have uniform disease characteristics, thereby increasing the chances of success. Furthermore, one of the APPROACH consortium objectives is:

- Implement and establish a new, integrated and comprehensive database platform of existing data from partners that will be extended with newly collected longitudinal data, incorporating novel high quality biomarkers.

## 2. Central database platforms

As the central APPROACH database platform for storing and sharing clinical data, image assessment data, laboratory data, HandScan and motion analysis data (Table 1), the open-source [tranSMART](#) platform will be used. As the central APPROACH platform for sharing of MRI and X-ray images, the open source [XNAT](#) imaging software platform in combination with the [CTP](#) de-identification client will be used. Both central database platforms will be used to bring together the different data from the prospective APPROACH study. These systems are not the source systems of the data.

**Table 1.** Data types and central platforms

| Data type                                                                                                         | Source system              | APPROACH platform |
|-------------------------------------------------------------------------------------------------------------------|----------------------------|-------------------|
| Clinical data                                                                                                     | APPROACH eCRF              | tranSMART         |
| Image analysis data                                                                                               | Image analysis software    | tranSMART         |
| HandScan data                                                                                                     | HandScan system            | tranSMART         |
| Motion analysis data                                                                                              | Poseidon system            | tranSMART         |
| Laboratory data <ul style="list-style-type: none"> <li>• Biomarker data</li> <li>• Genomic marker data</li> </ul> | Reader instrument software | tranSMART         |
| MRI images                                                                                                        | PACS* (DICOM)              | TraIT XNAT        |
| Radiographs                                                                                                       | PACS* (DICOM)              | TraIT XNAT        |
| CT-scan images                                                                                                    | PACS* (DICOM)              | TraIT XNAT        |

\* Picture Archiving and Communication System

In order to store the newly collected longitudinal data of the APPROACH study in the central database platforms, a process and infrastructure for uploading the (source) data files into the database platforms has been set up. This document describes the infrastructure and processes. The [central tranSMART instance](#) used for the APPROACH study is hosted at the University of Luxembourg and managed through the IMI [eTRIKS](#) project. The central [XNAT](#) instance for the APPROACH study is the TraIT XNAT instance and is managed via [TraIT](#) resources.

## APPROACH Clinical study protocol- Final version V1.0\_NL

## 3. Data transfer processes

The data transfer processes, of the data types mentioned in Table 1, from the clinical sites to the central APPROACH transSMART and XNAT systems are described in Figure 1.

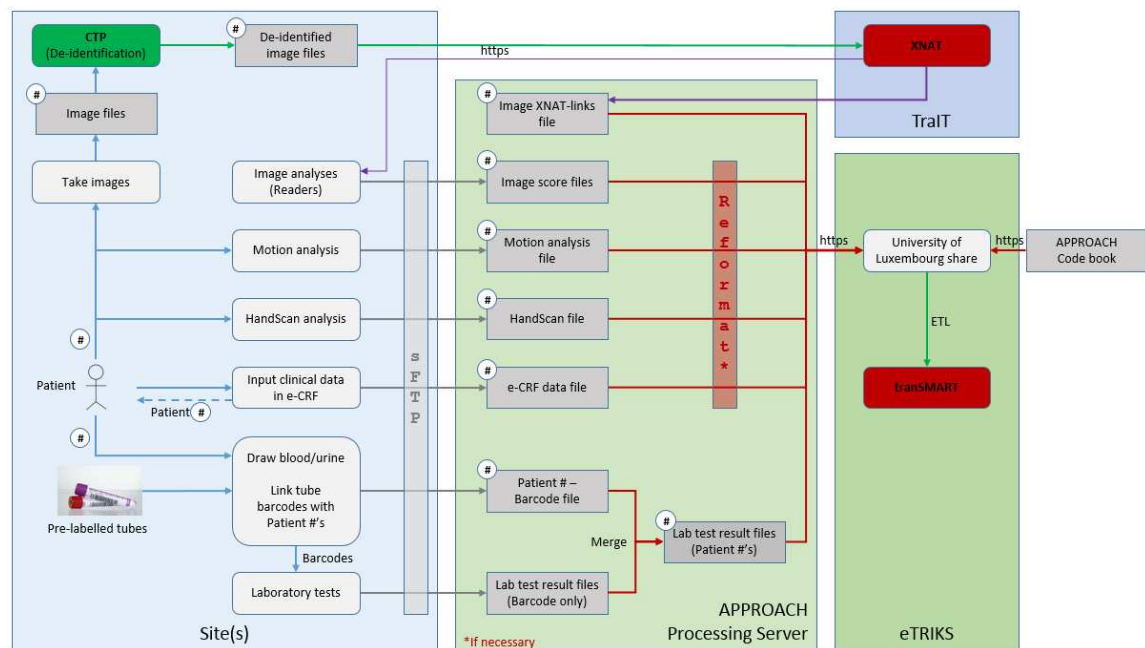

**Figure 1.** APPROACH study data transfers

### transSMART

Before being processed in the transSMART ETL (Extraction, Transformation and Loading) step, the sites have to upload the data files to a processing server via sFTP. From there the data files either will be copied directly to the University of Luxembourg share (in case the format is directly suited for ETL into transSMART) or they will be reformatted into a format suited for transSMART ETL. The files need to be reformatted if they do not fulfil the requirements as mentioned in section 4 of this SOP. The APPROACH project strives to only receive data files from the sites that are directly suited for copy into the University of Luxembourg share. Only data files without any personal or identifying data are allowed to be uploaded to the processing server. The (clinical) sites are responsible for this. The processing server is hosted by [Vancis](#). A Lygature administrator is responsible for managing access to the processing server and will manage the reformatting of any data files, if applicable. Access will be controlled via a username password combination. Appointed users only will be able to view and upload data files via an sFTP client. Persons that need to process the files will get read, write, and execute rights. The administrator can grant or revoke these permissions. To ensure that only the appropriate persons have access to the processing server, once every quarter an overview listing the current access permissions of every APPROACH project member, will be sent to the APPROACH Work Package leads. Based on their feedback, access will be updated if necessary.

People that have processing rights, will be able to logon to the processing server and perform processing using the applications available on the server. However, the goal is to have a little processing as possible. The processing will be done on a copy of the uploaded data file and the processing steps are recorded in a log file that also will be stored on the processing server. Data files suited for transSMART ETL will be copied to the University of Luxembourg share. The latter is being used by appointed eTRIKS personnel as the source location for performing the ETL (Extraction, Transformation and Loading) into transSMART.

## APPROACH Clinical study protocol- Final version V1.0\_NL

Linking of the data from different sources, is done via an *APPROACH patient number* (# in Figure 1 and 2) generated by the e-CRF. This *APPROACH patient number* is unique per patient and does not contain any personal information. This patient number needs to be present on every record of the data files generated.

### Screening

A subset of patients invited to the screening visit will be enrolled in the APPROACH cohort. The enrolment will be decided using a machine learning model trained to predict which patients are likely to become fast osteoarthritis progressors. The prediction will be based on the clinical and radiographic data collected at the screening visit (e-CRF data and KIDA scores (1); see also section 6.1 of the clinical study protocol). The data from the screening visits at each clinical site will be uploaded to transSMART. Periodically all new patient data (batches from all sites) will be analysed by the machine learning model. The data from a screening visit at each clinical site will be uploaded to transSMART in batches. The processing server will check the data for completeness and pass the patients data to eTRIKS for transSMART upload when both e-CRF data and KIDA scores are available. e-CRF data will be uploaded by Servier Data Management and the image Readers will upload the KIDA scores files to the processing server. The outcome of this analysis will be a ranking of patients ordered by a progression probability. The **ranking file** will be a CSV file containing the *APPROACH patient number*, rank and a set of descriptors from which the rank was derived from. The ranking data will be uploaded into transSMART (2) and used to centrally decide the patients' enrolment in the APPROACH cohort (3). The *APPROACH patient numbers* of the patients that should be enrolled will be emailed to the investigators of the corresponding sites (4). The complete data flow in the screening stage is shown in Figure 2.

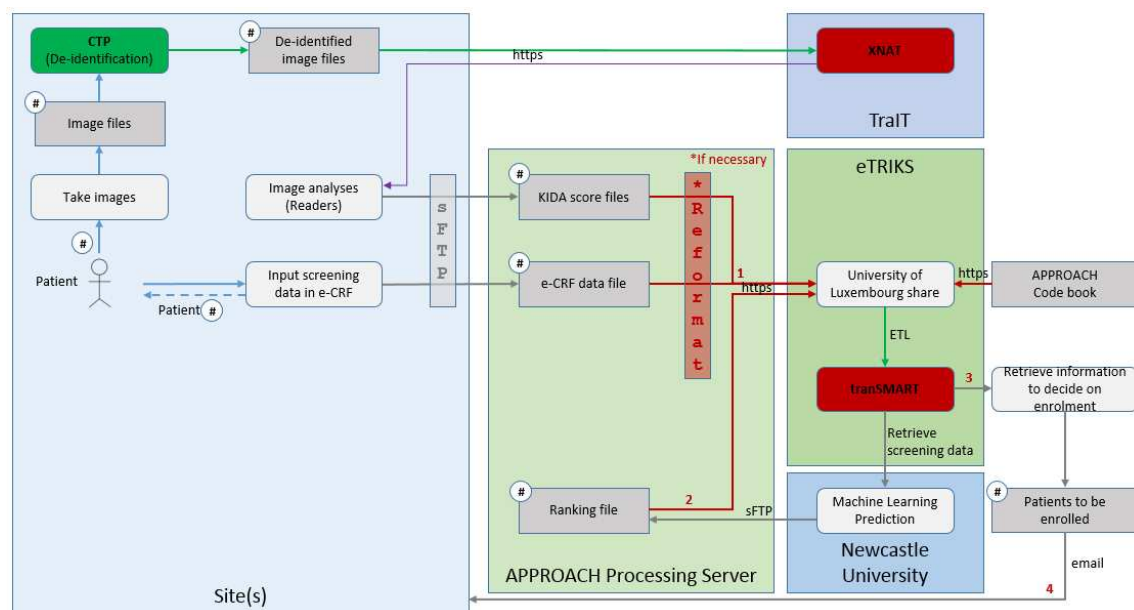

**Figure 2.** Data flow in the screening stage of the APPROACH study.

*APPROACH Clinical study protocol- Final version V1.0\_NL***XNAT**

The TraIT XNAT server, located in the Netherlands, will be used to centrally store the radiograph, CT and MRI images from the APPROACH study in DICOM format. Within the TraIT XNAT instance a protected APPROACH collection has been created, to which only appointed APPROACH people and TraIT XNAT administrators will have access. Table 2 describes the XNAT APPROACH user roles.

**Table 2.** APPROACH collection TraIT XNAT access roles

| User Role           | Modules and Main Features   |
|---------------------|-----------------------------|
| <b>Owner</b>        | Full Access                 |
| <b>Member</b>       | Full access except deleting |
| <b>Collaborator</b> | Only read access            |

The DICOM images will be uploaded to the central APPROACH XNAT instance using a locally installed CTP client. This CTP client de-identifies the image/DICOM files, by removing any identifying meta data in the DICOM file according to a “collection de-identification profile”, which has to be configured and tested per site. Via the CTP client the APPROACH patient number, which is stored in the DICOM file as a comment, will be copied into the DICOM Patient ID field (this is to be configured in the de-identification profile file). Only appointed local site personnel is allowed to start the de-identification and upload into XNAT using CTP.

Through the so-called [XNAT Gateway](#) many viewer applications can interface with XNAT. For more information on these capabilities see <http://xnat.bigr.nl/index.php/Xnat:Viewing>. Viewing and downloading is only possible via username/password logon.

**4. Data files for transSMART upload**

Data files for upload into transSMART should be delimited text files (*e.g.* CSV). The first line of the file should contain the parameter names and should be consistent across the APPROACH study. The other lines contain the data separated by a delimiter (preferably a “|”, but in any case it should be consistent). Furthermore, the data files should not contain the characters mentioned in the Table 3 and the data field length should not exceed 255 characters. All data files, except the laboratory result files, should contain the *APPROACH patient number* (as generated by the e-CRF) for each data record. The laboratory results files should contain the tube barcode on each data line. In a processing step these barcodes are amended with the *APPROACH patient numbers*. Furthermore, a data file is not allowed to contain any identifying data (*e.g.* name, social security number, full address, date of birth, etc.).

**Table 3.** Forbidden data file characters

| Forbidden character | Proposed to replace by |
|---------------------|------------------------|
| ∅                   | OE                     |
| Ä                   | AA                     |
| °                   | degr                   |
| μ                   | u                      |
| '                   | <depends>              |
| <superscript>       | <normal font>          |
| <subscript>         | <normal font>          |

## APPROACH Clinical study protocol- Final version V1.0\_NL

## 5. APPROACH codebook file

For the APPROACH study one codebook, describing all parameters determined in the APPROACH study, will be created. For the APPROACH transSMART upload the codebook file should be a CSV file containing the columns listed in Table 4. All columns should be present, even if they are empty.

**Table 4.** APPROACH codebook parameter meta data

| Column name              | Description                                                              |
|--------------------------|--------------------------------------------------------------------------|
| <b>Category 1</b>        | APPROACH main parameter category                                         |
| <b>Category 2</b>        | APPROACH parameter sub-category (optional)                               |
| <b>Category 3</b>        | APPROACH parameter sub-sub-category (optional)                           |
| <b>Parameter</b>         | Parameter name including time point/visit information                    |
| <b>BaseParameter</b>     | Parameter name, time point independent                                   |
| <b>Visit number</b>      | Visit indicator (e.g. Screening, Inclusion, Month 6, Month 12, Month 24) |
| <b>Short Description</b> | Short description of the (Base)parameter                                 |
| <b>Values</b>            | The possible values the parameter is allowed to have, separated by “;”   |

## 6. File life cycle

A sustainability plan will be created as part of the APPROACH project deliverables, which describes how the APPROACH transSMART and XNAT instances and data will be sustained.

The files uploaded to the remote desktop will remain on that share until 1 month after the APPROACH project has finished. After that the files will be deleted from the remote processing environment. The same holds true for the University of Luxembourg share.

## 7. transSMART ETL

From the University of Luxembourg share, <https://owncloud.lcsb.uni.lu/>, eTRIKS representatives at the University of Luxembourg will take the files for ETL (Extraction, Transformation and Loading) into the APPROACH transSMART instance, following the eTRIKS procedures for uploading into transSMART ([transSMART ETL Guide.pdf](#)). A high-level description of this is given in Figure 3. The column mapping and tooltips files will initially be created, based on the parameters file and re-used for consecutive data file uploads.

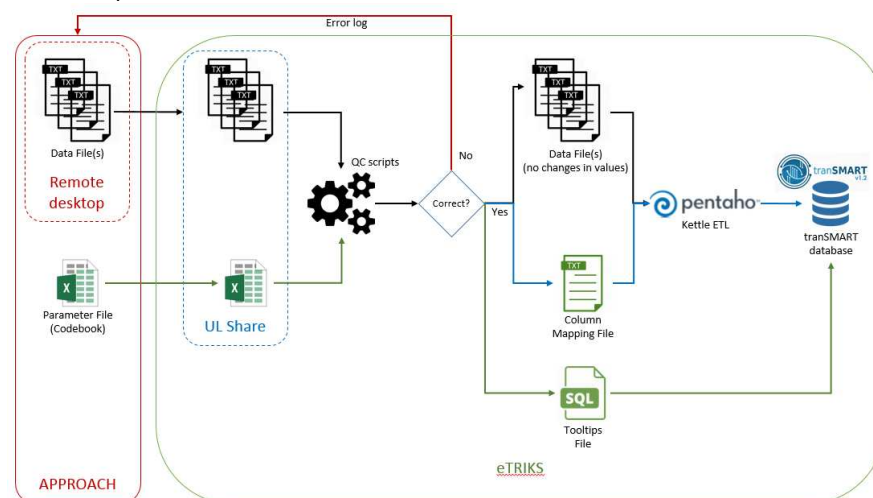

**Figure 3.** The APPROACH transSMART ETL process



## SOP 8: HandScan measurements

V1.0 d.d. 29-JAN-2016

### Aim

To assess inflammation of hand and wrist joints at Inclusion and M024.

### Duration of the procedure for the patient

A complete measurement run takes less than 3 minutes

### Preparation and prerequisites

- The operator has to be certified by Hemics for using the HandScan
- Always operate according to the instructions in the Hemics HandScan User Manual.
- Remain present in the investigating room with the patient during the complete measurement procedure.
- During a measurement the device's lid has to be closed.

### Acquisition

Log on to the user interface of the HandScan (username and password needed).

Before evaluation create a new patient identification or select the existing patient.

### Patients

- Be sure that the patient does not wear any jewelry (including watches) on arms, wrists, and fingers, that can be easily removed. NOTE: Do not remove jewelry if force is needed, to prevent artificial changes in blood flow.
- Support the patient in the right comfortable and upright position
- Verify that the patient doesn't move during the measurement process.

### Measurement protocol

- Ask the patient to put his/her hands in the appropriate positions inside the cuffs and on the hand rests. The hands should be positioned such that the thumbs and index finger touch the hand positioning wedge (see image below). Verify that the fingers are comfortably and equally spread within the illumination area.
- Click the button **New Measurement** and subsequently **Start Measurement**.
- Monitor the patient and the measurement progress.
- The measurement process stops automatically when it is completed. The "lasers active" indicator disappears.
- The device's lid can now be opened. Instruct the patient to remove his/her hands from the scanner.
- NOTE: The hand rests must be cleaned after each measurement.

### Analysis

- After a measurement the scanner automatically starts with phase 1 of the data analysis which may take about ten seconds.
- After you have completed a measurement, the software calculates the sizes and positions of the reference and joint ROIs automatically, and projects these on a reflection image in the **ROI Positioning** screen
- In case ROIs are not at the right place they have to be moved manually according to figure 3.
- Joints need to be excluded in case of e.g. a prosthesis, or jewelry is present on the reference position or joint ROI, using the exclusion button.
- From the **ROI Positioning** screen, click the **Start Analyze** button.

*APPROACH Clinical study protocol- Final version V1.0\_NL*

- The data analysis takes about 30 seconds to complete, after which the software automatically proceeds to the screen **View/Print Results**.
- Click the button **Approve Scan** to actually approve that a scan was performed technically correct.

**Quality check**

- All relevant joint and reference positions have been illuminated (not very dark) and not over-illuminated (not completely white)
- ROIs are at the proper position
- No jewelry, prosthesis or other artifact at joint or reference ROI

**Outcome parameters for database**

Patient identification number      x-xxx  
Date of image                              DD-MM-YYYY

|                             | <i>unit</i>      | <i>min. value</i> | <i>max. value</i> |
|-----------------------------|------------------|-------------------|-------------------|
| inflammation left CMC1      | continuous value | 0                 | 3                 |
| inflammation left PIPs (5)  | continuous value | 0                 | 3                 |
| inflammation left DIPs (5)  | continuous value | 0                 | 3                 |
| inflammation left MCPs (5)  | continuous value | 0                 | 3                 |
| inflammation left thumb IP  | continuous value | 0                 | 3                 |
| inflammation left wrist     | continuous value | 0                 | 3                 |
| inflammation right CMC1     | continuous value | 0                 | 3                 |
| inflammation right PIPs (5) | continuous value | 0                 | 3                 |
| inflammation right DIPs (5) | continuous value | 0                 | 3                 |
| inflammation right MCPs (5) | continuous value | 0                 | 3                 |
| inflammation right thumb IP | continuous value | 0                 | 3                 |
| inflammation right wrist    | continuous value | 0                 | 3                 |

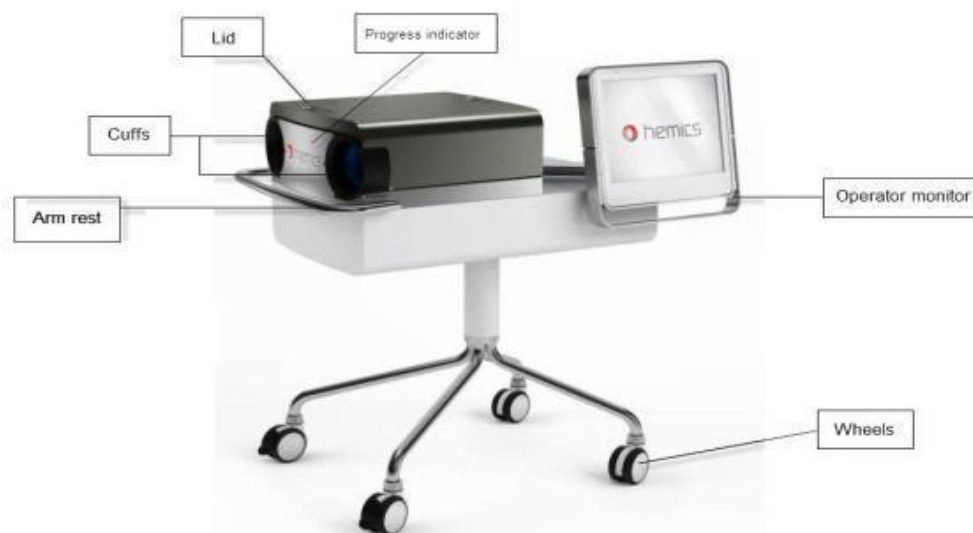**Figure 1 HandScan**

APPROACH Clinical study protocol- Final version V1.0\_NL

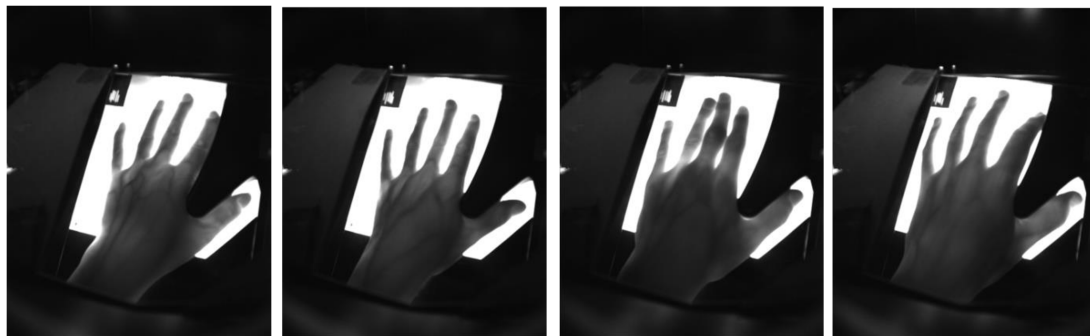

Proper placement:  
Thumb and index finger placed against positioning wedge  
Fingers comfortably spread

Index finger not placed against positioning wedge

Index finger not placed against positioning wedge  
Fingers 2-4 not spread

Hand not flat on glass surface

Figure 2 Hand positioning

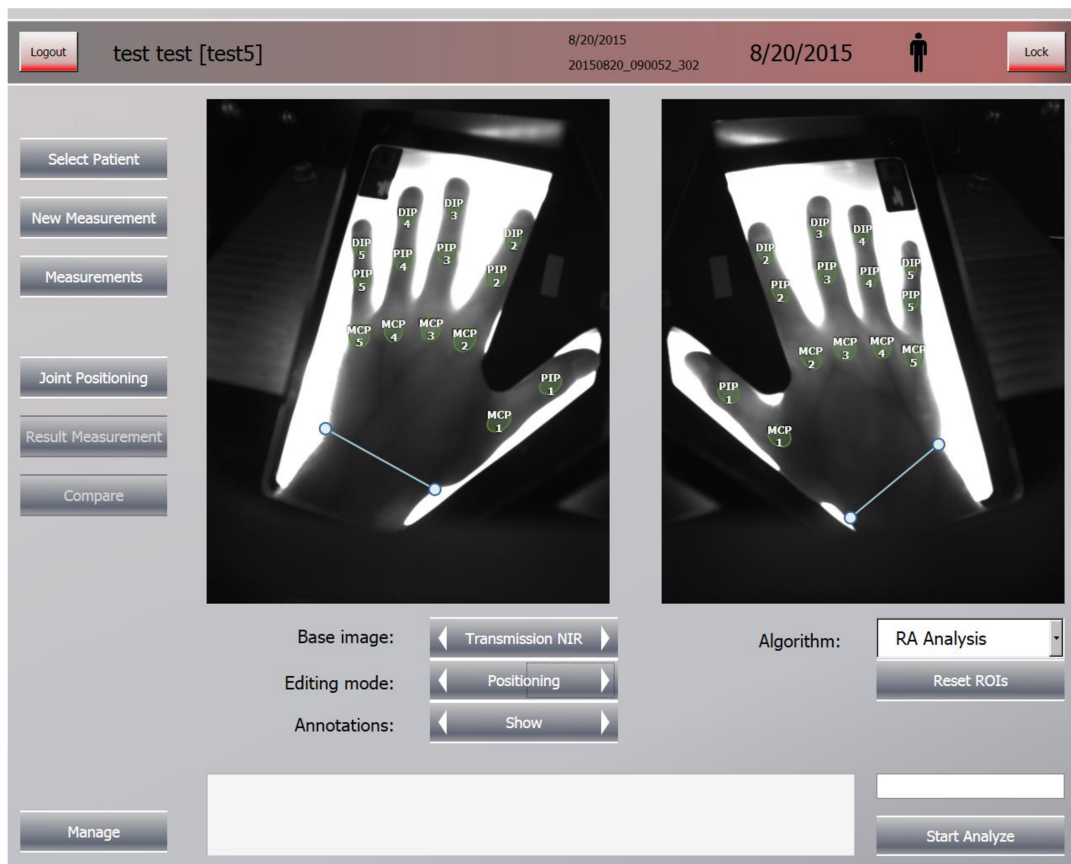

Figure 3 User interface for adjusting region of interest positions

## **SOP 9.1: Motion analysis**

V1.0 d.d. 29-01-2016

### **Aim**

To determine motion characteristics of knee and hip joints at inclusion, M006 and M024

### **Duration of the procedure for the patient**

A complete measurement takes between 15 and 20 minutes.

### **Preparation and prerequisites**

- The operator has to be trained by ETB personnel (European Technology for business LTD, UK)
- A 20 m quiet (discrete) straight corridor has to be available
- Always operate according to the instructions in the GaitSmart User Manual.
- Patients need to wear flat or low heeled shoes with proper support and use the same footwear at baseline and 6 months evaluation if possible.
- Pain medication questionnaires have to be filled out.

### **Acquisition**

- GaitSmart™ comprises six sensor modules with accompanying Velcro straps. The sensors are inertial measurement units and contain three orthogonal gyroscopes and three orthogonal accelerometers that measure angular velocity and acceleration.
- The six sensors must first be synchronized using the dedicated software (Poseidon) and then disconnected from the computer.

### *Patients*

- Each sensor is switched on and then mounted in to the appropriate pocket within Velcro straps (according to the manual).
- The Velcro straps must be applied on the lateral sides of the hip, just above the iliac crest, the thigh, just below the greater trochanter and the belly of the gastrocnemius muscle of the calf (according to the images in the manual).

### *Measurement protocol*

- Patients must stand still for ten seconds in order to calibrate the sensors.
- Subsequently each patient must walk up and down a 20 meter corridor at their self-selected speed.
- Once the evaluation is completed the sensors must be removed from the straps, switched off and attached back to the laptop via the USB connectors.

### **Analysis**

- Poseidon software will then be used to analyse the data.
- The observer must choose a minimum of 5 strides where the stride duration was continuous to within 5% of the mean and from this the most representative stride of the gait pattern will be calculated automatically, i.e. the stride with the lowest error compared to the other strides. This must then be indicated within the programme and a report prepared.

*APPROACH Clinical study protocol- Final version V1.0\_NL*

- The gait parameters are provided for this stride and shown graphically and in tabular form. Gait parameters included pelvis, hip, thigh, knee and calf range of motion in the sagittal plane; thigh and calf medial-lateral movement; knee stance flexion; joint and segment symmetry and stride duration.
- All data provided in the report is also saved in a csv file that will be stored by ETB. For the overall project database, a restricted dataset will be saved. This set has been shown to be the main predictors of the severity of knee OA. Knee ROM in swing and stance and hip ROM is stored for both the affected and non-affected side.

**Outcome parameters for database:**

Patient identification number      x-xxx  
 Date of image                              DD-MM-YYYY

|                       | <i>unit</i> | <i>min. value</i> | <i>max. value</i> |
|-----------------------|-------------|-------------------|-------------------|
| ROM swing left knee   | degrees     | 0                 | 80                |
| ROM swing right knee  | degrees     | 0                 | 80                |
| ROM left hip          | degrees     | 0                 | 80                |
| ROM right hip         | degrees     | 0                 | 80                |
| ROM stance left knee  | degrees     | 0                 | 80                |
| ROM stance right knee | degrees     | 0                 | 80                |

**Figure 1: GaitSmart application**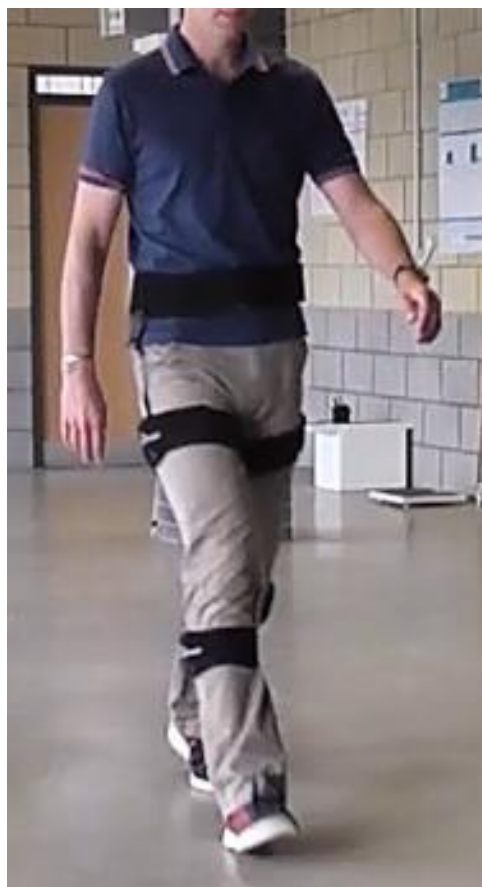

## SOP 9.2: Performance based test

### 40m (4x10m) Fast Paced Walk Test

Recommendations on performance-based tests to assess physical function in people diagnosed with hip or knee osteoarthritis. OARSI website

**Abbreviation:** 40m FPWT

**Purpose / Domains:**

A test of short distance walking activity.

A test of walking speed over short distances and changing direction during walking.

**Description:**

A fast-paced walking test that is timed over 4 x 10m (33 ft) for a total 40 m (132 ft) (1).

**Guidelines for use:**

As a direct measure of the ability to walk quickly over short distances, which is an activity that is important but often limited in people with hip and/or knee OA.

**Equipment:**

- Timer/stop watch.
- 10 m (33 ft) marked walkway with space to turn safely around at each end.
- 2 cones placed approximately 2 metres beyond each end of the 10m walkway.
- Calculator to convert time to speed.

**Preparation:**

*Environment*

- Mark out a 10 m (33 ft) walkway with bright coloured tape at each end.
- Place a cone approximately 2 metres before the start mark and 2 metres beyond the finish mark of the 10m walkway for turning.
- Ensure there is enough space to turn safely around at each end (i.e. 2-3m each end).

*Participant*

Comfortable walking footwear (e.g. tennis shoes/cross trainers) should be worn.

*Tester*

- If safety is of concern, the tester should follow slightly behind and off to one side to the participant but not as to pace or impede them.
- If there is no concern for safety, the tester should follow well to the side so as they can view crossing at the 10m walkway at both ends.

*Practice*

A practice trial of 1-2 turns is recommended before testing to check understanding.

**Procedure:**

- Participants are asked to walk as quickly but as safely as possible, without running, along a 10 m (33 ft) walkway and then turn around a cone, return then repeat again for a total distance of 40 m (132 ft) (3 turns).
- Regular walking aid is allowed and recorded.

*APPROACH Clinical study protocol- Final version V1.0\_NL***Verbal instructions**

"For this test, do the best you can by going as fast as you can, without running, but don't push yourself to a point of overexertion or beyond what you think is safe for you.

1. Start with both feet on the start line.
2. On start, walk as quickly but as safely as possible, without running.
3. Walk up to the end cone, turn around and walk back to the starting cone behind you, turn again and back to the end cone, then turn once more and return back to the start cone again so that you walk the 10m walkway 4 times in total.
4. Get ready and START".

**Scoring**

- Timing starts on the signal to start at the start line and terminates once the participant crosses back over the start line after completing the 40 m (4x10 m).
- When the participant crosses the 10m mark, timing is paused whilst the participant turns around the cone and then is resumed once they cross the 10m mark again. The same is repeated for the following turns and is stopped once the participant crosses the start line for the final time.
- Time of one trial is recorded to the nearest 100th of a second.
- Time of one test trial is recorded and expressed as speed m/s by dividing distance (40m) by time (s).
- Regular walking aid is allowed and use should be recorded.

**Minimal reporting standards:**

Assistive devices such as usual walking aids - walking stick etc.

N.B. The individual should use the assistive device (if any) they would normally use to perform the activity at the time of testing, irrespective of how they performed it previously. However, if an assistive device/rail is used, then it should be recorded for that occasion.

**References:**

1. Wright AA, Cook CE, Baxter GD, Dockerty JD, Abbott JH. A Comparison of 3 Methodological Approaches to Defining Major Clinically Important Improvement of 4 Performance Measures in Patients With Hip Osteoarthritis. *J Orthop Sports Phys Ther.* 2011;41:319-27.

**40m (4 x 10m) Fast Paced Walk Test Score Sheet:**

| Date      | Assistive walking aid (list) | Time (seconds: 00.00) | Speed (40/time in seconds) (0.00 m/sec) | Adaptations                                                                                                                                |
|-----------|------------------------------|-----------------------|-----------------------------------------|--------------------------------------------------------------------------------------------------------------------------------------------|
| 1.<br>/ / |                              |                       |                                         | <input type="checkbox"/> Uses walking aid<br><input type="checkbox"/> Not tested – Unable<br><input type="checkbox"/> Not tested - refused |
| 2.<br>/ / |                              |                       |                                         | <input type="checkbox"/> Uses walking aid<br><input type="checkbox"/> Not tested – Unable<br><input type="checkbox"/> Not tested - refused |
| 3.<br>/ / |                              |                       |                                         | <input type="checkbox"/> Uses walking aid<br><input type="checkbox"/> Not tested – Unable<br><input type="checkbox"/> Not tested - refused |
| 4.<br>/ / |                              |                       |                                         | <input type="checkbox"/> Uses walking aid<br><input type="checkbox"/> Not tested – Unable<br><input type="checkbox"/> Not tested - refused |
| 5.<br>/ / |                              |                       |                                         | <input type="checkbox"/> Uses walking aid<br><input type="checkbox"/> Not tested – Unable<br><input type="checkbox"/> Not tested - refused |

## 30-second Chair Stand Test

Recommendations on performance-based tests to assess physical function in people diagnosed with hip or knee osteoarthritis. OARSI website

**Abbreviation:** 30s-CST

**Purpose / Domains:**

A test of sit-to-stand activity.

Also a test of lower body strength and dynamic balance.

**Description:**

The maximum number of chair stand repetitions possible in a 30 second period (1-3).

**Equipment:**

- Timer/stop watch.
- Straight back chair with a 44cm (17 inch) seat height, preferably without arms.
- Same chair should be used for re-testing within sites.

**Preparation**

*Environment*

Ensure the chair cannot slide backwards by placing the back of the chair against a wall.

*Participant*

- Comfortable walking footwear (e.g. tennis shoes/cross trainers) should be worn.
- The participant sits in the chair in a position that allows them to place their feet flat on the floor, shoulder width apart, with knees flexed slightly more than 90 degrees so that their heels are somewhat closer to the chair than the back of their knees.
- The arms are crossed at the wrists and held close to the chest (across chest).

*Tester*

The tester stands close to the side of the chair for safety and so as they can observe the technique, ensure that the participant comes to a full stand and full sit position during the test.

*Practice*

A practice trial of one or two slow paced repetitions is recommended before testing to check technique and understanding.

**Procedure**

- From the sitting position, the participant stands up completely up so hips and knees are fully extended, then completely back down, so that the bottom fully touches the seat. This is repeated for 30 seconds.
- Same chair should be used for re-testing within site.
- If the person cannot stand even once then allow the hands to be placed on their legs or use their regular mobility aid. This is then scored as an adapted test score.

*Verbal instructions*

*"For this test, do the best you can by going as fast as you can but don't push yourself to a point of overexertion or beyond what you think is safe for you.*

1. *Place your hands on the opposite shoulder so that your arms are crossed at the wrists and held close across your chest. Keep your arms in this position for the test.*
2. *Keep your feet flat on the floor and at shoulder width apart.*



*APPROACH Clinical study protocol- Final version V1.0\_NL*

3. On the signal to begin, stand up to a full stand position and then sit back down again so as your bottom fully touches the seat.

4. Keep going for 30 seconds and until I say stop.

5. Get ready and START".

**Scoring**

- On the signal to begin, start the stop watch. Count the total number of chair stands (up and down equals one stand) completed in 30 seconds. If a full stand has been completed at 30 seconds (i.e. standing fully erect or on the way down to the sitting position), then this final stand is counted in the total.
- The participant can stop and rest if they become tired. The time keeps going.
- If a person cannot stand even once then the score for the test is zero.
- Next, allow the hands to be placed on their legs or use their regular mobility aid. If the person can stand with adaptations, then record the number of stands as an adapted test score (see score sheet). Indicate the adaptations made to the test.

**Minimal reporting standards**

- Chair height.
- Adaptations – such as using hands on legs or using a walking aid.

N.B. The individual should use the assistive device (if any) they would normally use to perform the activity at the time of testing, irrespective of how they performed it previously. However, if an assistive device/rail is used, then it should be recorded for that occasion.

**REFERENCES**

1. Gill S, McBurney H. Reliability of performance-based measures in people awaiting joint replacement surgery of the hip or knee. *Physiother Res Int.* 2008;13(3):141-52.
2. Jones CJ, Rikli RE, Beam WC. A 30-s chair-stand test as a measure of lower body strength in community-residing older adults. *Res Q Exerc Sport.* 1999;70(2):113-9.
3. Kreibich DN, Vaz M, Bourne RB, Rorabeck CH, Kim P, Hardie R, et al. What is the best way of assessing outcome after total knee replacement? *Clin Orthop Relat Res.* 1996(331):221-5.

**30-second Chair Stand Test Score Sheet:**

| Time point<br>Date | Chair seat<br>height<br>(cm) | Score<br>(Repetitions in<br>30 seconds) | Adaptations                                                                                                                                                                               | Adapted<br>score |
|--------------------|------------------------------|-----------------------------------------|-------------------------------------------------------------------------------------------------------------------------------------------------------------------------------------------|------------------|
| 1.<br>/ /          | cm                           |                                         | <input type="checkbox"/> Uses hands on legs<br><input type="checkbox"/> Uses walking aid<br><input type="checkbox"/> Not tested – Unable<br><input type="checkbox"/> Not tested - refused |                  |
| 2.<br>/ /          | cm                           |                                         | <input type="checkbox"/> Uses hands on legs<br><input type="checkbox"/> Uses walking aid<br><input type="checkbox"/> Not tested – Unable<br><input type="checkbox"/> Not tested - refused |                  |
| 3.<br>/ /          | cm                           |                                         | <input type="checkbox"/> Uses hands on legs<br><input type="checkbox"/> Uses walking aid<br><input type="checkbox"/> Not tested – Unable<br><input type="checkbox"/> Not tested - refused |                  |
| 4.<br>/ /          | cm                           |                                         | <input type="checkbox"/> Uses hands on legs<br><input type="checkbox"/> Uses walking aid<br><input type="checkbox"/> Not tested – Unable<br><input type="checkbox"/> Not tested - refused |                  |
| 5.<br>/ /          | cm                           |                                         | <input type="checkbox"/> Uses hands on legs<br><input type="checkbox"/> Uses walking aid<br><input type="checkbox"/> Not tested – Unable<br><input type="checkbox"/> Not tested - refused |                  |

--> If the score is adapted (i.e., if the patient uses an adapted strategy, such as using hands on legs or using a walking aid), the score will be zero.

## SOP 10.1: collection of biosamples: blood and urine

V1.0 d.d. 23-08-2016

### Aim

To evaluate prediction of progression of osteoarthritis of the knee and to determine the change in biomarkers with the severity of osteoarthritis of the knee.

### Duration of the procedure for the patient

Blood sampling and urine collection will take 10-15 minutes.

### Preparation and prerequisites (see flowcharts at end of SOP 10.2 for collection and processing relationship for each visit)

Blood should be collected using standard venipuncture techniques present at each clinical center. Care should be taken to attempt to draw all blood samples (i.e. different collection tubes) via a single venipuncture. Preferred order of collection of blood tubes are listed below. Each serum sample will be collected as close as possible to the planned time detailed in the protocol. For urine collection patients are asked to provide a midstream urine sample into a collection container.

The date, exact time, that each sample is collected, and fasted or non-fasted status will be recorded in the source documents.

### Blood collection

*Details per subject per visit:*

Materials needed for blood collection (per subject, at inclusion visit M000):

- 3 x ≥7mL serum separator blood collection tubes
- 1 x ≥7.0mL EDTA blood collection tube
- 1 x 8.5mL PAXgene Blood DNA tube (at room temperature (18-25°C) prior to use)
- 1 x 2.5mL PAXgene Blood RNA tube (at room temperature (18-25°C) prior to use)

| Inclusion visit M000 | Collection Tube Type | # of Collection Tubes | Approximate Volume/Tube (mL) | Total Volume (mL) | Draw Order |
|----------------------|----------------------|-----------------------|------------------------------|-------------------|------------|
| Serum                | Serum Separator      | 3                     | 7                            | 21                | 1          |
| Plasma               | EDTA                 | 1                     | 7                            | 7                 | 2          |
| DNA                  | PAXgene Blood DNA    | 1                     | 8.5                          | 8.5               | 3          |
| RNA                  | PAXgene Blood RNA    | 1                     | 2.5                          | 2.5               | 4          |
| <b>Total/Visit</b>   |                      | <b>6</b>              |                              | <b>39</b>         |            |

Materials needed for blood collection (per subject, Visits M006 and M012):

- 3 x ≥7mL capacity serum separator blood collection tubes

| Visits M006 & M012 | Collection Tube Type | # of Collection Tubes | Approximate Volume/Tube (mL) | Total Volume (mL) | Draw Order |
|--------------------|----------------------|-----------------------|------------------------------|-------------------|------------|
| Serum              | Serum Separator      | 3                     | 7                            | 21                | 1          |
| <b>Total/Visit</b> |                      | <b>3</b>              |                              | <b>21</b>         |            |

*APPROACH Clinical study protocol- Final version V1.0\_NL***Materials needed for blood collection (per subject, Visit M024):**

- 3 x ≥7mL serum separator blood collection tubes
- 1 x 8.5mL PAXgene Blood DNA tube (at room temperature (18-25°C) prior to use)
- 1 x 2.5mL PAXgene Blood RNA tube (at room temperature (18-25°C) prior to use)

| Visit M024         | Collection Tube Type | # of Collection Tubes | Approximate Volume/Tube (mL) | Total Volume (mL) | Draw Order |
|--------------------|----------------------|-----------------------|------------------------------|-------------------|------------|
| Serum              | Serum Separator      | 3                     | 7                            | 21                | 1          |
| DNA                | PAXgene Blood DNA    | 1                     | 8.5                          | 8.5               | 2          |
| RNA                | PAXgene Blood RNA    | 1                     | 2.5                          | 2.5               | 3          |
| <b>Total/Visit</b> |                      | <b>5</b>              |                              | <b>32</b>         |            |

*Procedure*

1. Apply barcode label to blood collection tube
  - a. **Note: See SOP 10.3 for cross-referencing Patient number with APPROACH WP2 Clinical Centre Excel spreadsheet and eCRF**
2. Collect blood according to the table, using standard venipuncture technique
  - a. for serum into serum separator tubes, gently invert (do not shake) the tube 5 times, and keep the tubes upright at room temperature.
  - b. for plasma into EDTA blood collection tubes, gently invert (do not shake) the tube 8-10 times, and keep it on ice.
  - c. for DNA into PAX gene DNA blood collection tubes, gently invert the tube 8-10 times, and keep it at room temperature.
  - d. for RNA into PAX gene RNA blood collection tubes, gently invert the tube 8-10 times, and keep it at room temperature.
3. **Within 4 hours after collection** prepare the blood for serum storage according to SOP 10.2.
4. **Within 4 hours after collection** prepare the EDTA blood collection tubes for plasma storage according to SOP 10.2.
5. **Within 4 hours after collection** prepare the PAX gene DNA and PAX gene RNA blood collection tubes for storage according to SOP 10.2.

**Urine collection****Materials needed for urine collection (per subject, Visits M000-M024):**

- 1 x 50 mL primary urine collection container

*Procedure*

1. For each visit, ask the patient to collect a midstream urine sample (~50mL) into a primary urine collection container and store on ice.

Within 4 hours after collection prepare the urine sample for storage according to SOP 10.2.

## SOP 10.2: processing of biosamples: blood and urine

V1.0 d.d. 23-08-2016

**Serum sample processing (see flowcharts at end of SOP 10.2 for collection and processing relationship for each visit)**

Materials for Serum only (Per Subject, per time point):

- 1 x 15.0mL sterile conical tube for pooling
- 13 x 1.0mL sterile screw cap cryotubes
- 1 x 5.0mL sterile screw cap cryotube

Materials for Serum only cryostorage (total/study)

- 240 (10x10) cryoboxes for 1.0mL cryotubes labelled specifically for distribution to testing/storage sites
- 20 (10x10) cryoboxes for 5.0mL cryotubes labelled specifically for distribution to storage site

*Procedure*

1. **Within 4 hours after collection**, centrifuge serum separator tubes at 2500 x g for 15 minutes, approximately 4°C in a refrigerated centrifuge equipped with a swing-bucket rotor.
2. Remove the blood collection tube cap carefully to avoid disturbing the pellet or causing splashing of the blood. **The serum samples should not contain red blood cells/clot** (due to either a pipetting error (aspiration of the blood clot) or perturbation of the blood clot). Care should be taken to avoid haemolysis of the sample.
3. Transfer serum from the three serum separator tubes at each visit using a sterile pipette and combine in a single 15 mL sterile conical tube to form a pooled sample for aliquotting. **Care should be taken to avoid taking any red blood cells over into the serum.**
4. Gently invert 15 mL tube containing pooled serum 5-10 times to generate a uniform sample.
5. A pipette with appropriate filter tip should be used to transfer thirteen 0.5mL and one 5.0mL aliquots of serum into supplied labelled cryotubes.

Aliquots should be filled in the order 01-14 with volumes as indicated below example for Visit M000.

| Aliquot Number | Volume (mL)     |
|----------------|-----------------|
| 01-13          | 0.5             |
| 14             | Remainder, ~5.0 |

*APPROACH Clinical study protocol- Final version V1.0\_NL*

6. Barcode labels are applied to sample aliquot tubes in a vertical orientation (shown below) to ensure compatibility with the barcode reader.

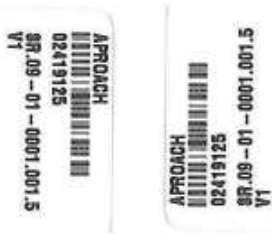

OR

7. Freeze and store the cryotubes immediately at -70°C to -80°C freezer.

Cryotube Storage and sample log for distribution:

A separate SOP and training will be provided to clinical centres for sample entry for storage/distribution using barcode readers and sample inventory software.

**Sample Testing/Storage Site Information**

| Distribution Site | Analysis                                   | Sample Type(s)  | Sampling Visits | Aliquots (per visit) | Aliquot Volume (mL)     | Subjects | Total Visits (per subject) | Total Tubes              | # of (10x10) cryoboxes | Aliquot #s (from barcode label) |
|-------------------|--------------------------------------------|-----------------|-----------------|----------------------|-------------------------|----------|----------------------------|--------------------------|------------------------|---------------------------------|
| Nordic Bioscience | Biomarker                                  | Serum           | M000-M024       | 5                    | 0.5                     | 500      | 4                          | 10000                    | 100                    | SR .5-.9                        |
| Artialis          | Biomarker                                  | Serum           | M000-M024       | 3                    | 0.5                     | 500      | 4                          | 6000                     | 60                     | SR .10-.12                      |
| Lund              | Biomarker                                  | Serum           | M000-M024       | 3                    | 0.5                     | 500      | 4                          | 6000                     | 60                     | SR .13-.15                      |
| Surrey            | Metabolomics                               | Plasma          | M000            | 2                    | 0.5                     | 500      | 1                          | 1000                     | 10                     | PL .2-.3                        |
| Sergas            | Proteomics                                 | Plasma          | M000            | 2                    | 0.5                     | 500      | 1                          | 1000                     | 10                     | PL .4-.5                        |
| LUMC              | Lipidomics                                 | Plasma          | M000            | 2                    | 0.5                     | 500      | 1                          | 1000                     | 10                     | PL .6-.7                        |
| AbbVie            | Transcriptomics<br>Genomics<br>Epigenetics | DNA and RNA     | M000 and M024   | 1 DNA<br>1 RNA       | 8.5 DNA<br>2.5 RNA      | 500      | 2                          | 1000 DNA<br>1000 RNA     | 10 DNA<br>10 RNA       | DN .1<br>RN .1                  |
| BST               | Short Term Storage                         | Serum           | M000-M024       | 2                    | 0.5                     | 500      | 4                          | 4000                     | 40                     | SR .16-.17                      |
| BST               | Long Term Storage                          | Serum and Urine | M000-M024       | 1 Serum<br>1 Urine   | 5.0 Serum<br>10.0 Urine | 500      | 4                          | 2000 Serum<br>2000 Urine | 20 Serum<br>20 Urine   | SR .18<br>UR .3                 |

The cryotubes should be placed into labelled cryoboxes (10x10). The cryobox will be filled from the left hand corner (A1) with aliquots being filled left to right top to bottom.

*APPROACH Clinical study protocol- Final version V1.0\_NL*

|   | 1 | 2 | 3 | 4 | 5 | 6 | 7 | 8 | 9 | 10 |
|---|---|---|---|---|---|---|---|---|---|----|
| A | — | — | — | — | — | — | — | — | — | —  |
| B | — | — | — | — | — | — | — | — | — | —  |
| C | — | — | — | — | — | — | — | — | — | —  |
| D | — | — | — | — | — | — | — | — | — | —  |
| E | — | — | — | — | — | — | — | — | — | —  |
| F | — | — | — | — | — | — | — | — | — | —  |
| G | — | — | — | — | — | — | — | — | — | —  |
| H | — | — | — | — | — | — | — | — | — | —  |
| I | — | — | — | — | — | — | — | — | — | —  |
| J | — | — | — | — | — | — | — | — | — | —  |

The cryobox is placed immediately into -70°C to -80 °C freezer for storage. New aliquots may be placed into a partially filled box. This should be done such that the thawing effect on the samples already frozen is minimised. Samples should never reach a temperature of  $\geq -20$  °C.

### Plasma Sample Processing

#### Materials for Plasma only (Per Subject, per time point):

- 1 x 15.0mL sterile conical tube for pooling
- 4 x 1.0mL sterile screw cap cryotubes with colored (red) cap indicator insert
- 2 x 1.0mL sterile glass vials prefilled with 0.5mL methanol for Lipidomic samples

#### Materials for Plasma only cryostorage (total/study)

- 20 (10x10) cryoboxes labelled specifically for distribution to Proteomic and Metabolomic testing sites
- 10 (10x10) cryoboxes labelled specifically for distribution to Lipidomic testing/storage site (LUMC)

#### *Procedure*

8. **Within 4 hours after collection**, centrifuge EDTA plasma collection tubes at approximately 2500 x g for 15 minutes, at approximately 4°C in a refrigerated centrifuge equipped with a swing-bucket rotor.
9. Remove the collection tube cap carefully to avoid disturbing the pellet or causing splashing of the blood. **The plasma samples should not contain red blood cells** (due to either a pipetting error (aspiration of the blood clot) or perturbation of the blood clot). Care should be taken to avoid haemolysis of the sample.
10. Using a pipette with appropriate filter tip, plasma is carefully transferred to a 15mL centrifuge tube, recapped and inverted 5-10 times to create a uniform sample.
11. A pipette with appropriate filter tip should be used to transfer four 0.5mL aliquots of plasma into supplied cryotubes and two 0.5mL aliquots into the glass vials containing methanol.

---

*APPROACH Clinical study protocol- Final version V1.0\_NL*

---

12. Barcode labels are applied to sample aliquot tubes in a vertical orientation (shown below) to ensure compatibility with the barcode reader.

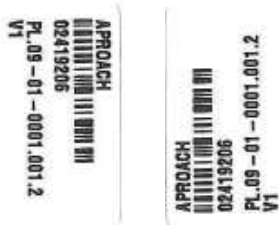

OR

13. Freeze and store the cryotubes immediately at -70°C to -80°C using the same cryobox filling recommendations shown for serum.

### Blood DNA Sample Processing

#### Materials for DNA PAXgene only cryostorage (total/study)

- 10 (10x10) cryoboxes labelled specifically for distribution to Genomic/Epigenetic testing site (AbbVie)

#### *Procedure*

1. **Within 4 hours after collection** store the PAXgene Blood DNA Tube upright at -20°C from 0.5-72 hours prior to transfer into long term storage at -70°C to -80°C using the same recommendations as for cryotubes for serum.

**Guidelines for Freezing PAXgene Blood DNA Tubes Containing Blood Samples.** To freeze PAXgene Blood DNA Tubes, stand them upright in a metal or plastic wire rack. **Do not freeze tubes upright in a Styrofoam™ tray as this may cause the tubes to crack.**

### Blood RNA Sample Processing

#### Materials for RNA PAXgene only cryostorage (total/study)

- 10 (10x10) cryoboxes labelled specifically for distribution to Transcriptomic testing site (AbbVie)

#### *Procedure*

1. **Within 4 hours after collection** store the PAXgene Blood RNA Tube upright at room temperature (18-25°C) for 2-72 hours prior to transfer to -70°C to -80°C freezer for long term storage using the same recommendations as for cryotubes for serum.

### Urine Sample Processing

#### Materials for Urine (Per Subject, per time point):

- 1 x 15 mL sterile conical centrifuge tube
- 1 x 10 mL sterile barcode labelled cryotube

---

*APPROACH Clinical study protocol- Final version V1.0\_NL*

---

**Materials for Urine only cryostorage (total/study)**

- 20 (10x10) cryoboxes labelled specifically for distribution to storage site (BST)

***Procedure***

1. Within four hours of collection, samples (~15mL) are transferred to a sterile conical centrifuge tube and placed on ice until centrifugation.
2. Tubes are spun at 1,500 × g for 10 minutes at approximately 4°C in a refrigerated centrifuge equipped with a swing-bucket rotor to pellet any cells.
3. 10mL of centrifuged urine sample is transferred to a sterile cryotube using sterile pipette.
4. Barcode labels are applied to sample aliquot tubes in a vertical orientation (shown below) to ensure compatibility with the barcode reader.

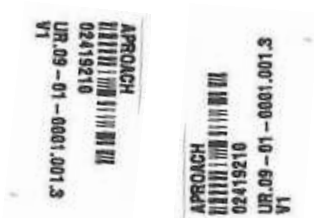

OR

5. All processed samples are transferred to a -70°C to -80°C freezer within two hours of collection using the same recommendations than for cryotubes for serum.



## APPROACH Clinical study protocol- Final version V1.0\_NL

## APPROACH Sample Collection and Processing Flow Charts

## APPROACH Visit 1

|                            | <u>Serum</u>            | <u>Plasma</u>                                  | <u>DNA</u>     | <u>RNA</u>     | <u>Urine</u>               |                   |
|----------------------------|-------------------------|------------------------------------------------|----------------|----------------|----------------------------|-------------------|
| Draw                       | 3 x 7mL                 | 1 x 7mL                                        | 1 x 8.5mL      | 1 x 2.5mL      | 1 x 50mL                   | <b>Collection</b> |
| Primary tube               | SST                     | EDTA                                           | PAXgene DNA    | PAXgene RNA    | Urine collection container |                   |
| Mixing                     | Invert (5x)             | Invert (8-10x)                                 | Invert (8-10x) | Invert (8-10x) |                            |                   |
| Handling                   | up to 4hr @ RT          | up to 4hr on ice                               | up to 4hr @ RT | up to 4hr @ RT | up to 4hr on ice           |                   |
| Pre centrifuge             |                         |                                                |                |                | 12-15 mL into 15mL conical | <b>Processing</b> |
| Centrifugation             | 2500xg @ 4°C            | 2500xg @ 4°C                                   |                |                | 1500xg @ 4°C               |                   |
| Post centrifuge            | on ice                  | on ice                                         |                |                |                            |                   |
| Sample Pool                | 3 samples to 1          |                                                |                |                |                            |                   |
| Pooling tube               | 15ml conical            |                                                |                |                |                            |                   |
| Mixing                     | Invert (5x)             |                                                |                |                |                            |                   |
| Aliquotting                | on ice                  | on ice                                         |                |                | on ice                     |                   |
| Aliquots                   | 13 x 0.5mL<br>1 x 5.0mL | 6 x 0.5mL                                      |                |                | 1 x 10mL                   |                   |
| Aliquot vials              | Cryotubes               | 4 x 0.5 mL cryotubes<br>2 x 0.5 mL galss vials |                |                | Cryotube                   |                   |
| Short-term (ST) Storage    |                         |                                                | 0.5-72 hrs     | 2-72 hrs       |                            |                   |
| ST Storage Temperature     |                         |                                                | -20°C          | RT (18-25°C)   |                            |                   |
| Final on-site Storage Temp | -70 to -80°C            | -70 to -80°C                                   | -70 to -80°C   | -70 to -80°C   | -70 to -80°C               |                   |
| Storage box                | Cryoboxes               | Cryoboxes                                      | Cryoboxes      | Cryoboxes      | Cryoboxes                  |                   |

APPROACH Clinical study protocol- Final version V1.0\_NL

APPROACH Sample Collection and Processing Flow Charts

APPROACH Visits 2 & 3

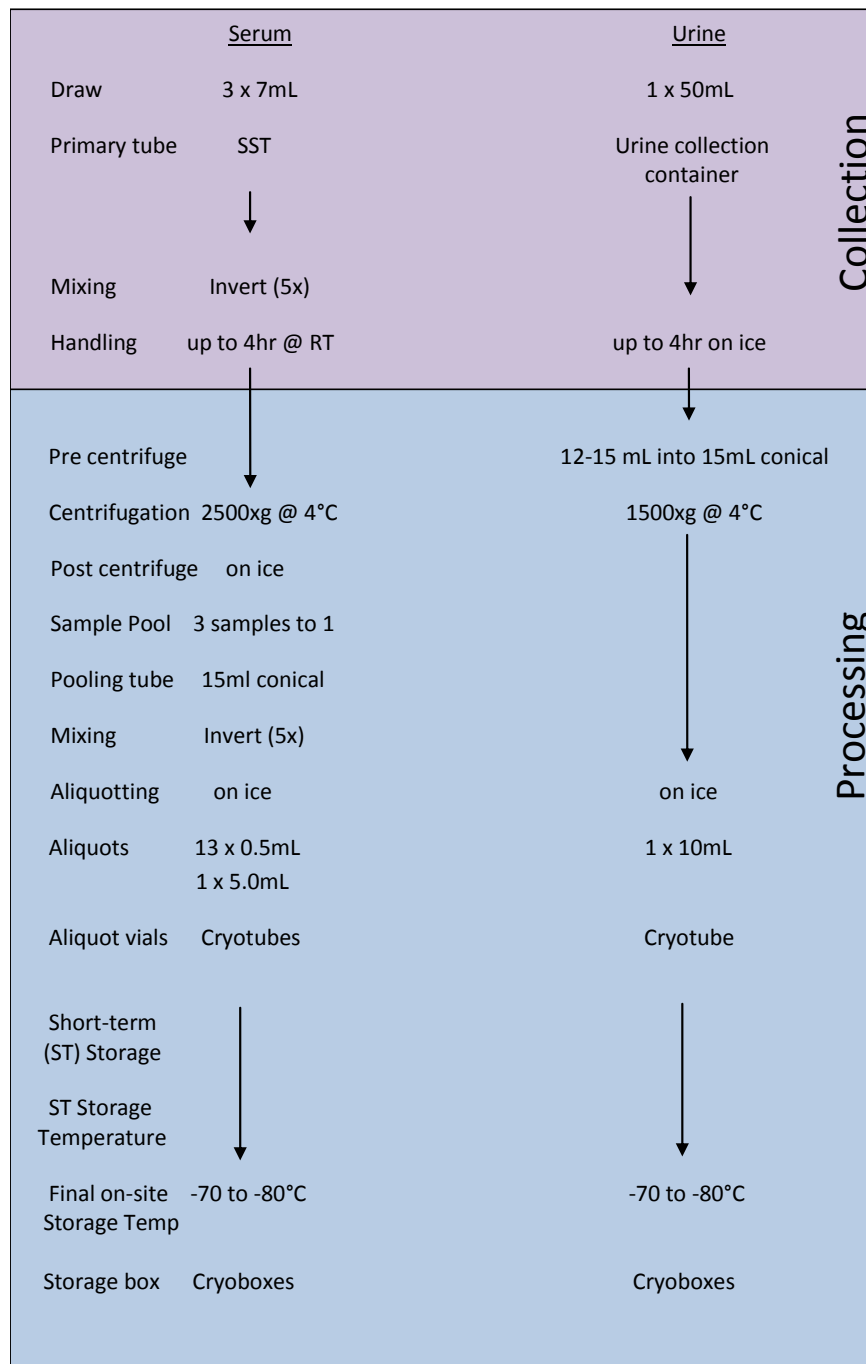

APPROACH Clinical study protocol- Final version V1.0\_NL

APPROACH Sample Collection and Processing Flow Charts

APPROACH Visit 4

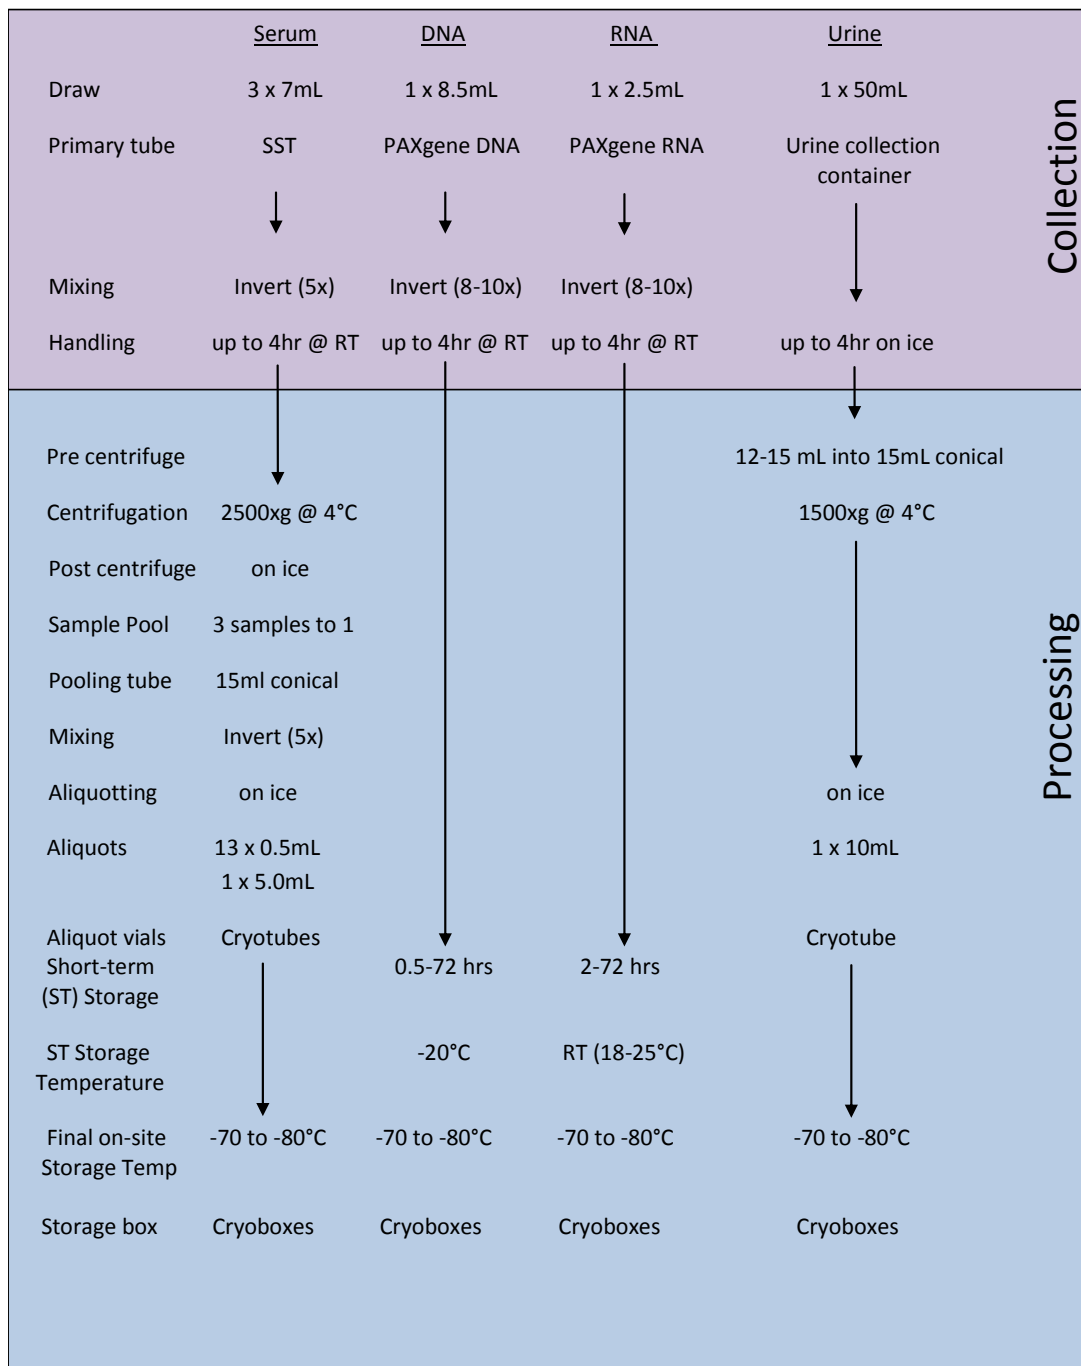

## SOP 10.3: Storage, Tracking and Distribution of Samples at Clinical Centres

Clinical trial protocol  
Study number: APPROACH-OA-P01

6 January 2017  
Version number: 1.0

### SOP 10.3: Storage, Tracking and Distribution of Samples at Clinical Centres

V1.0 d.d. 23-08-2016

#### Graphical study design

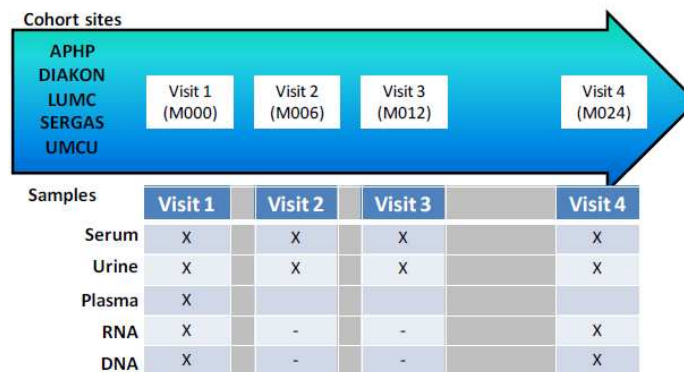

## APPROACH Clinical study protocol- Final version V1.0\_NL

Clinical trial protocol  
Study number : APPROACH-OA-P01

6 January 2017  
Version number: 1.0

## Study flow chart for sampling

| Phase                                    |                         | Study Period      |           |           |            |
|------------------------------------------|-------------------------|-------------------|-----------|-----------|------------|
| Visit at clinical site                   |                         | 1                 | 2         | 3         | 4          |
| Month                                    |                         | M0                | M6        | M12       | M24        |
| Sample collection for biomarker assay(s) | Collection Tube         | Total Sample draw |           |           |            |
| Serum:                                   | SST                     | X<br>21ml         | X<br>21ml | X<br>21ml | X<br>21ml  |
| Urine :                                  | Urine                   | X<br>10ml         | X<br>10ml | X<br>10ml | X<br>10ml  |
| DNA :                                    | PAXgene<br>blood<br>DNA | X<br>8.5mL        |           |           | X<br>8.5mL |
| RNA :                                    | PAXgene<br>blood<br>RNA | X<br>2.5mL        |           |           | X<br>2.5mL |
| Plasma :                                 | EDTA                    | X<br>7mL          |           |           |            |

## Aliquots per visit

Serum (V1-4) 12 x 0.5mL + 1 x 5.0mL = 11.0 mL Total Serum Vol

Urine (V1-4) 1 x 10 mL = 10.0 mL Total Urine Vol

Plasma (V1) 6 x 1.0mL = 6.0 mL Total Plasma Vol

RNA (V1&4) 1 x 2.5 mL = 2.5 mL Total Blood Draw Req'd into PAXgene blood RNA tubes

DNA (V1&4) 1 x 8.5 mL = 8.5 mL Total Blood Draw Req'd into PAXgene blood DNA tubes

## APPROACH Clinical study protocol- Final version V1.0\_NL

Clinical trial protocol  
Study number : APPROACH-OA-P01

6 January 2017  
Version number: 1.0

## Sample collection logging and cross referencing to eCRF

Site-specific sample collection kits will be supplied to each clinical centre (quantity based on expected enrollment/site)

### Contents:

#### Consumables:

- Preprinted barcode labels (1 bag/patient labeled with unique patient number)
  - Each bag contains 4 smaller bags containing necessary barcode labels for each visit
- Pre-labeled cryostorage boxes with aliquot storage and distribution details
- Collection, processing and storage tubes provided in bulk

#### Hardware:

- Barcode reader

#### Sample Tracking Spreadsheet:

- APPROACH WP2 Clinical Centre Excel spreadsheet (Appendix 2)

### *Procedure*

Designation of WP2 unique patient number – Visit 1 (M000) Only

1. Patient number is designated by selecting an unused barcode label bag at enrolment visit (bag is then patient-specific and will contain barcode labels for all subsequent visits).
  - a. To simplify retrieval at subsequent visits Personal Patient info (Name, etc) may be attached to or written on bag at this point. Bags will be discarded at local site at completion of study.
2. Open APPROACH WP2 Clinical Centre Excel spreadsheet 'Patient Info' Tab (below) and click on next open cell in 'SampleID' column (A) and scan barcode label on the internal bag labeled 'inclusion/M000' using the barcode reader – Corresponding barcode number will be added into the cell and other fields are autopopulated in columns B through F.

| 1  | SampleID | Patient Number | Visit (VISIT variable) | Clinical id         | Date of Sampling (LBDT variable) | Time of Sampling (LBTN) | eCRF Patient Number | Fasting Status at collection | Time of Last Meal |
|----|----------|----------------|------------------------|---------------------|----------------------------------|-------------------------|---------------------|------------------------------|-------------------|
| 2  |          |                |                        |                     |                                  |                         |                     |                              |                   |
| 3  | 02419121 | 09-01-0001     | V1                     | SR 09-01-0001 001 1 | 3/24/2017                        | 3:27:21 PM              |                     |                              |                   |
| 4  |          | #N/A           | #N/A                   | #N/A                |                                  |                         |                     |                              |                   |
| 5  |          | #N/A           | #N/A                   | #N/A                |                                  |                         |                     |                              |                   |
| 6  |          | #N/A           | #N/A                   | #N/A                |                                  |                         |                     |                              |                   |
| 7  |          | #N/A           | #N/A                   | #N/A                |                                  |                         |                     |                              |                   |
| 8  |          | #N/A           | #N/A                   | #N/A                |                                  |                         |                     |                              |                   |
| 9  |          | #N/A           | #N/A                   | #N/A                |                                  |                         |                     |                              |                   |
| 10 |          | #N/A           | #N/A                   | #N/A                |                                  |                         |                     |                              |                   |



Clinical trial protocol  
Study number : APPROACH-OA-P01

6 January 2017  
Version number: 1.0

## Sample Logging

1. Navigate to APPROACH WP2 Clinical Centre Excel spreadsheet tab specific for sample type (e.g. Serum, Plasma, Urine, DNA and RNA)
2. Click on uppermost open cell in 'SampleID' column (A) – Take care to confirm that appropriate cell is highlighted

| SampleID | Patient Number | Test (TEST variable) | Clinical ID         | Sample Category | Date of Sampling (LSDT variable) | Time of Sampling (LSTW) | eCRF Patient Number | Laboratory Message (LERRM variable) | Category for Lab Test (LRCAT variable) | Sample integrity collection site | Sample integrity Testing site | Test name (LTEST variable) | Result (Result variable) | Value (Quantity variable) | Unit (LSPU variable) | Lower range (LERRSP LG variable) | Higher range (LERRSP HG variable) | Sample Status (LERRSP MD variable) |
|----------|----------------|----------------------|---------------------|-----------------|----------------------------------|-------------------------|---------------------|-------------------------------------|----------------------------------------|----------------------------------|-------------------------------|----------------------------|--------------------------|---------------------------|----------------------|----------------------------------|-----------------------------------|------------------------------------|
| 02419125 | IS-21-0001     | V1                   | SR-09-01-0001.001.E | SR              | 01/2017                          | 10:00:00 AM             |                     |                                     |                                        |                                  |                               |                            |                          |                           |                      |                                  |                                   |                                    |
|          | #NA            | #NA                  | #NA                 | #NA             | #NA                              | #NA                     |                     |                                     |                                        |                                  |                               |                            |                          |                           |                      |                                  |                                   |                                    |
|          | #NA            | #NA                  | #NA                 | #NA             | #NA                              | #NA                     |                     |                                     |                                        |                                  |                               |                            |                          |                           |                      |                                  |                                   |                                    |
|          | #NA            | #NA                  | #NA                 | #NA             | #NA                              | #NA                     |                     |                                     |                                        |                                  |                               |                            |                          |                           |                      |                                  |                                   |                                    |
|          | #NA            | #NA                  | #NA                 | #NA             | #NA                              | #NA                     |                     |                                     |                                        |                                  |                               |                            |                          |                           |                      |                                  |                                   |                                    |

3. Labeled sample aliquot tubes are scanned one by one from lowest to highest (for example; numbers ending in .5-.18 for serum) using the barcode scanner
  - a. Cells in columns B-G will automatically populate and selected cell in column A will move down one row awaiting the next input
4. Manually enter sample specific information in columns with yellow headers
5. Complete this for each sample type and aliquot on the appropriate tab of the spreadsheet
6. 'Save' updated APPROACH WP2 Clinical Centre Excel spreadsheet into APPROACH database

## Sample Storage for Shipping

1. Place sample aliquots in appropriate cryostorage box for storage/distribution (supplied pre-labeled as demonstrated below).
  - a. SR = Serum, PL = Plasma, UR = Urine, DN = DNA and RN = RNA
  - b. Final number on barcode label (.1-.18, depending on sample type, circled in example below) designates aliquot number and destination storage box

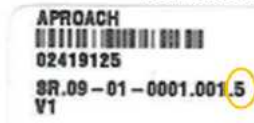



## APPROACH Clinical study protocol- Final version V1.0\_NL

Clinical trial protocol  
Study number : APPROACH-OA-P01

6 January 2017  
Version number: 1.0

## Sample Testing/Storage Site Information

| Distribution Site | Analysis                                   | Sample Type(s)        | Sampling Visits  | Aliquots (per visit) | Aliquot Volume (mL)           | Subjects | Total Visits (per subject) | Total Tubes                    | # of (10x10) cryoboxes  | Aliquot #s (from barcode label) |
|-------------------|--------------------------------------------|-----------------------|------------------|----------------------|-------------------------------|----------|----------------------------|--------------------------------|-------------------------|---------------------------------|
| Nordic Bioscience | Biomarker                                  | Serum                 | M000-M024        | 5                    | 0.5                           | 300      | 4                          | 10000                          | 100                     | SR .5-.9                        |
| Artialis          | Biomarker                                  | Serum                 | M000-M024        | 3                    | 0.5                           | 300      | 4                          | 6000                           | 60                      | SR .10-.12                      |
| Lund              | Biomarker                                  | Serum                 | M000-M024        | 3                    | 0.5                           | 300      | 4                          | 6000                           | 60                      | SR .13-.15                      |
| Surrey            | Metabolomics                               | Plasma                | M000             | 2                    | 0.5                           | 300      | 1                          | 1000                           | 10                      | PL .2-.3                        |
| Sergas            | Proteomics                                 | Plasma                | M000             | 2                    | 0.5                           | 300      | 1                          | 1000                           | 10                      | PL .4-.5                        |
| LUMC              | Lipidomics                                 | Plasma                | M000             | 2                    | 0.5                           | 300      | 1                          | 1000                           | 10                      | PL .6-.7                        |
| AbbVie            | Transcriptomics<br>Genomics<br>Epigenetics | DNA<br>and<br>RNA     | M000 and<br>M024 | 1 DNA<br>1 RNA       | 8.5<br>DNA<br>2.5<br>RNA      | 300      | 2                          | 1000<br>DNA<br>1000<br>RNA     | 10 DNA<br>10 RNA        | DN .1<br>RN .1                  |
| BST               | Short Term Storage                         | Serum                 | M000-M024        | 2                    | 0.5                           | 300      | 4                          | 4000                           | 40                      | SR .16-.17                      |
| BST               | Long Term Storage                          | Serum<br>and<br>Urine | M000-M024        | 1 Serum<br>1 Urine   | 5.0<br>Serum<br>10.0<br>Urine | 300      | 4                          | 2000<br>Serum<br>2000<br>Urine | 20<br>Serum<br>20 Urine | SR .18<br>UR .3                 |

- The cryotubes should be placed into the appropriate Distribution site labelled cryoboxes (see label examples below) based on the appropriate aliquot # (see Aliquot #s column above).

Clinical trial protocol  
Study number : APPROACH-OA-P01

6 January 2017  
Version number: 1.0

### Cryobox Labels for aliquot distribution:

#### Serum Aliquots

APPROACH SERUM Aliquots (0.5mL)  
Include SR tubes ending in: .5, .6, .7, .8  
and .9

Shipment to: Nordic Bioscience

APPROACH SERUM Aliquots (0.5mL)  
Include SR tubes ending in: .13, .14 and  
.15

Shipment to: Lund

APPROACH SERUM Aliquots (5mL)  
Include SR tubes ending in: .18

Shipment to: BST

#### Urine Aliquots

APPROACH URINE Aliquots (10mL)  
Include DN tubes ending in .3

Shipment to: BST

#### Plasma Aliquots

APPROACH SERUM Aliquots (0.5mL)

Include SR tubes ending in: .10, .11 and .12

Shipment to: Artialis

APPROACH SERUM Aliquots (0.5mL)

Include SR tubes ending in: .16 and .17

Shipment to: BST

---

*APPROACH Clinical study protocol- Final version V1.0\_NL*

---

Clinical trial protocol  
Study number : APPROACH-OA-P01

6 January 2017  
Version number: 1.0

**APPROACH PLASMA Aliquots (0.5mL)**

Include PL tubes ending in .2 and .3

Shipment to: LUMC

**APPROACH PLASMA Aliquots (0.5mL)**

Include PL tubes ending in: .4 and .5

Shipment to: Surrey

**APPROACH PLASMA Aliquots (0.5mL)**

Include PL tubes ending in: .6 and .7

Shipment to: Sergas

**DNA Samples**

APPROACH DNA Samples

Include DN tubes ending in .1

Shipment to: AbbVie

**RNA Samples**

APPROACH RNA Samples

Include RN tubes ending in .1

Shipment to: AbbVie

3. The cryobox should be filled from the left hand corner (A1) with aliquots being filled left to right top to bottom.

Clinical trial protocol  
Study number : APPROACH-OA-P01

6 January 2017  
Version number: 1.0

|   | 1 | 2 | 3 | 4 | 5 | 6 | 7 | 8 | 9 | 10 |
|---|---|---|---|---|---|---|---|---|---|----|
| A |   |   |   |   |   |   |   |   |   |    |
| B |   |   |   |   |   |   |   |   |   |    |
| C |   |   |   |   |   |   |   |   |   |    |
| D |   |   |   |   |   |   |   |   |   |    |
| E |   |   |   |   |   |   |   |   |   |    |
| F |   |   |   |   |   |   |   |   |   |    |
| G |   |   |   |   |   |   |   |   |   |    |
| H |   |   |   |   |   |   |   |   |   |    |
| I |   |   |   |   |   |   |   |   |   |    |
| J |   |   |   |   |   |   |   |   |   |    |

4. The cryobox is placed immediately into  $-70^{\circ}\text{C}$  to  $-80^{\circ}\text{C}$  freezer for storage until distribution.
  - a. New aliquots may be placed into a partially filled box.
  - b. This should be done such that the thawing effect on the samples already frozen is minimised.
  - c. Samples should never reach a temperature of  $\geq -20^{\circ}\text{C}$ .
  
5. Samples are stored locally for distribution to testing facilities every 6 months, or as warranted by local freezer capacity at clinical centres.

## Shipment Procedures

Every 6 months, or as warranted, stored samples may be shipped in bulk to the testing facilities by contacting local BioCair representative listed below for each Clinical Centre:

UMCU – Utrecht, The Netherlands

APHP – Paris, France

LUMC – Leiden, The Netherlands

DIAKON – Oslo, Norway

Clinical trial protocol  
Study number : APPROACH-OA-P01

6 January 2017  
Version number: 1.0

SERGAS – Coruna, Spain

### **Shipment Assembly**

1. Sample filled cryostorage boxes are individually secured to ensure maintained closure during shipping (rubber band)
2. Cryostorage boxes specific for each testing site are stacked upright into a plastic bag and closure is secured with a zip-tie.

#### Addresses for testing sites:

- Nordic Bioscience A/S  
Herlev Hovedgade 205-207  
2730 Herlev  
Denmark  
Attn:  
Tel: +45 4452 5252  
Fax: +45 4452 5251
- Artialis  
11, Avenue de l'Hôpital  
Tour GIGA +3  
4000 Liège (Sart-Tilman)  
Belgium  
Attn:  
Tel. +32 4 242 77 27  
Fax +32 4 242 77 28
- Lund University  
Department of Rheumatology  
Kioskgatan 3, SUS  
222 42 Lund, Sweden  
Attn: Patrik Önnerfjord

---

*APPROACH Clinical study protocol- Final version V1.0\_NL*

---

Clinical trial protocol  
Study number : APPROACH-OA-P01

6 January 2017  
Version number: 1.0

Tel: +46 46 2223129

Fax:

- LUMC  
Department of Rheumatology, Leiden University Medical Center  
C1-38, Leiden, The Netherlands  
Attn: Andreea Ioan-Facsinay  
Tel: +31 71 526 6868  
Fax: +31 71 526 6752
- Surrey  
16DK03, Duke of Kent Building, University of Surrey  
Guildford, Surrey, GU2 7XH,  
United Kingdom  
Attn: Ali Mobasheri  
Tel: +44 (0) 1483 682536  
Fax:
- Sergas  
Proteomics Platform INIBIC-CHUAC  
Hospital Teresa Herrera (Annex Building - 2nd floor)  
Xubias de Arriba, 84  
15006 A Coruña  
Spain  
Attn:  
Tel:  
Fax:
- AbbVie

Property of APPROACH-OA - strictly confidential

Page 11

---

UMC Utrecht – dd 25-08-2017 (date of issue of protocol) - Confidential

---

*APPROACH Clinical study protocol- Final version V1.0\_NL*

Clinical trial protocol  
Study number : APPROACH-OA-P01

6 January 2017  
Version number: 1.0

- BioStorage Technologies (BST)  
BioStorage Technologies European Operation  
Im Leuschnerpark 1B  
64347 Griesheim  
Germany  
Attn:  
Tel: +49 6922 221 2291  
Fax: +49 6155 898 1090

## APPROACH Clinical study protocol- Final version V1.0\_NL

Clinical trial protocol  
Study number : APPROACH-OA-P01

6 January 2017  
Version number: 1.0

**Study APPROACH**  
Individual Shipment Form

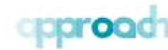

From: Centre test Adresse test 92100

To:

| Date of shipment | Day | Month | Year | Time |
|------------------|-----|-------|------|------|
|                  | /// | ///   | //// |      |

| Sample Type | Number of Cryoboxes | Number of Sample Tubes | Reception: OK/NOT OK | If NOT OK, Issue | Monitoring Date | Comments |
|-------------|---------------------|------------------------|----------------------|------------------|-----------------|----------|
| Serum       | 6                   | 600                    |                      |                  |                 |          |
|             |                     |                        |                      |                  |                 |          |
|             |                     |                        |                      |                  |                 |          |
|             |                     |                        |                      |                  |                 |          |

Acknowledgement at reception: Date / / Time :

Name:

Signature:

At Reception please fax this form to



*APPROACH Clinical study protocol- Final version V1.0\_NL*

Clinical trial protocol  
Study number : APPROACH-OA-P01

6 January 2017  
Version number: 1.0

**Contacts**

For Collection and Labeling kits:

For Distribution/Shipping:

**Appendix 1: Barcode label information****Patient ID**

- Study protocol: APPROACH-OA-P01
  - Patient ID : OA-P01-AA-BB-CCCC
- Example for site 1 (UMCU, first patient): OA-P01-02-01-0001
- ✓ Disease code : OA
  - ✓ Protocol: P01
  - ✓ APPROACH Participant Number: 02 (UMCU)
  - ✓ Site number : 01
  - ✓ Patient Number :from 0001

**Clinical Centre Details**

| Study protocol (APPROACH-OA-P01)         | Participant number (AA) | Site number (BB) | Patient ID (OA-P01-AA-BB-CCCC)                                      |
|------------------------------------------|-------------------------|------------------|---------------------------------------------------------------------|
| University Medical Center Utrecht (UMCU) | 02                      | Starting from 01 | For site 1 for UMCU, patient ID starting from<br>OA-P01-02-01- 0001 |

  

| Site number/Patient ID | PI | Address of Rheumatology department | Town |
|------------------------|----|------------------------------------|------|
|                        |    |                                    |      |

Property of APPROACH-OA - strictly confidential

Page 14

UMC Utrecht – dd 25-08-2017 (date of issue of protocol) - Confidential

*APPROACH Clinical study protocol- Final version V1.0\_NL*

Clinical trial protocol  
Study number : APPROACH-OA-P01

6 January 2017  
Version number: 1.0

|                        |                          |  |         |
|------------------------|--------------------------|--|---------|
| 01 / OA-P01-02-01-0001 | Prof. Dr. Floris Lafeber |  | Utrecht |
|------------------------|--------------------------|--|---------|

| Study protocol (APPROACH-OA-P01)       | Participant number (AA)        | Site number (BB)                                                         | Patient ID (OA-P01-AA-BB-CCCC)                                      |
|----------------------------------------|--------------------------------|--------------------------------------------------------------------------|---------------------------------------------------------------------|
| Leids University Medical Center (LUMC) | 14                             | Starting from 01                                                         | For site 1 for LUMC, patient ID starting from<br>OA-P01-14-01- 0001 |
| Site number/Patient ID                 | PI                             | Address of Rheumatology department                                       | Town                                                                |
| 01 / OA-P01-14-01-0001                 | Prof. Dr. Margreet Kloppenburg | Leids University Medical Center (LUMC)<br>Albinusdreef 2, 2333 ZA Leiden | Leiden                                                              |

| Study protocol (APPROACH-OA-P01)    | Participant number (AA)     | Site number (BB)                   | Patient ID (OA-P01-AA-BB-CCCC)                                      |
|-------------------------------------|-----------------------------|------------------------------------|---------------------------------------------------------------------|
| AP-HP Saint-Antoine hospital (APHP) | 18                          | Starting from 01                   | For site 1 for APHP, patient ID starting from<br>OA-P01-18-01- 0001 |
| Site number/Patient ID              | PI                          | Address of Rheumatology department | Town                                                                |
| 01 / OA-P01-18-01-0001              | Prof. Dr. Francis Berenbaum |                                    | Paris                                                               |

| Study protocol (APPROACH-OA-P01) | Participant number | Site number (BB) | Patient ID (OA-P01-AA-BB-CCCC) |
|----------------------------------|--------------------|------------------|--------------------------------|
|                                  |                    |                  |                                |

Property of APPROACH-OA - strictly confidential

Page 15

UMC Utrecht – dd 25-08-2017 (date of issue of protocol) - Confidential

## APPROACH Clinical study protocol- Final version V1.0\_NL

Clinical trial protocol  
Study number : APPROACH-OA-P01

6 January 2017  
Version number: 1.0

|                                  | (AA)                   |                      |                                                                       |
|----------------------------------|------------------------|----------------------|-----------------------------------------------------------------------|
| Servizo Galego de Saúde (SERGAS) | 17                     | Starting from 01     | For site 1 for SERGAS, patient ID starting from<br>OA-P01-17-01- 0001 |
|                                  | Site number/Patient ID | PI                   | Address of Rheumatology department                                    |
|                                  | 01 / OA-P01-17-01-0001 | Dr. Francisco Blanco | Coruna                                                                |

  

| Study protocol (APROACH-OA-P01)    | Participant number (AA) | Site number (BB) | Patient ID (OA-P01-AA-BB-CCCC)                                        |
|------------------------------------|-------------------------|------------------|-----------------------------------------------------------------------|
| Diakonhjemmet Hospital AS (DIAKON) | 19                      | Starting from 01 | For site 1 for DIAKON, patient ID starting from<br>OA-P01-19-01- 0001 |
|                                    | Site number/Patient ID  | PI               | Address of Rheumatology department                                    |
|                                    | 01 / OA-P01-19-01-0001  | Dr. Ida Haugen   | Oslo                                                                  |

---

*APPROACH Clinical study protocol- Final version V1.0\_NL*Clinical trial protocol  
Study number : APPROACH-OA-P016 January 2017  
Version number: 1.0**Tubes and labelling**

| Test | Visits | Blood volume to collect | Collection tubes | Mix by inversion | Clotting | centrifugation | Pooling | Transfer to sample aliquot | Storage and shipment |  Labels to be used : see example |
|------|--------|-------------------------|------------------|------------------|----------|----------------|---------|----------------------------|----------------------|---------------------------------------------------------------------------------------------------------------------|
|------|--------|-------------------------|------------------|------------------|----------|----------------|---------|----------------------------|----------------------|---------------------------------------------------------------------------------------------------------------------|

## APPROACH Clinical study protocol- Final version V1.0\_NL

Clinical trial protocol  
Study number : APPROACH-OA-P016 January 2017  
Version number: 1.0

| Test         | Visits            | Blood volume to collect | Collection tubes               | Mix by inversion | Clotting                   | centrifugation              | Pooling                                                                                                                      | Transfer to sample aliquot                                                                                               | Storage and shipment                                                                                                                                      |  Labels to be used : see example                                                                                                                                                                                                                                                                                                                                                                              |
|--------------|-------------------|-------------------------|--------------------------------|------------------|----------------------------|-----------------------------|------------------------------------------------------------------------------------------------------------------------------|--------------------------------------------------------------------------------------------------------------------------|-----------------------------------------------------------------------------------------------------------------------------------------------------------|--------------------------------------------------------------------------------------------------------------------------------------------------------------------------------------------------------------------------------------------------------------------------------------------------------------------------------------------------------------------------------------------------------------------------------------------------------------------------------------------------|
| <b>Serum</b> | V1, V2, V3 and V4 | 21 mL                   | 3 X 8 mL Serum separator Tubes | 4-6 times        | 30 min at room temperature | 1500 to 2000 rpm for 15 min | <b>1 X 15mL pooling tube</b><br>Pool serum from collection tubes into pooling tube and mix by inversion (5x) for aliquotting | <b>16 X 2mL</b> cryotubes containing at least 0.5mL of serum<br><b>1 X 5mL</b> cryotube containing at least 5mL of serum | Transfer sample tubes to appropriate labeled cryoboxes for storage at -70°C to -80°C.<br>Shipping of cryoboxes to testing centres to occur every 6 months | <b>Blood Collection Tubes:</b><br><br><b>Pooling Tube:</b><br><br><b>Storage Tubes: for analysis Serum (0.5mL)</b><br><br><b>Serum (5.0mL)</b><br> |

Property of APPROACH-OA - strictly confidential

Page 18

UMC Utrecht – dd 25-08-2017 (date of issue of protocol) - Confidential

## APPROACH Clinical study protocol- Final version V1.0\_NL

Clinical trial protocol  
Study number : APPROACH-OA-P016 January 2017  
Version number: 1.0

| Test  | Visits            | Urine volume to collect | Collection tubes                                    | Transfer to centrifuge tube                 | Centrifugation              | Transfer to sample aliquot                          |  Labels to be used : (see example <sup>o</sup> )                                                                                                                                                    |
|-------|-------------------|-------------------------|-----------------------------------------------------|---------------------------------------------|-----------------------------|-----------------------------------------------------|----------------------------------------------------------------------------------------------------------------------------------------------------------------------------------------------------------------------------------------------------------------------------------------|
| Urine | V1, V2, V3 and V4 | <50mL                   | 1 × 50mL sterile primary urine collection container | 12-15 mL of urine into 15mL centrifuge tube | 1500 to 2000 rpm for 15 min | 1 × 10mL cryotube containing at least 10mL of urine | <p><u>Urine Collection Tube</u></p> <p>APPROACH<br/>02419217<br/>UR.09-01-0001.004.1<br/>V4</p> <p><u>Urine Centrifuge Tube</u></p> <p>APPROACH<br/>02419218<br/>UR.09-01-0001.004.2<br/>V4</p> <p><u>Storage tube</u></p> <p>APPROACH<br/>02419219<br/>UR.09-01-0001.004.3<br/>V4</p> |

## APPROACH Clinical study protocol- Final version V1.0\_NL

Clinical trial protocol  
Study number : APPROACH-OA-P016 January 2017  
Version number: 1.0

| Test   | Visits    | Blood volume to collect | Collection tubes                      | Mix by inversion | Handling                                                                                     | Centrifugation              | Transfer to sample aliquot                                                                                                                                             | Storage and shipment                                                                                                                                      |  Labels to be used : (see example))                                                                                                                                                                                                                                             |
|--------|-----------|-------------------------|---------------------------------------|------------------|----------------------------------------------------------------------------------------------|-----------------------------|------------------------------------------------------------------------------------------------------------------------------------------------------------------------|-----------------------------------------------------------------------------------------------------------------------------------------------------------|--------------------------------------------------------------------------------------------------------------------------------------------------------------------------------------------------------------------------------------------------------------------------------------------------------------------------------------------------------------------|
| RNA    | V1 and V4 | 2.5 mL                  | 1 X 2.5 mL PAXgene blood RNA tube     | 8-10 times       | Tubes stored in upright position at room temperature for 2-72 hrs prior to transfer to minus |                             |                                                                                                                                                                        | Transfer sample tubes to appropriate labeled cryoboxes for storage at -70°C to -80°C.<br>Shipping of cryoboxes to testing centres to occur every 6 months | <b>Tube containing RNA</b><br><br>APPROACH<br><br>02419117<br>RN.09 – 01 – 0001.001.1<br>V1                                                                                                                                                                                     |
| DNA    | V1 and V4 | 5 mL                    | 1 X 8.5 mL PAXgene blood DNA tube     | 8-10 times       | Tubes need to be in upright position at minus 20°C for 16-72 hrs                             |                             |                                                                                                                                                                        | Transfer sample tubes to appropriate labeled cryoboxes for storage at -70°C to -80°C.<br>Shipping of cryoboxes to testing centres to occur every 6 months | <b>Tube containing DNA</b><br><br>APPROACH<br><br>02419113<br>DN.09 – 01 – 0001.001.1<br>V1                                                                                                                                                                                     |
| Plasma | V1        | 7 mL                    | 1 X 8.0 mL EDTA blood collection tube | 8-10 times       | 0.5-1hour on ice                                                                             | 1500 to 2000 rpm for 15 min | 4 X 2 mL cryostorage tubes containing at least 0.5 mL of plasma<br>2 x 2mL glass cryostorage tubes prefilled with 0.5 mL Methanol containing at least 0.5 mL of plasma | Transfer sample tubes to appropriate labeled cryoboxes for storage at -70°C to -80°C.<br>Shipping of cryoboxes to testing centres to occur every 6 months | <b>Plasma Collection Tube</b><br><br>APPROACH<br><br>02419205<br>PL.09 – 01 – 0001.001.1<br>V1<br><br><b>Storage tube</b><br><br>APPROACH<br><br>02419206<br>PL.09 – 01 – 0001.001.2<br>V1 |

Property of APPROACH-OA - strictly confidential

Page 20

UMC Utrecht – dd 25-08-2017 (date of issue of protocol) - Confidential

## APPROACH Clinical study protocol- Final version V1.0\_NL

Clinical trial protocol  
Study number : APPROACH-OA-P01

6 January 2017  
Version number: 1.0

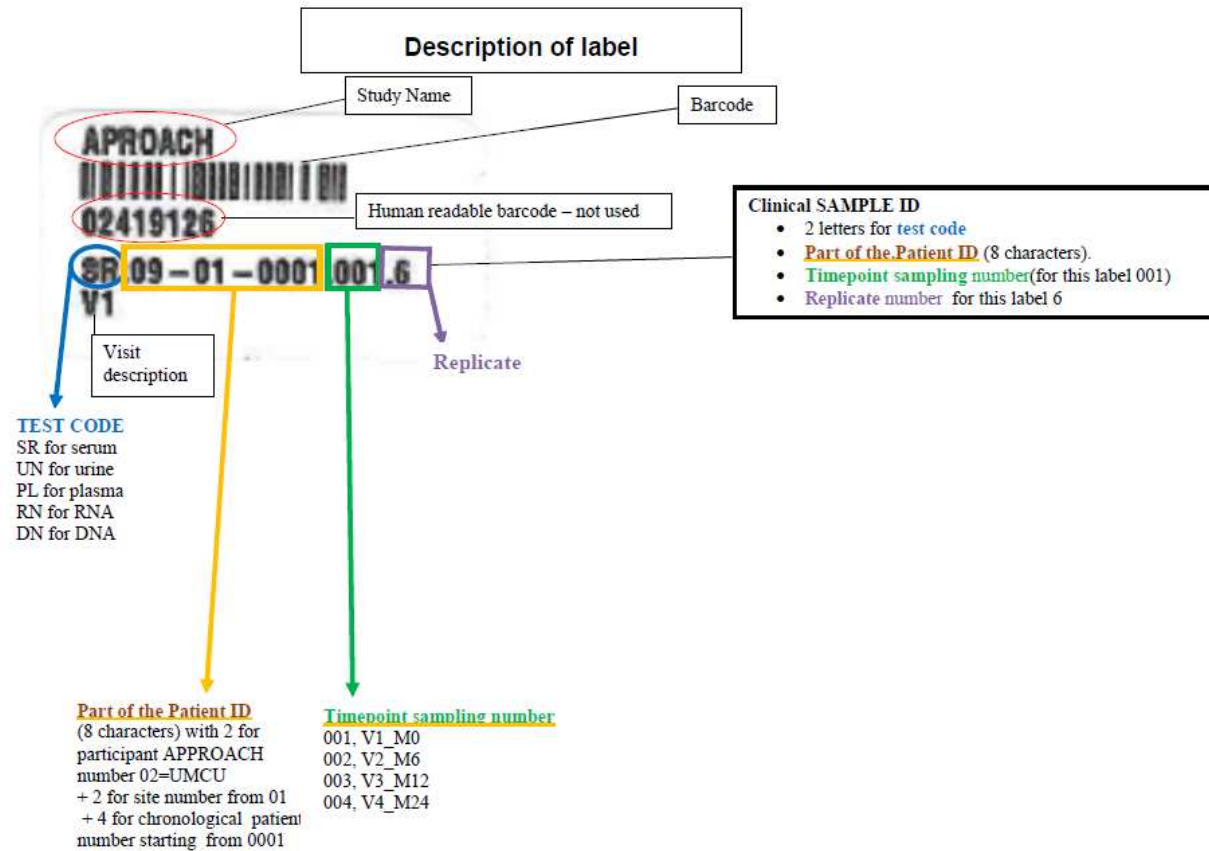

Property of APPROACH-OA - strictly confidential

Page 21

UMC Utrecht – dd 25-08-2017 (date of issue of protocol) - Confidential



Clinical trial protocol  
Study number : APPROACH-OA-P01

6 January 2017  
Version number: 1.0

## Usage of Labels per visit as follows

(see example for site 09-01)

### VISIT V1-M0 (1/5)

SERUM : For collection tubes: 1-3

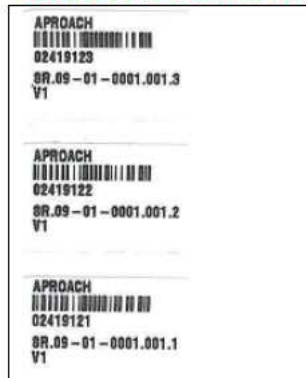

SERUM: For Pooling tube 4

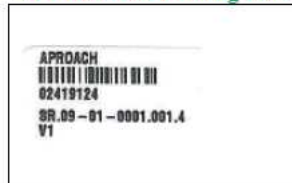

## APPROACH Clinical study protocol- Final version V1.0\_NL

Clinical trial protocol  
Study number : APPROACH-OA-P01

6 January 2017  
Version number: 1.0

## SERUM: For storage tubes from 5 to 18

|                                                                                                                                                |                                                                                                                                                |                                                                                                                                                  |                                                                                                                                                  |
|------------------------------------------------------------------------------------------------------------------------------------------------|------------------------------------------------------------------------------------------------------------------------------------------------|--------------------------------------------------------------------------------------------------------------------------------------------------|--------------------------------------------------------------------------------------------------------------------------------------------------|
| 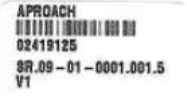 <p>APPROACH<br/>02419125<br/>SR.09-01-0001.001.5<br/>V1</p>  |  <p>APPROACH<br/>02419126<br/>SR.09-01-0001.001.6<br/>V1</p>  |  <p>APPROACH<br/>02419127<br/>SR.09-01-0001.001.7<br/>V1</p>  |  <p>APPROACH<br/>02419128<br/>SR.09-01-0001.001.8<br/>V1</p>  |
|  <p>APPROACH<br/>02419129<br/>SR.09-01-0001.001.9<br/>V1</p>  |  <p>APPROACH<br/>02419130<br/>SR.09-01-0001.001.10<br/>V1</p> |  <p>APPROACH<br/>02419131<br/>SR.09-01-0001.001.11<br/>V1</p> |  <p>APPROACH<br/>02419132<br/>SR.09-01-0001.001.12<br/>V1</p> |
|  <p>APPROACH<br/>02419133<br/>SR.09-01-0001.001.13<br/>V1</p> |  <p>APPROACH<br/>02419134<br/>SR.09-01-0001.001.14<br/>V1</p> |  <p>APPROACH<br/>02419135<br/>SR.09-01-0001.001.15<br/>V1</p> |  <p>APPROACH<br/>02419136<br/>SR.09-01-0001.001.16<br/>V1</p> |
|  <p>APPROACH<br/>02419137<br/>SR.09-01-0001.001.17<br/>V1</p> |  <p>APPROACH<br/>02419138<br/>SR.09-01-0001.001.18<br/>V1</p> |                                                                                                                                                  |                                                                                                                                                  |

Property of APPROACH-OA - strictly confidential

Page 23

UMC Utrecht – dd 25-08-2017 (date of issue of protocol) - Confidential

---

*APPROACH Clinical study protocol- Final version V1.0\_NL*

Clinical trial protocol  
Study number : APPROACH-OA-P01

6 January 2017  
Version number: 1.0

**VISIT V1-M0 (2/5)****URINE : For collection tube 1**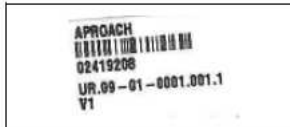**URINE: For centrifuge tube 2**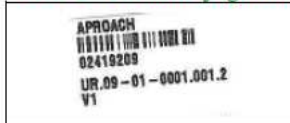**URINE: For storage tube 3**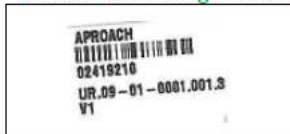

---

*APPROACH Clinical study protocol- Final version V1.0\_NL*

Clinical trial protocol  
Study number : APPROACH-OA-P01

6 January 2017  
Version number: 1.0

**VISIT V1-M0 (3/5)****RNA : For collection tube 1**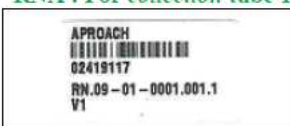**VISIT V1-M0 (4/5)****DNA for collection tube 1**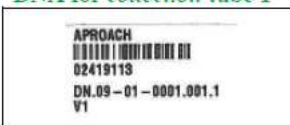**VISIT V1-M0 (5/5)****PLASMA for collection tube 1**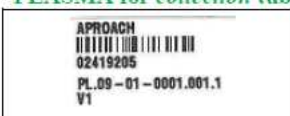**PLASMA for storage tubes 2 to 5 for Proteomic and Metabolomic samples**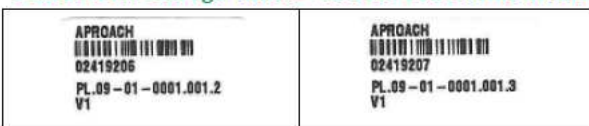

---

Property of APPROACH-OA - strictly confidential

Page 25

UMC Utrecht – dd 25-08-2017 (date of issue of protocol) - Confidential

## APPROACH Clinical study protocol- Final version V1.0\_NL

Clinical trial protocol  
Study number : APPROACH-OA-P01

6 January 2017  
Version number: 1.0

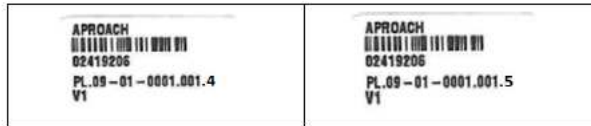

## PLASMA for storage tubes 6 and 7 for Lipidomic samples

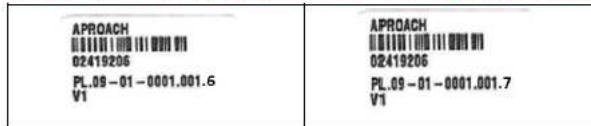

## VISIT V2-M6 (1/2)

## SERUM : For collection tubes: 1-3

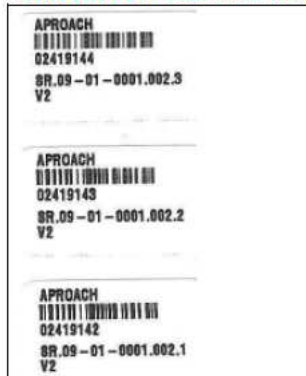

## SERUM: For Pooling tube 4

Property of APPROACH-OA - strictly confidential

Page 26

UMC Utrecht – dd 25-08-2017 (date of issue of protocol) - Confidential

## APPROACH Clinical study protocol- Final version V1.0\_NL

Clinical trial protocol  
Study number : APPROACH-OA-P01

6 January 2017  
Version number: 1.0

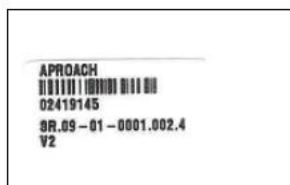

## SERUM: For storage tubes from 5 to 18

|                                                              |                                                              |                                                              |                                                              |
|--------------------------------------------------------------|--------------------------------------------------------------|--------------------------------------------------------------|--------------------------------------------------------------|
| <p>APPROACH<br/>02419146<br/>SR.09-01-0001.002.5<br/>V2</p>  | <p>APPROACH<br/>02419147<br/>SR.09-01-0001.002.6<br/>V2</p>  | <p>APPROACH<br/>02419148<br/>SR.09-01-0001.002.7<br/>V2</p>  | <p>APPROACH<br/>02419149<br/>SR.09-01-0001.002.8<br/>V2</p>  |
| <p>APPROACH<br/>02419150<br/>SR.09-01-0001.002.9<br/>V2</p>  | <p>APPROACH<br/>02419151<br/>SR.09-01-0001.002.10<br/>V2</p> | <p>APPROACH<br/>02419152<br/>SR.09-01-0001.002.11<br/>V2</p> | <p>APPROACH<br/>02419153<br/>SR.09-01-0001.002.12<br/>V2</p> |
| <p>APPROACH<br/>02419154<br/>SR.09-01-0001.002.13<br/>V2</p> | <p>APPROACH<br/>02419155<br/>SR.09-01-0001.002.14<br/>V2</p> | <p>APPROACH<br/>02419156<br/>SR.09-01-0001.002.15<br/>V2</p> | <p>APPROACH<br/>02419157<br/>SR.09-01-0001.002.16<br/>V2</p> |
| <p>APPROACH<br/>02419158<br/>SR.09-01-0001.002.17<br/>V2</p> | <p>APPROACH<br/>02419159<br/>SR.09-01-0001.002.18<br/>V2</p> |                                                              |                                                              |

Property of APPROACH-OA - strictly confidential

Page 27

UMC Utrecht – dd 25-08-2017 (date of issue of protocol) - Confidential

---

*APPROACH Clinical study protocol- Final version V1.0\_NL*

Clinical trial protocol  
Study number : APPROACH-OA-P01

6 January 2017  
Version number: 1.0

**VISIT V2-M6 (2/2)****URINE : For collection tube 1**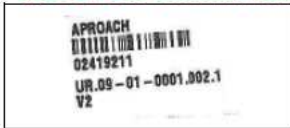**URINE: For centrifuge tube 2**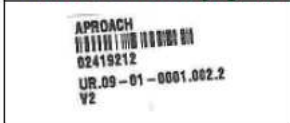**URINE: For storage tube 3**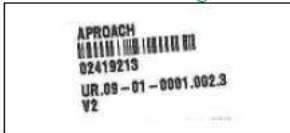

---

*APPROACH Clinical study protocol- Final version V1.0\_NL*

Clinical trial protocol  
Study number : APPROACH-OA-P01

6 January 2017  
Version number: 1.0

**VISIT V3-M12 (1/2)****SERUM: For collection tubes: 1-3**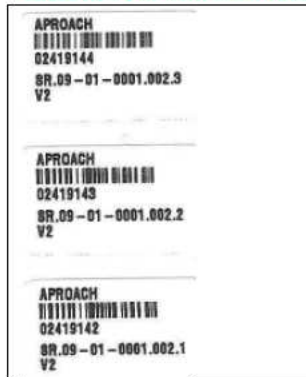**SERUM: For Pooling tube 4**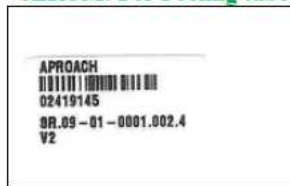

---

Property of APPROACH-OA - strictly confidential

Page 29

UMC Utrecht – dd 25-08-2017 (date of issue of protocol) - Confidential



## APPROACH Clinical study protocol- Final version V1.0\_NL

Clinical trial protocol  
Study number : APPROACH-OA-P01

6 January 2017  
Version number: 1.0

## SERUM: For storage tubes from 5 to 18

|                                                                                                                                         |                                                                                                                                         |                                                                                                                                           |                                                                                                                                           |
|-----------------------------------------------------------------------------------------------------------------------------------------|-----------------------------------------------------------------------------------------------------------------------------------------|-------------------------------------------------------------------------------------------------------------------------------------------|-------------------------------------------------------------------------------------------------------------------------------------------|
| APPROACH<br><br>02419167<br>SR.09-01-0001.003.5<br>VS  | APPROACH<br><br>02419168<br>SR.09-01-0001.003.6<br>VS  | APPROACH<br><br>02419169<br>SR.09-01-0001.003.7<br>VS  | APPROACH<br><br>02419170<br>SR.09-01-0001.003.8<br>VS  |
| APPROACH<br><br>02419171<br>SR.09-01-0001.003.9<br>VS  | APPROACH<br><br>02419172<br>SR.09-01-0001.003.10<br>VS | APPROACH<br><br>02419173<br>SR.09-01-0001.003.11<br>VS | APPROACH<br><br>02419174<br>SR.09-01-0001.003.12<br>VS |
| APPROACH<br><br>02419175<br>SR.09-01-0001.003.13<br>VS | APPROACH<br><br>02419176<br>SR.09-01-0001.003.14<br>VS | APPROACH<br><br>02419177<br>SR.09-01-0001.003.15<br>VS | APPROACH<br><br>02419178<br>SR.09-01-0001.003.16<br>VS |
| APPROACH<br><br>02419179<br>SR.09-01-0001.003.17<br>VS | APPROACH<br><br>02419180<br>SR.09-01-0001.003.18<br>VS |                                                                                                                                           |                                                                                                                                           |

Property of APPROACH-OA - strictly confidential

Page 30

UMC Utrecht – dd 25-08-2017 (date of issue of protocol) - Confidential

---

*APPROACH Clinical study protocol- Final version V1.0\_NL*

Clinical trial protocol  
Study number : APPROACH-OA-P01

6 January 2017  
Version number: 1.0

**VISIT V3-M12 (2/2)****URINE : For collection tube 1**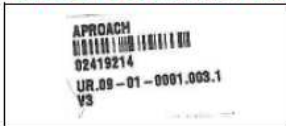**URINE : For centrifuge tube 2**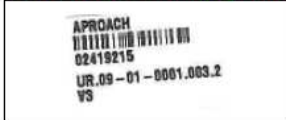**URINE : For storage tube 3**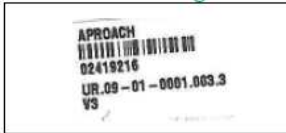

Property of APPROACH-OA - strictly confidential

Page 31

---

UMC Utrecht – dd 25-08-2017 (date of issue of protocol) - Confidential

---

*APPROACH Clinical study protocol- Final version V1.0\_NL*

Clinical trial protocol  
Study number : APPROACH-OA-P01

6 January 2017  
Version number: 1.0

**VISIT V4-M24 (1/4)****SERUM : For collection tubes: 1-3**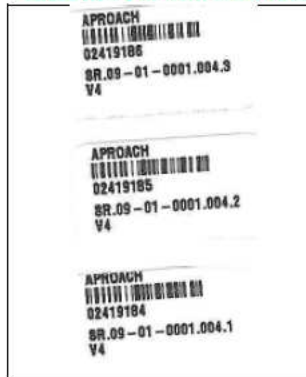**SERUM: For Pooling tube 4**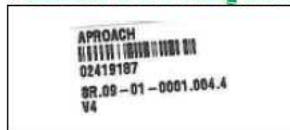

Property of APPROACH-OA - strictly confidential

Page 32

---

UMC Utrecht – dd 25-08-2017 (date of issue of protocol) - Confidential

## APPROACH Clinical study protocol- Final version V1.0\_NL

Clinical trial protocol  
Study number : APPROACH-OA-P01

6 January 2017  
Version number: 1.0

## SERUM: For storage tubes from 5 to 21

|                                                              |                                                              |                                                              |                                                              |
|--------------------------------------------------------------|--------------------------------------------------------------|--------------------------------------------------------------|--------------------------------------------------------------|
| <p>APPROACH<br/>02419188<br/>SR.09-01-0001.004.5<br/>V4</p>  | <p>APPROACH<br/>02419189<br/>SR.09-01-0001.004.6<br/>V4</p>  | <p>APPROACH<br/>02419190<br/>SR.09-01-0001.004.7<br/>V4</p>  | <p>APPROACH<br/>02419191<br/>SR.09-01-0001.004.8<br/>V4</p>  |
| <p>APPROACH<br/>02419192<br/>SR.09-01-0001.004.9<br/>V4</p>  | <p>APPROACH<br/>02419193<br/>SR.09-01-0001.004.10<br/>V4</p> | <p>APPROACH<br/>02419194<br/>SR.09-01-0001.004.11<br/>V4</p> | <p>APPROACH<br/>02419195<br/>SR.09-01-0001.004.12<br/>V4</p> |
| <p>APPROACH<br/>02419196<br/>SR.09-01-0001.004.13<br/>V4</p> | <p>APPROACH<br/>02419197<br/>SR.09-01-0001.004.14<br/>V4</p> | <p>APPROACH<br/>02419198<br/>SR.09-01-0001.004.15<br/>V4</p> | <p>APPROACH<br/>02419199<br/>SR.09-01-0001.004.16<br/>V4</p> |
| <p>APPROACH<br/>02419200<br/>SR.09-01-0001.004.17<br/>V4</p> | <p>APPROACH<br/>02419201<br/>SR.09-01-0001.004.18<br/>V4</p> |                                                              |                                                              |

Property of APPROACH-OA - strictly confidential

Page 33

UMC Utrecht – dd 25-08-2017 (date of issue of protocol) - Confidential

---

*APPROACH Clinical study protocol- Final version V1.0\_NL*

Clinical trial protocol  
Study number : APPROACH-OA-P01

6 January 2017  
Version number: 1.0

**VISIT V4-M24 (2/4)****URINE : For collection tube 1**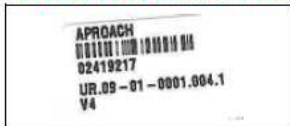**URINE: For centrifuge tube 2**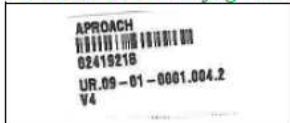**URINE: For storage tube 3**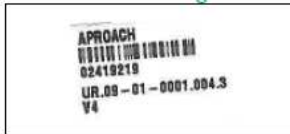

Property of APPROACH-OA - strictly confidential

Page 34

---

UMC Utrecht – dd 25-08-2017 (date of issue of protocol) - Confidential

---

*APPROACH Clinical study protocol- Final version V1.0\_NL*

Clinical trial protocol  
Study number : APPROACH-OA-P01

6 January 2017  
Version number: 1.0

**VISIT V4-M24 (3/4)****RNA : For collection tube 1**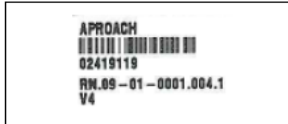**VISIT V4-M24 (4/4)****DNA for collection tube 1**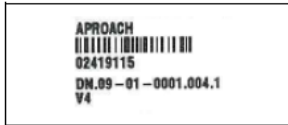**Appendix 2: APPROACH WP2 Clinical Centre Excel Spreadsheet**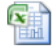

APPROACH WP2  
Clinical Centre Spreac

## SOP 10.4: Logging and Storage of APPROACH Samples at Testing Sites

Clinical trial protocol  
Study number : APPROACH-OA-P01

6 January 2017  
Version number: 1.0

### SOP 10.4: Logging and Storage of APPROACH Samples at Testing Sites

V1.0 d.d. 23-08-2016

#### Sample Logging Kits

Sample logging kits will be supplied to each testing site

##### Contents:

Hardware:

- Barcode reader

Sample Tracking Spreadsheet:

- APPROACH WP2 Testing Site Excel spreadsheet (Specific for each Testing Site – Master Spreadsheet attached in Appendix 1)

#### Sample Receipt and Storage

*Procedure*

1. Upon receipt of sample shipments from clinical centres, complete Reception portions of shipment form that is included in the shipment (Example in Appendix 2) and Fax completed form to:
2. Cryoboxes (example labels shown in Appendix 3) are to be stored in -70°C to -80°C freezer until testing is performed.

#### Sample Logging and Results

1. Upon receipt (or at initiation of testing), sample tubes should be scanned into APPROACH WP2 Testing Site Excel spreadsheet.
  - a. **Note: It is acceptable to use local standard testing site practices, if present, to log, handle and track samples.**
  - b. **However, APPROACH specific data should ultimately be consolidated into the supplied APPROACH WP2 Testing Site Excel spreadsheet described below.**
2. Navigate to APPROACH WP2 Testing Site Excel spreadsheet tab specific for sample type being tested (e.g. Serum, Plasma, Urine, DNA or RNA)
3. Click on uppermost open cell in 'SampleID' column (A) – Take care to confirm that appropriate cell is highlighted

## APPROACH Clinical study protocol- Final version V1.0\_NL

Clinical trial protocol  
Study number : APPROACH-OA-P01

6 January 2017  
Version number: 1.0

| SampleID | Patient Number | Visit<br>(YB1I variable) | Clinical Id         | Sample Category | eCRF Patient Number | Date of Logging<br>(LB1I variable) | Time of Logging<br>(LB1M) | Date of Test<br>(LB1I variable) | Time of Test<br>(LB1M) | Sample integrity<br>Testing site | Test name<br>(LB1TEST variable) |
|----------|----------------|--------------------------|---------------------|-----------------|---------------------|------------------------------------|---------------------------|---------------------------------|------------------------|----------------------------------|---------------------------------|
| 02419125 | 09-21-0001     | V1                       | SR-09-01-0001.001.5 | SR              |                     |                                    |                           |                                 |                        |                                  |                                 |
|          | #N/A           | #N/A                     | #N/A                | #N/A            |                     |                                    |                           |                                 |                        |                                  |                                 |
|          | #N/A           | #N/A                     | #N/A                | #N/A            |                     |                                    |                           |                                 |                        |                                  |                                 |
|          | #N/A           | #N/A                     | #N/A                | #N/A            |                     |                                    |                           |                                 |                        |                                  |                                 |
|          | #N/A           | #N/A                     | #N/A                | #N/A            |                     |                                    |                           |                                 |                        |                                  |                                 |
|          | #N/A           | #N/A                     | #N/A                | #N/A            |                     |                                    |                           |                                 |                        |                                  |                                 |

4. Labeled sample aliquot tubes are scanned one by one from lowest to highest (for example; numbers ending in .5-.18 for serum) using the barcode scanner
  - a. Cells in columns B-E will automatically populate and selected cell in column A will move down one row awaiting the next input
5. Manually enter sample specific information and testing assay results in columns with yellow headers.
6. Complete this for each sample type and aliquot on the appropriate tab of the spreadsheet
7. 'Save' updated APPROACH WP2 Clinical Centre Excel spreadsheet into APPROACH database

## Appendix 1: APPROACH WP2 Testing Site Excel Master Spreadsheet

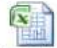

APPROACH WP2  
Testing Site Spreadst



Clinical trial protocol  
Study number : APPROACH-OA-P01

6 January 2017  
Version number: 1.0

## Appendix 2: Shipment Form

**Study APPROACH**  
Individual Shipment Form

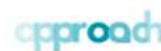

From: Centre test Adresse test 92100

To:

| Date of shipment | Day | Month | Year | Time |
|------------------|-----|-------|------|------|
|                  |     |       |      |      |

| Sample Type | Number of Cryoboxes | Number of Sample Tubes | Reception: OK/NOT OK | If NOT OK, Issue | Monitoring Date | Comments |
|-------------|---------------------|------------------------|----------------------|------------------|-----------------|----------|
| Serum       | 6                   | 600                    |                      |                  |                 |          |
|             |                     |                        |                      |                  |                 |          |
|             |                     |                        |                      |                  |                 |          |
|             |                     |                        |                      |                  |                 |          |

Acknowledgement at reception: Date / / Time :

Name:

Signature:

At Reception please fax this form to

Clinical trial protocol  
Study number : APPROACH-OA-P01

6 January 2017  
Version number: 1.0

### Appendix 3: Sample Barcode and Cryostorage Box Labeling

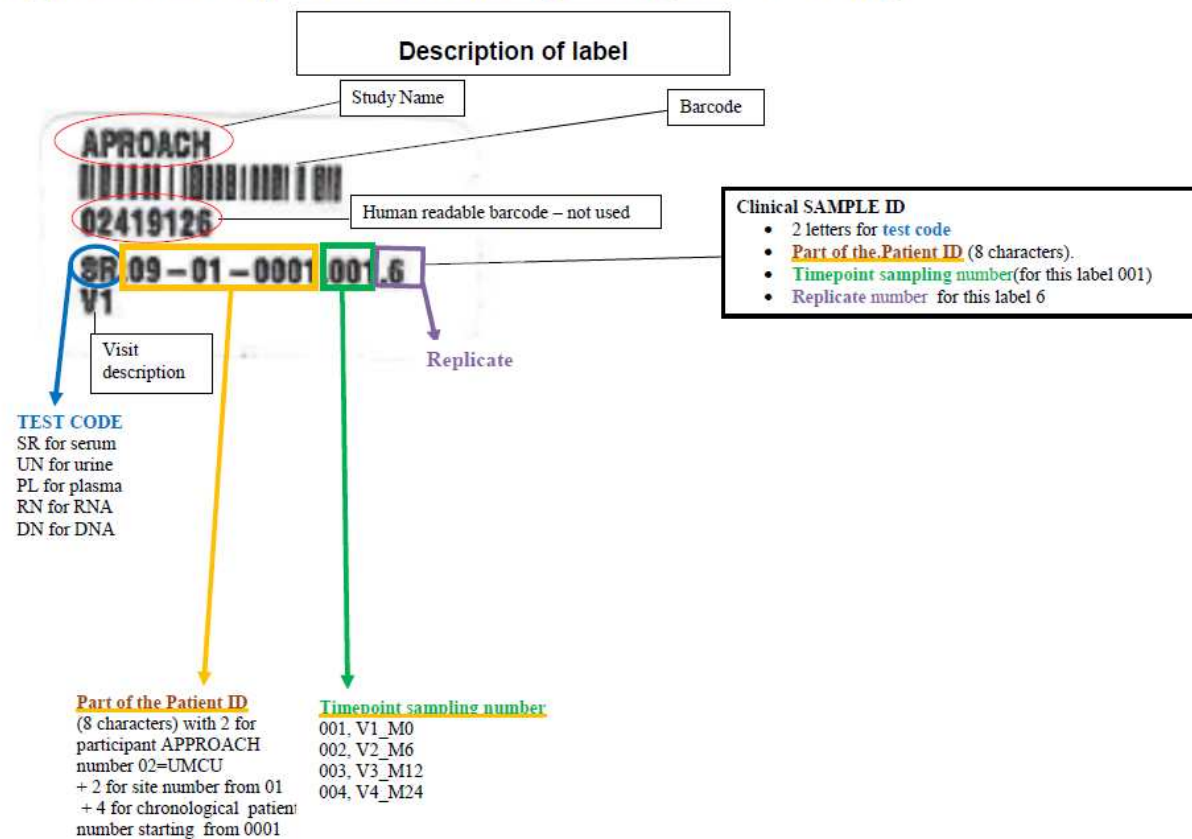

Property of APPROACH-OA - strictly confidential

Page 4

UMC Utrecht – dd 25-08-2017 (date of issue of protocol) - Confidential

## APPROACH Clinical study protocol- Final version V1.0\_NL

Clinical trial protocol  
Study number : APPROACH-OA-P01

6 January 2017  
Version number: 1.0

## Sample Testing/Storage Site Information

| Distribution Site | Analysis                                   | Sample Type(s)        | Sampling Visits  | Aliquots (per visit) | Aliquot Volume (mL)           | Subjects | Total Visits (per subject) | Total Tubes                    | # of (10x10) cryoboxes  | Aliquot #s (from barcode label) |
|-------------------|--------------------------------------------|-----------------------|------------------|----------------------|-------------------------------|----------|----------------------------|--------------------------------|-------------------------|---------------------------------|
| Nordic Bioscience | Biomarker                                  | Serum                 | M000-M024        | 5                    | 0.5                           | 300      | 4                          | 10000                          | 100                     | SR .5-.9                        |
| Artialis          | Biomarker                                  | Serum                 | M000-M024        | 3                    | 0.5                           | 300      | 4                          | 6000                           | 60                      | SR .10-.12                      |
| Lund              | Biomarker                                  | Serum                 | M000-M024        | 3                    | 0.5                           | 300      | 4                          | 6000                           | 60                      | SR .13-.15                      |
| Surrey            | Metabolomics                               | Plasma                | M000             | 2                    | 0.5                           | 300      | 1                          | 1000                           | 10                      | PL .2-.3                        |
| Sergas            | Proteomics                                 | Plasma                | M000             | 2                    | 0.5                           | 300      | 1                          | 1000                           | 10                      | PL .4-.5                        |
| LUMC              | Lipidomics                                 | Plasma                | M000             | 2                    | 0.5                           | 300      | 1                          | 1000                           | 10                      | PL .6-.7                        |
| AbbVie            | Transcriptomics<br>Genomics<br>Epigenetics | DNA<br>and<br>RNA     | M000 and<br>M024 | 1 DNA<br>1 RNA       | 8.5<br>DNA<br>2.5<br>RNA      | 300      | 2                          | 1000<br>DNA<br>1000<br>RNA     | 10 DNA<br>10 RNA        | DN .1<br>RN .1                  |
| BST               | Short Term Storage                         | Serum                 | M000-M024        | 2                    | 0.5                           | 300      | 4                          | 4000                           | 40                      | SR .16-.17                      |
| BST               | Long Term Storage                          | Serum<br>and<br>Urine | M000-M024        | 1 Serum<br>1 Urine   | 5.0<br>Serum<br>10.0<br>Urine | 300      | 4                          | 2000<br>Serum<br>2000<br>Urine | 20<br>Serum<br>20 Urine | SR .18<br>UR .3                 |

Clinical trial protocol  
Study number : APPROACH-OA-P01

6 January 2017  
Version number: 1.0

### Cryobox Labels for aliquot distribution:

#### Serum Aliquots

APPROACH SERUM Aliquots (0.5mL)  
Include SR tubes ending in: .5, .6, .7, .8  
and .9

Shipment to: Nordic Bioscience

APPROACH SERUM Aliquots (0.5mL)  
Include SR tubes ending in: .13, .14 and  
.15

Shipment to: Lund

APPROACH SERUM Aliquots (5mL)  
Include SR tubes ending in: .18

Shipment to: BST

#### Urine Aliquots

APPROACH URINE Aliquots (10mL)  
Include DN tubes ending in .3

Shipment to: BST

#### Plasma Aliquots

APPROACH SERUM Aliquots (0.5mL)  
Include SR tubes ending in: .10, .11 and .12

Shipment to: Artialis

APPROACH SERUM Aliquots (0.5mL)  
Include SR tubes ending in: .16 and .17

Shipment to: BST

---

*APPROACH Clinical study protocol- Final version V1.0\_NL*

---

Clinical trial protocol  
Study number : APPROACH-OA-P01

6 January 2017  
Version number: 1.0

**APPROACH PLASMA Aliquots (0.5mL)**

Include PL tubes ending in .2 and .3

Shipment to: LUMC

**APPROACH PLASMA Aliquots (0.5mL)**

Include PL tubes ending in: .4 and .5

Shipment to: Surrey

**APPROACH PLASMA Aliquots (0.5mL)**

Include PL tubes ending in: .6 and .7

Shipment to: Sergas

**DNA Samples**

APPROACH DNA Samples

Include DN tubes ending in .1

Shipment to: AbbVie

**RNA Samples**

APPROACH RNA Samples

Include RN tubes ending in .1

Shipment to: AbbVie

## SOP 11: Physical examination

V1.0 d.d. 29-MAR-2017

### Aim

To determine physical condition.

To determine knee, hip, and hand joint function (stiffness and inflammation)

### Duration of procedure

Approximately 30 minutes

### Preparation/prerequisites

- Automated blood pressure monitor
- Room with examination table
- Wall ruler
- Body weight scale
- Measuring tape
- Goniometer

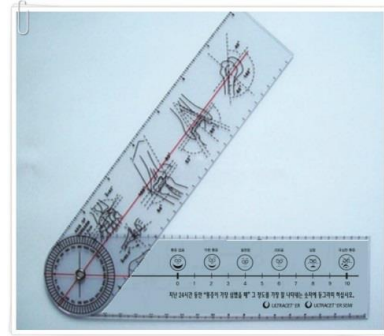

### Time points evaluated

Height, weight and index knee: Screening, M006, M012, and M024

Vital signs, hips, hands, contralateral knee: Inclusion, M006, M012, and M024

### Acquisition

- **Blood Pressure (SBP/DBP in mmHg)**

Patient needs to sit down for 3 minutes in a relaxed position. Patient's arm lies on the table/desk with open palm. Place cuff on the upper arm with the arrow pointing down (indicates artery). Cuff needs to be put at mid-sternal height. Make sure you use the correct cuff size (i.e. not too loose or tight). The patient is not allowed to talk during the measurement.

*Automatic blood pressure measurement:*

- *Selection of either left or right arm (only at inclusion)*

Measure blood pressure on the right arm. Register SBP/DBP. Repeat measurement on the left arm. When difference is >10mmHg SBP or >5mmHg DBP, select and register arm with highest pressure. When there is no relevant difference in pressure between arms, the right arm should be selected.

- *Blood pressure assessment*

Repeat measurement on selected arm twice. Report these two measurements in eCRF (average will be calculated). Use the same arm at every visit.

- **Pulse (in bpm)**

*Automatic blood pressure monitor:* measures pulse automatically. Again both measurements should be registered in the eCRF.

- **Height (only at screening, in cm)**

Patient is asked to **take off his/her shoes** and stand upright against the wall ruler.

- **Weight – undressed (in kg)**

Patient is asked to take place on a scale.

---

*APPROACH Clinical study protocol- Final version V1.0\_NL*

---

- **Waist circumference – undressed (in cm)**

Waist circumference: locate top of iliac crest. Place measuring tape in a horizontal plane around the abdomen at the level of iliac crests. Ensure that tape is tight-fitting, without compressing the skin, and is parallel to the floor. Ask the patient to breath out normally and measure at end of normal expiration.

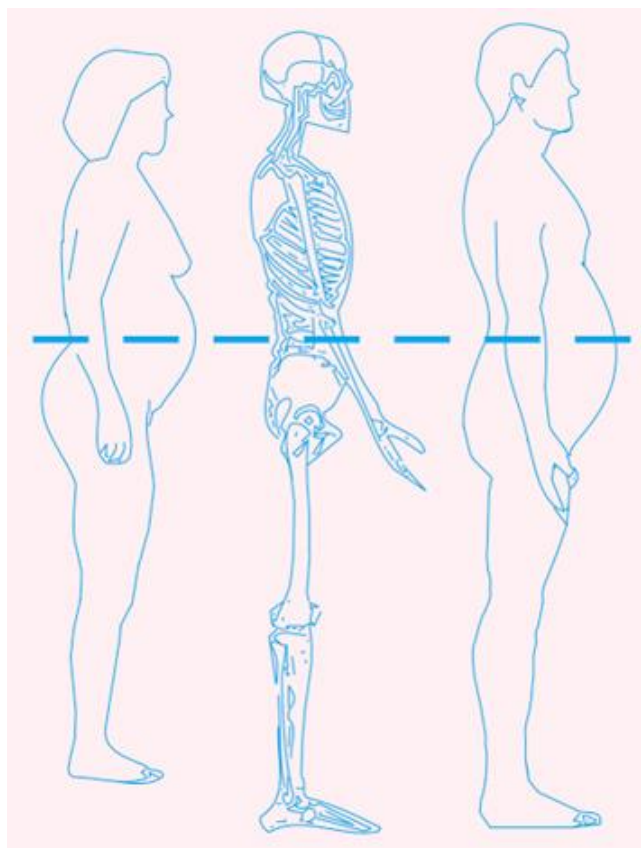

**Measuring-tape position for waist circumference in adults - *National Heart, Lung, and Blood Institute. The Practical Guide: Identification, Evaluation, and Treatment of Overweight and Obesity in Adults. US Department of Health and Human Services, Public Health Service, National Institutes of Health, National Heart Lung and Blood Institute, Bethesda, MD, October 2000.***

- **Knee – undressed. Examine both knees.**

- **Warmth:** Feel warmth with back of your hand. Register absence or presence of warmth.
- **Effusion (patellar tap):**

## APPROACH Clinical study protocol- Final version V1.0\_NL

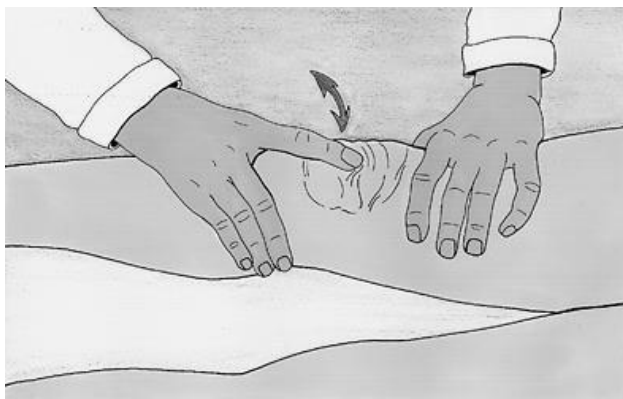**Patellar tap: Bouncing patella indicates presence of an effusion**

Slide down one hand from patient's thigh and slide up the other hand from patient's lower leg so that any effusion is collected under the patella. Use the index (and middle) finger of your lowest hand to swiftly but briskly tap the patella. If the patella bounces (patellar tap) this indicates the presence of an effusion. Register absence or presence of patellar tap.

- **Passive range of flexion:** Measure with goniometer. Register as either  $<90^\circ$ ,  $90^\circ$ - $120^\circ$ , or  $>120^\circ$
- **Passive range of extension:** Test for flexum. Grasp both heels with the patient lying on his or her back, with legs extended, and lift them to 10cm above the table. If leg can't be fully extended there is a knee flexum. Register presence or absence.
- **Grind test:** Place the web space of your thumb on the superior part of the patella, then ask patient to gradually contract the quadriceps muscle while pushing your hand downwards. Positive when grinding AND pain are present. Register presence or absence.

- **Hip – undressed. Examine both hips**

- **Passive range of flexion:** Measure with goniometer. Register as either  $<90^\circ$ ,  $90^\circ$ - $120^\circ$ , or  $>120^\circ$
- **Passive range of extension:** Test for flexum. Thomas test: Flex one hip to the maximum. When the contralateral leg cannot be held in full extension and in contact with the table, there is a flexum in the hip of that leg

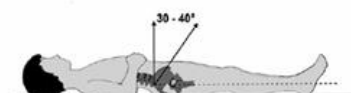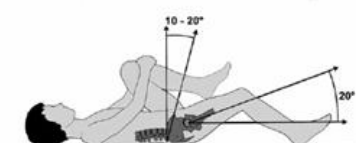**Thomas test: There is a flexum in the right hip**

- **Passive internal rotation:** Measure with goniometer with hip and knee both flexed at 90 degrees. Register as either  $<30^\circ$ ,  $30^\circ$ - $45^\circ$ , or  $>45^\circ$
- **Passive external rotation:** Measure with goniometer with hip and knee both flexed at 90 degrees. Register as either  $<30^\circ$ ,  $30^\circ$ - $45^\circ$ , or  $>45^\circ$



*APPROACH Clinical study protocol- Final version V1.0\_NL*

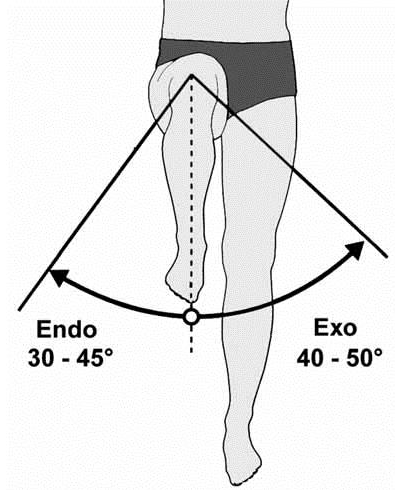

---

*APPROACH Clinical study protocol- Final version V1.0\_NL*

---

- **Hands. Examine both hands**
  - **Hard tissue enlargement/Bouchard nodules (PIPs) and Heberden nodules (DIPs):**  
location of affected joints
  - Number and location of **inflamed joints** as defined by soft synovial tissue swelling and/or fluctuation on palpation
  - **Doyle index:** Put thumbs on dorsal side of joint and index fingers on palmar side. Give pressure until own fingertips turn white. Grade pain in all DIP joints, PIP joints, MCP joints, IP joint of thumb and first CMC joint (Doyle 1981):
    - 0= no tenderness
    - 1= patient complains of pain
    - 2= patient complains of pain and winces
    - 3= patient complains of pain, winces and withdraws joint
  - **Subluxation MCP-1:** in relaxed position. Register as yes or no.
  - **Deformity of CMC-1, PIP-2, PIP-3, DIP-2 and DIP-3**

Ask patient whether pain was present in hand joints during a period of more than 20 days during the last month: yes/no

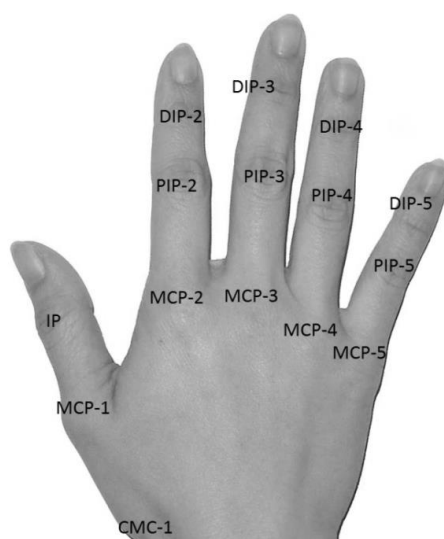

APPROACH Clinical study protocol- Final version V1.0\_NL

# PATIENT-ID

Date:  
M000/M006/M012/M024

## Physical examination

\* fill in a number

\*\* cross wrong answer(s)

\*\*\* answer YES/NO in general and write down which joints are affected

\*\*\*\* score 0-3

|                                                 |                             |                     |
|-------------------------------------------------|-----------------------------|---------------------|
| <b>General*</b>                                 |                             |                     |
| <input type="radio"/> Blood pressure            | .....mmHg                   |                     |
| <input type="radio"/> Pulse                     | .....bpm                    |                     |
| <input type="radio"/> Height                    | .....cm (only at screening) |                     |
| <input type="radio"/> Weight                    | .....kg                     |                     |
| <input type="radio"/> Waist circumference       | .....cm                     |                     |
| <b>Knee**</b>                                   | <b>Left</b>                 | <b>Right</b>        |
| <input type="radio"/> Warmth                    | YES/NO                      | YES/NO              |
| <input type="radio"/> Effusion                  | YES/NO                      | YES/NO              |
| <input type="radio"/> Passive flexion           | <90°/90°-120°/>120°         | <90°/90°-120°/>120° |
| <input type="radio"/> Passive extension: flexum | YES/NO                      | YES/NO              |
| <input type="radio"/> Patellar grinding         | YES/NO                      | YES/NO              |
| <input type="radio"/> Presence of varus         | YES/NO                      | YES/NO              |
| <input type="radio"/> Presence of valgus        | YES/NO                      | YES/NO              |
| <b>Hip**</b>                                    | <b>Left</b>                 | <b>Right</b>        |
| <input type="radio"/> Passive flexion           | <90°/90°-120°/>120°         | <90°/90°-120°/>120° |
| <input type="radio"/> Passive extension: flexum | YES/NO                      | YES/NO              |
| <input type="radio"/> Internal rotation         | <30°/30°-45°/>45°           | <30°/30°-45°/>45°   |
| <input type="radio"/> External rotation         | <30°/30°-45°/>45°           | <30°/30°-45°/>45°   |

## APPROACH Clinical study protocol- Final version V1.0\_NL

|                                                                                                                                                                                                                                                                                                           |                             |                    |
|-----------------------------------------------------------------------------------------------------------------------------------------------------------------------------------------------------------------------------------------------------------------------------------------------------------|-----------------------------|--------------------|
| <b>Hand***</b> <ul style="list-style-type: none"> <li>○ Heberden's nodes (DIP), mark as <b>H</b></li> <li>○ Bouchard's nodes (PIP), mark as <b>B</b></li> <li>○ Hard tissue enlargement other than Heberden or Bouchard nodules, mark as <b>E</b></li> <li>○ Inflamed joints, mark as <b>I</b></li> </ul> |                             |                    |
| 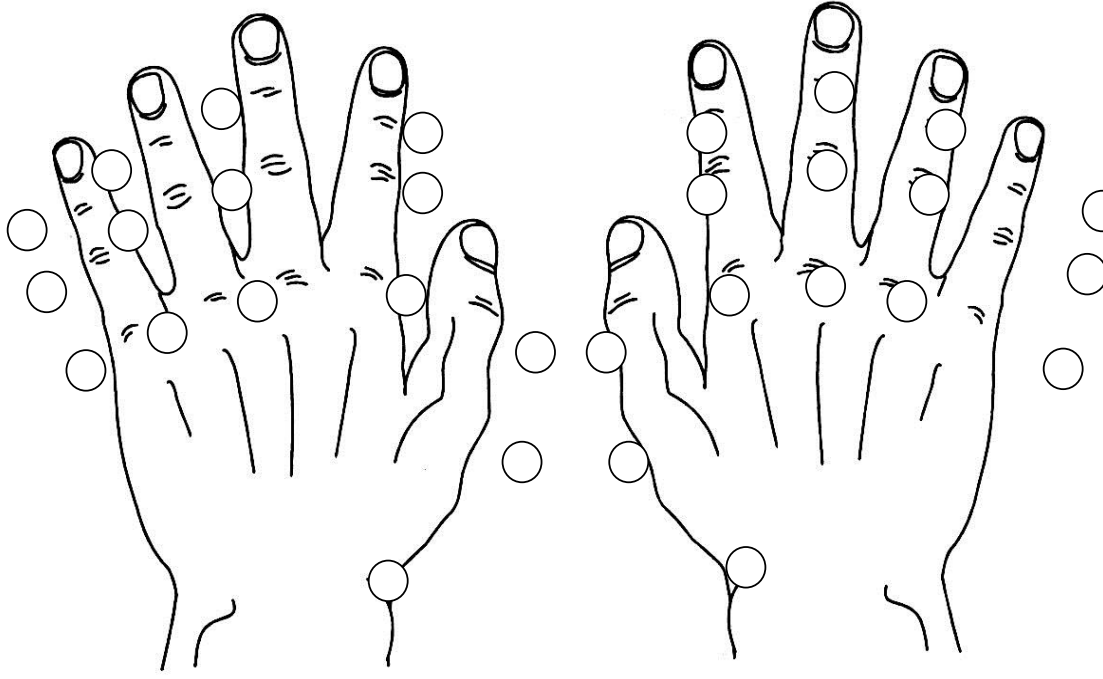                                                                                                                                                                                                                       |                             |                    |
| <b>Doyle index (Doyle 1981)****</b> <ul style="list-style-type: none"> <li>○ DIP-2</li> <li>○ DIP-3</li> <li>○ DIP-4</li> <li>○ DIP-5</li> <li>○ PIP-2</li> <li>○ PIP-3</li> <li>○ PIP-4</li> <li>○ PIP-5</li> <li>○ IP</li> <li>○ MCP-1</li> <li>○ MCP-2-5</li> <li>○ CMC-1</li> </ul>                   | <b>Left</b>                 | <b>Right</b>       |
|                                                                                                                                                                                                                                                                                                           | ...                         | ...                |
|                                                                                                                                                                                                                                                                                                           | ...                         | ...                |
|                                                                                                                                                                                                                                                                                                           | ...                         | ...                |
|                                                                                                                                                                                                                                                                                                           | ...                         | ...                |
|                                                                                                                                                                                                                                                                                                           | ...                         | ...                |
|                                                                                                                                                                                                                                                                                                           | ...                         | ...                |
|                                                                                                                                                                                                                                                                                                           | ...                         | ...                |
|                                                                                                                                                                                                                                                                                                           | ...                         | ...                |
|                                                                                                                                                                                                                                                                                                           | ...                         | ...                |
|                                                                                                                                                                                                                                                                                                           | ...                         | ...                |
|                                                                                                                                                                                                                                                                                                           | <b>Total left</b>           | <b>Total right</b> |
|                                                                                                                                                                                                                                                                                                           | <b>Total (left + right)</b> |                    |
| <b>Subluxation MCP-1**</b>                                                                                                                                                                                                                                                                                | <b>Left</b>                 | <b>Right</b>       |
|                                                                                                                                                                                                                                                                                                           | YES/NO                      | YES/NO             |
| <b>Deformity</b>                                                                                                                                                                                                                                                                                          | <b>Left</b>                 | <b>Right</b>       |
| ○ CMC-1                                                                                                                                                                                                                                                                                                   | YES/NO                      | YES/NO             |
| ○ DIP-2                                                                                                                                                                                                                                                                                                   | YES/NO                      | YES/NO             |
| ○ DIP-3                                                                                                                                                                                                                                                                                                   | YES/NO                      | YES/NO             |
| ○ PIP-2                                                                                                                                                                                                                                                                                                   | YES/NO                      | YES/NO             |
| ○ PIP-3                                                                                                                                                                                                                                                                                                   | YES/NO                      | YES/NO             |
| Has the patient pain present in hand joints during a period of more than 20 days during the last month?                                                                                                                                                                                                   | YES/NO                      |                    |

---

*APPROACH Clinical study protocol- Final version V1.0\_NL*

## **Appendix 4: Questionnaires**

---

*APPROACH Clinical study protocol- Final version V1.0\_NL*

---

**KOOS, reduced version, at screening**

Knee injury and Osteoarthritis Outcome Score (KOOS), English version LK1.0

1

|                         |
|-------------------------|
| <b>KOOS KNEE SURVEY</b> |
|-------------------------|

Today's date: \_\_\_\_ / \_\_\_\_ / \_\_\_\_ Date of birth: \_\_\_\_ / \_\_\_\_ / \_\_\_\_

Name: \_\_\_\_\_

**INSTRUCTIONS:** This survey asks for your view about your knee. This information will help us keep track of how you feel about your knee and how well you are able to perform your usual activities.  
Answer every question by ticking the appropriate box, only one box for each question. If you are unsure about how to answer a question, please give the best answer you can.

**Stiffness**

The following questions concern the amount of joint stiffness you have experienced during the **last 48 hours** in your knee. Stiffness is a sensation of restriction or slowness in the ease with which you move your knee joint.

S6. How severe is your knee joint stiffness after first wakening in the morning?

|                          |                          |                          |                          |                          |
|--------------------------|--------------------------|--------------------------|--------------------------|--------------------------|
| None                     | Mild                     | Moderate                 | Severe                   | Extreme                  |
| <input type="checkbox"/> |

S7. How severe is your knee stiffness after sitting, lying or resting **later in the day**?

|                          |                          |                          |                          |                          |
|--------------------------|--------------------------|--------------------------|--------------------------|--------------------------|
| None                     | Mild                     | Moderate                 | Severe                   | Extreme                  |
| <input type="checkbox"/> |

## APPROACH Clinical study protocol- Final version V1.0\_NL

Knee injury and Osteoarthritis Outcome Score (KOOS), English version LK1.0

2

**Pain**

P1. How often do you experience knee pain?

Never Monthly Weekly Daily Always

What amount of knee pain have you experienced the **last 48 hours** during the following activities ?

P2. Twisting/pivoting on your knee

None Mild Moderate Severe Extreme

P3. Straightening knee fully

None Mild Moderate Severe Extreme

P4. Bending knee fully

None Mild Moderate Severe Extreme

P5. Walking on flat surface

None Mild Moderate Severe Extreme

P6. Going up or down stairs

None Mild Moderate Severe Extreme

P7. At night while in bed

None Mild Moderate Severe Extreme

P8. Sitting or lying

None Mild Moderate Severe Extreme

P9. Standing upright

None Mild Moderate Severe Extreme

**Function, daily living**

The following questions concern your physical function. By this we mean your ability to move around and to look after yourself. For each of the following activities please indicate the degree of difficulty you have experienced in the **last 48 hours** due to your knee.

A1. Descending stairs

None Mild Moderate Severe Extreme

A2. Ascending stairs

None Mild Moderate Severe Extreme

---

 APPROACH Clinical study protocol- Final version V1.0\_NL
 

---

Knee injury and Osteoarthritis Outcome Score (KOOS), English version LK1.0

3

For each of the following activities please indicate the degree of difficulty you have experienced in the **last 48 hours** due to your knee.

|                                                             |                                  |                                  |                                      |                                    |                                     |
|-------------------------------------------------------------|----------------------------------|----------------------------------|--------------------------------------|------------------------------------|-------------------------------------|
| A3. Rising from sitting                                     | None<br><input type="checkbox"/> | Mild<br><input type="checkbox"/> | Moderate<br><input type="checkbox"/> | Severe<br><input type="checkbox"/> | Extreme<br><input type="checkbox"/> |
| A4. Standing                                                | None<br><input type="checkbox"/> | Mild<br><input type="checkbox"/> | Moderate<br><input type="checkbox"/> | Severe<br><input type="checkbox"/> | Extreme<br><input type="checkbox"/> |
| A5. Bending to floor/pick up an object                      | None<br><input type="checkbox"/> | Mild<br><input type="checkbox"/> | Moderate<br><input type="checkbox"/> | Severe<br><input type="checkbox"/> | Extreme<br><input type="checkbox"/> |
| A6. Walking on flat surface                                 | None<br><input type="checkbox"/> | Mild<br><input type="checkbox"/> | Moderate<br><input type="checkbox"/> | Severe<br><input type="checkbox"/> | Extreme<br><input type="checkbox"/> |
| A7. Getting in/out of car                                   | None<br><input type="checkbox"/> | Mild<br><input type="checkbox"/> | Moderate<br><input type="checkbox"/> | Severe<br><input type="checkbox"/> | Extreme<br><input type="checkbox"/> |
| A8. Going shopping                                          | None<br><input type="checkbox"/> | Mild<br><input type="checkbox"/> | Moderate<br><input type="checkbox"/> | Severe<br><input type="checkbox"/> | Extreme<br><input type="checkbox"/> |
| A9. Putting on socks/stockings                              | None<br><input type="checkbox"/> | Mild<br><input type="checkbox"/> | Moderate<br><input type="checkbox"/> | Severe<br><input type="checkbox"/> | Extreme<br><input type="checkbox"/> |
| A10. Rising from bed                                        | None<br><input type="checkbox"/> | Mild<br><input type="checkbox"/> | Moderate<br><input type="checkbox"/> | Severe<br><input type="checkbox"/> | Extreme<br><input type="checkbox"/> |
| A11. Taking off socks/stockings                             | None<br><input type="checkbox"/> | Mild<br><input type="checkbox"/> | Moderate<br><input type="checkbox"/> | Severe<br><input type="checkbox"/> | Extreme<br><input type="checkbox"/> |
| A12. Lying in bed (turning over, maintaining knee position) | None<br><input type="checkbox"/> | Mild<br><input type="checkbox"/> | Moderate<br><input type="checkbox"/> | Severe<br><input type="checkbox"/> | Extreme<br><input type="checkbox"/> |
| A13. Getting in/out of bath                                 | None<br><input type="checkbox"/> | Mild<br><input type="checkbox"/> | Moderate<br><input type="checkbox"/> | Severe<br><input type="checkbox"/> | Extreme<br><input type="checkbox"/> |
| A14. Sitting                                                | None<br><input type="checkbox"/> | Mild<br><input type="checkbox"/> | Moderate<br><input type="checkbox"/> | Severe<br><input type="checkbox"/> | Extreme<br><input type="checkbox"/> |
| A15. Getting on/off toilet                                  | None<br><input type="checkbox"/> | Mild<br><input type="checkbox"/> | Moderate<br><input type="checkbox"/> | Severe<br><input type="checkbox"/> | Extreme<br><input type="checkbox"/> |



---

*APPROACH Clinical study protocol- Final version V1.0\_NL*

---

Knee injury and Osteoarthritis Outcome Score (KOOS), English version LK1.0

4

For each of the following activities please indicate the degree of difficulty you have experienced in the **last 48 hours** due to your knee.

For each of the following activities please indicate the degree of difficulty you have experienced in the **last week** due to your knee

A16. Heavy domestic duties (moving heavy boxes, scrubbing floors, etc)

|                          |                          |                          |                          |                          |
|--------------------------|--------------------------|--------------------------|--------------------------|--------------------------|
| None                     | Mild                     | Moderate                 | Severe                   | Extreme                  |
| <input type="checkbox"/> |

A17. Light domestic duties (cooking, dusting, etc)

|                          |                          |                          |                          |                          |
|--------------------------|--------------------------|--------------------------|--------------------------|--------------------------|
| None                     | Mild                     | Moderate                 | Severe                   | Extreme                  |
| <input type="checkbox"/> |

## APPROACH Clinical study protocol- Final version V1.0\_NL

## KOOS for visits other than screening

Knee injury and Osteoarthritis Outcome Score (KOOS), English version LK1.0

1

|                         |
|-------------------------|
| <b>KOOS KNEE SURVEY</b> |
|-------------------------|

Today's date: \_\_\_/\_\_\_/\_\_\_ Date of birth: \_\_\_/\_\_\_/\_\_\_

Name: \_\_\_\_\_

**INSTRUCTIONS:** This survey asks for your view about your knee. This information will help us keep track of how you feel about your knee and how well you are able to perform your usual activities. Answer every question by ticking the appropriate box, only one box for each question. If you are unsure about how to answer a question, please give the best answer you can.

**Symptoms**

These questions should be answered thinking of your knee symptoms during the last week.

S1. Do you have swelling in your knee?

|                          |                          |                          |                          |                          |
|--------------------------|--------------------------|--------------------------|--------------------------|--------------------------|
| Never                    | Rarely                   | Sometimes                | Often                    | Always                   |
| <input type="checkbox"/> |

S2. Do you feel grinding, hear clicking or any other type of noise when your knee moves?

|                          |                          |                          |                          |                          |
|--------------------------|--------------------------|--------------------------|--------------------------|--------------------------|
| Never                    | Rarely                   | Sometimes                | Often                    | Always                   |
| <input type="checkbox"/> |

S3. Does your knee catch or hang up when moving?

|                          |                          |                          |                          |                          |
|--------------------------|--------------------------|--------------------------|--------------------------|--------------------------|
| Never                    | Rarely                   | Sometimes                | Often                    | Always                   |
| <input type="checkbox"/> |

S4. Can you straighten your knee fully?

|                          |                          |                          |                          |                          |
|--------------------------|--------------------------|--------------------------|--------------------------|--------------------------|
| Always                   | Often                    | Sometimes                | Rarely                   | Never                    |
| <input type="checkbox"/> |

S5. Can you bend your knee fully?

|                          |                          |                          |                          |                          |
|--------------------------|--------------------------|--------------------------|--------------------------|--------------------------|
| Always                   | Often                    | Sometimes                | Rarely                   | Never                    |
| <input type="checkbox"/> |

**Stiffness**

The following questions concern the amount of joint stiffness you have experienced during the last week in your knee. Stiffness is a sensation of restriction or slowness in the ease with which you move your knee joint.

S6. How severe is your knee joint stiffness after first wakening in the morning?

|                          |                          |                          |                          |                          |
|--------------------------|--------------------------|--------------------------|--------------------------|--------------------------|
| None                     | Mild                     | Moderate                 | Severe                   | Extreme                  |
| <input type="checkbox"/> |

S7. How severe is your knee stiffness after sitting, lying or resting later in the day?

|                          |                          |                          |                          |                          |
|--------------------------|--------------------------|--------------------------|--------------------------|--------------------------|
| None                     | Mild                     | Moderate                 | Severe                   | Extreme                  |
| <input type="checkbox"/> |

## APPROACH Clinical study protocol- Final version V1.0\_NL

Knee injury and Osteoarthritis Outcome Score (KOOS), English version LK1.0

2

**Pain**

P1. How often do you experience knee pain?

|                          |                          |                          |                          |                          |
|--------------------------|--------------------------|--------------------------|--------------------------|--------------------------|
| Never                    | Monthly                  | Weekly                   | Daily                    | Always                   |
| <input type="checkbox"/> |

What amount of knee pain have you experienced the last week during the following activities?

P2. Twisting/pivoting on your knee

|                          |                          |                          |                          |                          |
|--------------------------|--------------------------|--------------------------|--------------------------|--------------------------|
| None                     | Mild                     | Moderate                 | Severe                   | Extreme                  |
| <input type="checkbox"/> |

P3. Straightening knee fully

|                          |                          |                          |                          |                          |
|--------------------------|--------------------------|--------------------------|--------------------------|--------------------------|
| None                     | Mild                     | Moderate                 | Severe                   | Extreme                  |
| <input type="checkbox"/> |

P4. Bending knee fully

|                          |                          |                          |                          |                          |
|--------------------------|--------------------------|--------------------------|--------------------------|--------------------------|
| None                     | Mild                     | Moderate                 | Severe                   | Extreme                  |
| <input type="checkbox"/> |

P5. Walking on flat surface

|                          |                          |                          |                          |                          |
|--------------------------|--------------------------|--------------------------|--------------------------|--------------------------|
| None                     | Mild                     | Moderate                 | Severe                   | Extreme                  |
| <input type="checkbox"/> |

P6. Going up or down stairs

|                          |                          |                          |                          |                          |
|--------------------------|--------------------------|--------------------------|--------------------------|--------------------------|
| None                     | Mild                     | Moderate                 | Severe                   | Extreme                  |
| <input type="checkbox"/> |

P7. At night while in bed

|                          |                          |                          |                          |                          |
|--------------------------|--------------------------|--------------------------|--------------------------|--------------------------|
| None                     | Mild                     | Moderate                 | Severe                   | Extreme                  |
| <input type="checkbox"/> |

P8. Sitting or lying

|                          |                          |                          |                          |                          |
|--------------------------|--------------------------|--------------------------|--------------------------|--------------------------|
| None                     | Mild                     | Moderate                 | Severe                   | Extreme                  |
| <input type="checkbox"/> |

P9. Standing upright

|                          |                          |                          |                          |                          |
|--------------------------|--------------------------|--------------------------|--------------------------|--------------------------|
| None                     | Mild                     | Moderate                 | Severe                   | Extreme                  |
| <input type="checkbox"/> |

**Function, daily living**

The following questions concern your physical function. By this we mean your ability to move around and to look after yourself. For each of the following activities please indicate the degree of difficulty you have experienced in the last week due to your knee.

A1. Descending stairs

|                          |                          |                          |                          |                          |
|--------------------------|--------------------------|--------------------------|--------------------------|--------------------------|
| None                     | Mild                     | Moderate                 | Severe                   | Extreme                  |
| <input type="checkbox"/> |

A2. Ascending stairs

|                          |                          |                          |                          |                          |
|--------------------------|--------------------------|--------------------------|--------------------------|--------------------------|
| None                     | Mild                     | Moderate                 | Severe                   | Extreme                  |
| <input type="checkbox"/> |

*APPROACH Clinical study protocol- Final version V1.0\_NL*

Knee injury and Osteoarthritis Outcome Score (KOOS), English version LK1.0

3

For each of the following activities please indicate the degree of difficulty you have experienced in the last week due to your knee.

|                                                             |                          |                          |                          |                          |                          |
|-------------------------------------------------------------|--------------------------|--------------------------|--------------------------|--------------------------|--------------------------|
| A3. Rising from sitting                                     | None                     | Mild                     | Moderate                 | Severe                   | Extreme                  |
|                                                             | <input type="checkbox"/> |
| A4. Standing                                                | None                     | Mild                     | Moderate                 | Severe                   | Extreme                  |
|                                                             | <input type="checkbox"/> |
| A5. Bending to floor/pick up an object                      | None                     | Mild                     | Moderate                 | Severe                   | Extreme                  |
|                                                             | <input type="checkbox"/> |
| A6. Walking on flat surface                                 | None                     | Mild                     | Moderate                 | Severe                   | Extreme                  |
|                                                             | <input type="checkbox"/> |
| A7. Getting in/out of car                                   | None                     | Mild                     | Moderate                 | Severe                   | Extreme                  |
|                                                             | <input type="checkbox"/> |
| A8. Going shopping                                          | None                     | Mild                     | Moderate                 | Severe                   | Extreme                  |
|                                                             | <input type="checkbox"/> |
| A9. Putting on socks/stockings                              | None                     | Mild                     | Moderate                 | Severe                   | Extreme                  |
|                                                             | <input type="checkbox"/> |
| A10. Rising from bed                                        | None                     | Mild                     | Moderate                 | Severe                   | Extreme                  |
|                                                             | <input type="checkbox"/> |
| A11. Taking off socks/stockings                             | None                     | Mild                     | Moderate                 | Severe                   | Extreme                  |
|                                                             | <input type="checkbox"/> |
| A12. Lying in bed (turning over, maintaining knee position) | None                     | Mild                     | Moderate                 | Severe                   | Extreme                  |
|                                                             | <input type="checkbox"/> |
| A13. Getting in/out of bath                                 | None                     | Mild                     | Moderate                 | Severe                   | Extreme                  |
|                                                             | <input type="checkbox"/> |
| A14. Sitting                                                | None                     | Mild                     | Moderate                 | Severe                   | Extreme                  |
|                                                             | <input type="checkbox"/> |
| A15. Getting on/off toilet                                  | None                     | Mild                     | Moderate                 | Severe                   | Extreme                  |
|                                                             | <input type="checkbox"/> |

---

 APPROACH Clinical study protocol- Final version V1.0\_NL
 

---

Knee injury and Osteoarthritis Outcome Score (KOOS), English version LK1.0

4

For each of the following activities please indicate the degree of difficulty you have experienced in the last week due to your knee.

A16. Heavy domestic duties (moving heavy boxes, scrubbing floors, etc)

|                          |                          |                          |                          |                          |
|--------------------------|--------------------------|--------------------------|--------------------------|--------------------------|
| None                     | Mild                     | Moderate                 | Severe                   | Extreme                  |
| <input type="checkbox"/> |

A17. Light domestic duties (cooking, dusting, etc)

|                          |                          |                          |                          |                          |
|--------------------------|--------------------------|--------------------------|--------------------------|--------------------------|
| None                     | Mild                     | Moderate                 | Severe                   | Extreme                  |
| <input type="checkbox"/> |

**Function, sports and recreational activities**

The following questions concern your physical function when being active on a higher level. The questions should be answered thinking of what degree of difficulty you have experienced during the last week due to your knee.

SP1. Squatting

|                          |                          |                          |                          |                          |
|--------------------------|--------------------------|--------------------------|--------------------------|--------------------------|
| None                     | Mild                     | Moderate                 | Severe                   | Extreme                  |
| <input type="checkbox"/> |

SP2. Running

|                          |                          |                          |                          |                          |
|--------------------------|--------------------------|--------------------------|--------------------------|--------------------------|
| None                     | Mild                     | Moderate                 | Severe                   | Extreme                  |
| <input type="checkbox"/> |

SP3. Jumping

|                          |                          |                          |                          |                          |
|--------------------------|--------------------------|--------------------------|--------------------------|--------------------------|
| None                     | Mild                     | Moderate                 | Severe                   | Extreme                  |
| <input type="checkbox"/> |

SP4. Twisting/pivoting on your injured knee

|                          |                          |                          |                          |                          |
|--------------------------|--------------------------|--------------------------|--------------------------|--------------------------|
| None                     | Mild                     | Moderate                 | Severe                   | Extreme                  |
| <input type="checkbox"/> |

SP5. Kneeling

|                          |                          |                          |                          |                          |
|--------------------------|--------------------------|--------------------------|--------------------------|--------------------------|
| None                     | Mild                     | Moderate                 | Severe                   | Extreme                  |
| <input type="checkbox"/> |

**Quality of Life**

Q1. How often are you aware of your knee problem?

|                          |                          |                          |                          |                          |
|--------------------------|--------------------------|--------------------------|--------------------------|--------------------------|
| Never                    | Monthly                  | Weekly                   | Daily                    | Constantly               |
| <input type="checkbox"/> |

Q2. Have you modified your life style to avoid potentially damaging activities to your knee?

|                          |                          |                          |                          |                          |
|--------------------------|--------------------------|--------------------------|--------------------------|--------------------------|
| Not at all               | Mildly                   | Moderately               | Severely                 | Totally                  |
| <input type="checkbox"/> |

Q3. How much are you troubled with lack of confidence in your knee?

|                          |                          |                          |                          |                          |
|--------------------------|--------------------------|--------------------------|--------------------------|--------------------------|
| Not at all               | Mildly                   | Moderately               | Severely                 | Extremely                |
| <input type="checkbox"/> |

Q4. In general, how much difficulty do you have with your knee?

|                          |                          |                          |                          |                          |
|--------------------------|--------------------------|--------------------------|--------------------------|--------------------------|
| None                     | Mild                     | Moderate                 | Severe                   | Extreme                  |
| <input type="checkbox"/> |

*Thank you very much for completing all the questions in this questionnaire.*

## APPROACH Clinical study protocol- Final version V1.0\_NL

## HOOS HIP SURVEY

Hip dysfunction and Osteoarthritis Outcome Score (HOOS), English version LK 2.0

1

## HOOS HIP SURVEY

Today's date: \_\_\_\_/\_\_\_\_/\_\_\_\_ Date of birth: \_\_\_\_/\_\_\_\_/\_\_\_\_

Name: \_\_\_\_\_

**INSTRUCTIONS:** This survey asks for your view about your hip. This information will help us keep track of how you feel about your hip and how well you are able to do your usual activities.

Answer every question by ticking the appropriate box, only one box for each question. If you are uncertain about how to answer a question, please give the best answer you can.

**Symptoms**

These questions should be answered thinking of your hip symptoms and difficulties during the last week.

S1. Do you feel grinding, hear clicking or any other type of noise from your hip?

Never                      Rarely                      Sometimes                      Often                      Always

                                                                                      

S2. Difficulties spreading legs wide apart

None                      Mild                      Moderate                      Severe                      Extreme

                                                                                      

S3. Difficulties to stride out when walking

None                      Mild                      Moderate                      Severe                      Extreme

                                                                                      

**Stiffness**

The following questions concern the amount of joint stiffness you have experienced during the last week in your hip. Stiffness is a sensation of restriction or slowness in the ease with which you move your hip joint.

S4. How severe is your hip joint stiffness after first wakening in the morning?

None                      Mild                      Moderate                      Severe                      Extreme

                                                                                      

S5. How severe is your hip stiffness after sitting, lying or resting later in the day?

None                      Mild                      Moderate                      Severe                      Extreme

                                                                                      

**Pain**

P1. How often is your hip painful?

Never                      Monthly                      Weekly                      Daily                      Always

                                                                                      

What amount of hip pain have you experienced the last week during the following activities?

P2. Straightening your hip fully

None                      Mild                      Moderate                      Severe                      Extreme

*APPROACH Clinical study protocol- Final version V1.0\_NL*

Hip dysfunction and Osteoarthritis Outcome Score (HOOS), English version LK 2.0

2

What amount of hip pain have you experienced the last week during the following activities?

P3. Bending your hip fully

|                          |                          |                          |                          |                          |
|--------------------------|--------------------------|--------------------------|--------------------------|--------------------------|
| None                     | Mild                     | Moderate                 | Severe                   | Extreme                  |
| <input type="checkbox"/> |

P4. Walking on a flat surface

|                          |                          |                          |                          |                          |
|--------------------------|--------------------------|--------------------------|--------------------------|--------------------------|
| None                     | Mild                     | Moderate                 | Severe                   | Extreme                  |
| <input type="checkbox"/> |

P5. Going up or down stairs

|                          |                          |                          |                          |                          |
|--------------------------|--------------------------|--------------------------|--------------------------|--------------------------|
| None                     | Mild                     | Moderate                 | Severe                   | Extreme                  |
| <input type="checkbox"/> |

P6. At night while in bed

|                          |                          |                          |                          |                          |
|--------------------------|--------------------------|--------------------------|--------------------------|--------------------------|
| None                     | Mild                     | Moderate                 | Severe                   | Extreme                  |
| <input type="checkbox"/> |

P7. Sitting or lying

|                          |                          |                          |                          |                          |
|--------------------------|--------------------------|--------------------------|--------------------------|--------------------------|
| None                     | Mild                     | Moderate                 | Severe                   | Extreme                  |
| <input type="checkbox"/> |

P8. Standing upright

|                          |                          |                          |                          |                          |
|--------------------------|--------------------------|--------------------------|--------------------------|--------------------------|
| None                     | Mild                     | Moderate                 | Severe                   | Extreme                  |
| <input type="checkbox"/> |

P9. Walking on a hard surface (asphalt, concrete, etc.)

|                          |                          |                          |                          |                          |
|--------------------------|--------------------------|--------------------------|--------------------------|--------------------------|
| None                     | Mild                     | Moderate                 | Severe                   | Extreme                  |
| <input type="checkbox"/> |

P10. Walking on an uneven surface

|                          |                          |                          |                          |                          |
|--------------------------|--------------------------|--------------------------|--------------------------|--------------------------|
| None                     | Mild                     | Moderate                 | Severe                   | Extreme                  |
| <input type="checkbox"/> |

**Function, daily living**

The following questions concern your physical function. By this we mean your ability to move around and to look after yourself. For each of the following activities please indicate the degree of difficulty you have experienced in the last week due to your hip.

A1. Descending stairs

|                          |                          |                          |                          |                          |
|--------------------------|--------------------------|--------------------------|--------------------------|--------------------------|
| None                     | Mild                     | Moderate                 | Severe                   | Extreme                  |
| <input type="checkbox"/> |

A2. Ascending stairs

|                          |                          |                          |                          |                          |
|--------------------------|--------------------------|--------------------------|--------------------------|--------------------------|
| None                     | Mild                     | Moderate                 | Severe                   | Extreme                  |
| <input type="checkbox"/> |

A3. Rising from sitting

|                          |                          |                          |                          |                          |
|--------------------------|--------------------------|--------------------------|--------------------------|--------------------------|
| None                     | Mild                     | Moderate                 | Severe                   | Extreme                  |
| <input type="checkbox"/> |

A4. Standing

|                          |                          |                          |                          |                          |
|--------------------------|--------------------------|--------------------------|--------------------------|--------------------------|
| None                     | Mild                     | Moderate                 | Severe                   | Extreme                  |
| <input type="checkbox"/> |

---

 APPROACH Clinical study protocol- Final version V1.0\_NL
 

---

Hip dysfunction and Osteoarthritis Outcome Score (HOOS), English version LK 2.0

3

For each of the following activities please indicate the degree of difficulty you have experienced in the last week due to your hip.

A5. Bending to the floor/pick up an object

|                          |                          |                          |                          |                          |
|--------------------------|--------------------------|--------------------------|--------------------------|--------------------------|
| None                     | Mild                     | Moderate                 | Severe                   | Extreme                  |
| <input type="checkbox"/> |

A6. Walking on a flat surface

|                          |                          |                          |                          |                          |
|--------------------------|--------------------------|--------------------------|--------------------------|--------------------------|
| None                     | Mild                     | Moderate                 | Severe                   | Extreme                  |
| <input type="checkbox"/> |

A7. Getting in/out of car

|                          |                          |                          |                          |                          |
|--------------------------|--------------------------|--------------------------|--------------------------|--------------------------|
| None                     | Mild                     | Moderate                 | Severe                   | Extreme                  |
| <input type="checkbox"/> |

A8. Going shopping

|                          |                          |                          |                          |                          |
|--------------------------|--------------------------|--------------------------|--------------------------|--------------------------|
| None                     | Mild                     | Moderate                 | Severe                   | Extreme                  |
| <input type="checkbox"/> |

A9. Putting on socks/stockings

|                          |                          |                          |                          |                          |
|--------------------------|--------------------------|--------------------------|--------------------------|--------------------------|
| None                     | Mild                     | Moderate                 | Severe                   | Extreme                  |
| <input type="checkbox"/> |

A10. Rising from bed

|                          |                          |                          |                          |                          |
|--------------------------|--------------------------|--------------------------|--------------------------|--------------------------|
| None                     | Mild                     | Moderate                 | Severe                   | Extreme                  |
| <input type="checkbox"/> |

A11. Taking off socks/stockings

|                          |                          |                          |                          |                          |
|--------------------------|--------------------------|--------------------------|--------------------------|--------------------------|
| None                     | Mild                     | Moderate                 | Severe                   | Extreme                  |
| <input type="checkbox"/> |

A12. Lying in bed (turning over, maintaining hip position)

|                          |                          |                          |                          |                          |
|--------------------------|--------------------------|--------------------------|--------------------------|--------------------------|
| None                     | Mild                     | Moderate                 | Severe                   | Extreme                  |
| <input type="checkbox"/> |

A13. Getting in/out of bath

|                          |                          |                          |                          |                          |
|--------------------------|--------------------------|--------------------------|--------------------------|--------------------------|
| None                     | Mild                     | Moderate                 | Severe                   | Extreme                  |
| <input type="checkbox"/> |

A14. Sitting

|                          |                          |                          |                          |                          |
|--------------------------|--------------------------|--------------------------|--------------------------|--------------------------|
| None                     | Mild                     | Moderate                 | Severe                   | Extreme                  |
| <input type="checkbox"/> |

A15. Getting on/off toilet

|                          |                          |                          |                          |                          |
|--------------------------|--------------------------|--------------------------|--------------------------|--------------------------|
| None                     | Mild                     | Moderate                 | Severe                   | Extreme                  |
| <input type="checkbox"/> |

A16. Heavy domestic duties (moving heavy boxes, scrubbing floors, etc)

|                          |                          |                          |                          |                          |
|--------------------------|--------------------------|--------------------------|--------------------------|--------------------------|
| None                     | Mild                     | Moderate                 | Severe                   | Extreme                  |
| <input type="checkbox"/> |

A17. Light domestic duties (cooking, dusting, etc)

|                          |                          |                          |                          |                          |
|--------------------------|--------------------------|--------------------------|--------------------------|--------------------------|
| None                     | Mild                     | Moderate                 | Severe                   | Extreme                  |
| <input type="checkbox"/> |



*APPROACH Clinical study protocol- Final version V1.0\_NL*

Hip dysfunction and Osteoarthritis Outcome Score (HOOS), English version LK 2.0

4

**Function, sports and recreational activities**

The following questions concern your physical function when being active on a higher level. The questions should be answered thinking of what degree of difficulty you have experienced during the last week due to your hip.

**SP1. Squatting**

|                          |                          |                          |                          |                          |
|--------------------------|--------------------------|--------------------------|--------------------------|--------------------------|
| None                     | Mild                     | Moderate                 | Severe                   | Extreme                  |
| <input type="checkbox"/> |

**SP2. Running**

|                          |                          |                          |                          |                          |
|--------------------------|--------------------------|--------------------------|--------------------------|--------------------------|
| None                     | Mild                     | Moderate                 | Severe                   | Extreme                  |
| <input type="checkbox"/> |

**SP3. Twisting/pivoting on loaded leg**

|                          |                          |                          |                          |                          |
|--------------------------|--------------------------|--------------------------|--------------------------|--------------------------|
| None                     | Mild                     | Moderate                 | Severe                   | Extreme                  |
| <input type="checkbox"/> |

**SP4. Walking on uneven surface**

|                          |                          |                          |                          |                          |
|--------------------------|--------------------------|--------------------------|--------------------------|--------------------------|
| None                     | Mild                     | Moderate                 | Severe                   | Extreme                  |
| <input type="checkbox"/> |

**Quality of Life****Q1. How often are you aware of your hip problem?**

|                          |                          |                          |                          |                          |
|--------------------------|--------------------------|--------------------------|--------------------------|--------------------------|
| Never                    | Monthly                  | Weekly                   | Daily                    | Constantly               |
| <input type="checkbox"/> |

**Q2. Have you modified your life style to avoid activities potentially demanding to your hip?**

|                          |                          |                          |                          |                          |
|--------------------------|--------------------------|--------------------------|--------------------------|--------------------------|
| Not at all               | Mildly                   | Moderately               | Severely                 | Totally                  |
| <input type="checkbox"/> |

**Q3. How much are you troubled with lack of confidence in your hip?**

|                          |                          |                          |                          |                          |
|--------------------------|--------------------------|--------------------------|--------------------------|--------------------------|
| Not at all               | Mildly                   | Moderately               | Severely                 | Extremely                |
| <input type="checkbox"/> |

**Q4. In general, how much difficulty do you have with your hip?**

|                          |                          |                          |                          |                          |
|--------------------------|--------------------------|--------------------------|--------------------------|--------------------------|
| None                     | Mild                     | Moderate                 | Severe                   | Extreme                  |
| <input type="checkbox"/> |

**Thank you very much for completing all the questions  
in this questionnaire.**

## APPROACH Clinical study protocol- Final version V1.0\_NL

**A Measure of Intermittent and constant osteoarthritis Pain, ICOAP Knee version and Hip version**

{merge ID here}

**A Measure of Intermittent and Constant Osteoarthritis Pain, ICOAP: KNEE Version**

People have told us that they experience different kinds of pain (including aching or discomfort) in their knee. To get a better sense of the different types of knee pain you may experience, we would like to ask you about any "constant pain" (pain you have all the time) separately from any pain that you may experience less often, that is, "pain that comes and goes". The following questions will ask you about the pain that you have experienced in your knee in the PAST WEEK. Please answer ALL questions.

**A) CONSTANT PAIN**

For each of the following questions, please select the response that best describes, on average, your constant knee pain in the PAST WEEK.

1. In the past week, how intense has your constant knee pain been?

<sub>0</sub> Not at all/  
No constant knee pain

<sub>1</sub> Mildly

<sub>2</sub> Moderately

<sub>3</sub> Severely

<sub>4</sub> Extremely

2. In the past week, how much has your constant knee pain affected your life?

<sub>0</sub> Not at all/  
No constant knee pain

<sub>1</sub> Mildly

<sub>2</sub> Moderately

<sub>3</sub> Severely

<sub>4</sub> Extremely

3. In the past week, how much has your constant knee pain affected your overall quality of life?

<sub>0</sub> Not at all/  
No constant knee pain

<sub>1</sub> Mildly

<sub>2</sub> Moderately

<sub>3</sub> Severely

<sub>4</sub> Extremely

4. In the past week, how frustrated or annoyed have you been by your constant knee pain?

<sub>0</sub> Not at all/  
No constant knee pain

<sub>1</sub> Mildly

<sub>2</sub> Moderately

<sub>3</sub> Severely

<sub>4</sub> Extremely

5. In the past week, how upset or worried have you been by your constant knee pain?

<sub>0</sub> Not at all/  
No constant knee pain

<sub>1</sub> Mildly

<sub>2</sub> Moderately

<sub>3</sub> Severely

<sub>4</sub> Extremely

Version 3: November 19 2007

1

## APPROACH Clinical study protocol- Final version V1.0\_NL

{merge ID here}

## B) PAIN THAT COMES AND GOES

For each of the following questions, please select the response that best describes your knee pain that comes and goes, on average, in the PAST WEEK.

6. In the past week, how intense has your most severe knee pain that comes and goes been?

- |                                                    |                                       |                                       |                                       |                                       |
|----------------------------------------------------|---------------------------------------|---------------------------------------|---------------------------------------|---------------------------------------|
| <input type="checkbox"/> <sub>0</sub>              | <input type="checkbox"/> <sub>1</sub> | <input type="checkbox"/> <sub>2</sub> | <input type="checkbox"/> <sub>3</sub> | <input type="checkbox"/> <sub>4</sub> |
| Not at all/<br>No knee pain that<br>comes and goes | Mildly                                | Moderately                            | Severely                              | Extremely                             |

7. In the past week, how frequently has this knee pain that comes and goes occurred?

- |                                               |                                       |                                       |                                       |                                       |
|-----------------------------------------------|---------------------------------------|---------------------------------------|---------------------------------------|---------------------------------------|
| <input type="checkbox"/> <sub>0</sub>         | <input type="checkbox"/> <sub>1</sub> | <input type="checkbox"/> <sub>2</sub> | <input type="checkbox"/> <sub>3</sub> | <input type="checkbox"/> <sub>4</sub> |
| Never/<br>No knee pain that<br>comes and goes | Rarely                                | Sometimes                             | Often                                 | Very Often                            |

8. In the past week, how much has your knee pain that comes and goes affected your sleep?

- |                                                    |                                       |                                       |                                       |                                       |
|----------------------------------------------------|---------------------------------------|---------------------------------------|---------------------------------------|---------------------------------------|
| <input type="checkbox"/> <sub>0</sub>              | <input type="checkbox"/> <sub>1</sub> | <input type="checkbox"/> <sub>2</sub> | <input type="checkbox"/> <sub>3</sub> | <input type="checkbox"/> <sub>4</sub> |
| Not at all/<br>No knee pain that<br>comes and goes | Mildly                                | Moderately                            | Severely                              | Extremely                             |

9. In the past week, how much has your knee pain that comes and goes affected your overall quality of life?

- |                                                    |                                       |                                       |                                       |                                       |
|----------------------------------------------------|---------------------------------------|---------------------------------------|---------------------------------------|---------------------------------------|
| <input type="checkbox"/> <sub>0</sub>              | <input type="checkbox"/> <sub>1</sub> | <input type="checkbox"/> <sub>2</sub> | <input type="checkbox"/> <sub>3</sub> | <input type="checkbox"/> <sub>4</sub> |
| Not at all/<br>No knee pain that<br>comes and goes | Mildly                                | Moderately                            | Severely                              | Extremely                             |

10. In the past week, how frustrated or annoyed have you been by your knee pain that comes and goes?

- |                                                    |                                       |                                       |                                       |                                       |
|----------------------------------------------------|---------------------------------------|---------------------------------------|---------------------------------------|---------------------------------------|
| <input type="checkbox"/> <sub>0</sub>              | <input type="checkbox"/> <sub>1</sub> | <input type="checkbox"/> <sub>2</sub> | <input type="checkbox"/> <sub>3</sub> | <input type="checkbox"/> <sub>4</sub> |
| Not at all/<br>No knee pain that<br>comes and goes | Mildly                                | Moderately                            | Severely                              | Extremely                             |

11. In the past week, how upset or worried have you been by your knee pain that comes and goes?

- |                                                    |                                       |                                       |                                       |                                       |
|----------------------------------------------------|---------------------------------------|---------------------------------------|---------------------------------------|---------------------------------------|
| <input type="checkbox"/> <sub>0</sub>              | <input type="checkbox"/> <sub>1</sub> | <input type="checkbox"/> <sub>2</sub> | <input type="checkbox"/> <sub>3</sub> | <input type="checkbox"/> <sub>4</sub> |
| Not at all/<br>No knee pain that<br>comes and goes | Mildly                                | Moderately                            | Severely                              | Extremely                             |

THANK YOU!

Version 3: November 19 2007

2

## APPROACH Clinical study protocol- Final version V1.0\_NL

{merge ID here}

## A Measure of Intermittent and Constant Osteoarthritis Pain, ICOAP: HIP Version

People have told us that they experience different kinds of pain (including aching or discomfort) in their hip. To get a better sense of the different types of hip pain you may experience, we would like to ask you about any "constant pain" (pain you have all the time) separately from any pain that you may experience less often, that is, "pain that comes and goes". The following questions will ask you about the pain that you have experienced in your hip in the PAST WEEK. Please answer ALL questions.

## A) CONSTANT PAIN

For each of the following questions, please select the response that best describes, on average, your constant hip pain in the PAST WEEK.

1. In the past week, how intense has your constant hip pain been?

- |                                       |                                       |                                       |                                       |                                       |
|---------------------------------------|---------------------------------------|---------------------------------------|---------------------------------------|---------------------------------------|
| <input type="checkbox"/> <sub>0</sub> | <input type="checkbox"/> <sub>1</sub> | <input type="checkbox"/> <sub>2</sub> | <input type="checkbox"/> <sub>3</sub> | <input type="checkbox"/> <sub>4</sub> |
| Not at all/<br>No constant hip pain   | Mildly                                | Moderately                            | Severely                              | Extremely                             |

2. In the past week, how much has your constant hip pain affected your sleep?

- |                                       |                                       |                                       |                                       |                                       |
|---------------------------------------|---------------------------------------|---------------------------------------|---------------------------------------|---------------------------------------|
| <input type="checkbox"/> <sub>0</sub> | <input type="checkbox"/> <sub>1</sub> | <input type="checkbox"/> <sub>2</sub> | <input type="checkbox"/> <sub>3</sub> | <input type="checkbox"/> <sub>4</sub> |
| Not at all/<br>No constant hip pain   | Mildly                                | Moderately                            | Severely                              | Extremely                             |

3. In the past week, how much has your constant hip pain affected your overall quality of life?

- |                                       |                                       |                                       |                                       |                                       |
|---------------------------------------|---------------------------------------|---------------------------------------|---------------------------------------|---------------------------------------|
| <input type="checkbox"/> <sub>0</sub> | <input type="checkbox"/> <sub>1</sub> | <input type="checkbox"/> <sub>2</sub> | <input type="checkbox"/> <sub>3</sub> | <input type="checkbox"/> <sub>4</sub> |
| Not at all/<br>No constant hip pain   | Mildly                                | Moderately                            | Severely                              | Extremely                             |

4. In the past week, how frustrated or annoyed have you been by your constant hip pain?

- |                                       |                                       |                                       |                                       |                                       |
|---------------------------------------|---------------------------------------|---------------------------------------|---------------------------------------|---------------------------------------|
| <input type="checkbox"/> <sub>0</sub> | <input type="checkbox"/> <sub>1</sub> | <input type="checkbox"/> <sub>2</sub> | <input type="checkbox"/> <sub>3</sub> | <input type="checkbox"/> <sub>4</sub> |
| Not at all/<br>No constant hip pain   | Mildly                                | Moderately                            | Severely                              | Extremely                             |

5. In the past week, how upset or worried have you been by your constant hip pain?

- |                                       |                                       |                                       |                                       |                                       |
|---------------------------------------|---------------------------------------|---------------------------------------|---------------------------------------|---------------------------------------|
| <input type="checkbox"/> <sub>0</sub> | <input type="checkbox"/> <sub>1</sub> | <input type="checkbox"/> <sub>2</sub> | <input type="checkbox"/> <sub>3</sub> | <input type="checkbox"/> <sub>4</sub> |
| Not at all/<br>No constant hip pain   | Mildly                                | Moderately                            | Severely                              | Extremely                             |

## APPROACH Clinical study protocol- Final version V1.0\_NL

{merge ID here}

**B) PAIN THAT COMES AND GOES**

For each of the following questions, please select the response that best describes your hip pain that comes and goes, on average, in the PAST WEEK.

6. In the past week, how intense has your most severe hip pain that comes and goes been?

- |                                                   |                                       |                                       |                                       |                                       |
|---------------------------------------------------|---------------------------------------|---------------------------------------|---------------------------------------|---------------------------------------|
| <input type="checkbox"/> <sub>0</sub>             | <input type="checkbox"/> <sub>1</sub> | <input type="checkbox"/> <sub>2</sub> | <input type="checkbox"/> <sub>3</sub> | <input type="checkbox"/> <sub>4</sub> |
| Not at all/<br>No hip pain that<br>comes and goes | Mildly                                | Moderately                            | Severely                              | Extremely                             |

7. In the past week, how frequently has this hip pain that comes and goes occurred?

- |                                              |                                       |                                       |                                       |                                       |
|----------------------------------------------|---------------------------------------|---------------------------------------|---------------------------------------|---------------------------------------|
| <input type="checkbox"/> <sub>0</sub>        | <input type="checkbox"/> <sub>1</sub> | <input type="checkbox"/> <sub>2</sub> | <input type="checkbox"/> <sub>3</sub> | <input type="checkbox"/> <sub>4</sub> |
| Never/<br>No hip pain that<br>comes and goes | Rarely                                | Sometimes                             | Often                                 | Very Often                            |

8. In the past week, how much has your hip pain that comes and goes affected your sleep?

- |                                                   |                                       |                                       |                                       |                                       |
|---------------------------------------------------|---------------------------------------|---------------------------------------|---------------------------------------|---------------------------------------|
| <input type="checkbox"/> <sub>0</sub>             | <input type="checkbox"/> <sub>1</sub> | <input type="checkbox"/> <sub>2</sub> | <input type="checkbox"/> <sub>3</sub> | <input type="checkbox"/> <sub>4</sub> |
| Not at all/<br>No hip pain that<br>comes and goes | Mildly                                | Moderately                            | Severely                              | Extremely                             |

9. In the past week, how much has your hip pain that comes and goes affected your overall quality of life?

- |                                                   |                                       |                                       |                                       |                                       |
|---------------------------------------------------|---------------------------------------|---------------------------------------|---------------------------------------|---------------------------------------|
| <input type="checkbox"/> <sub>0</sub>             | <input type="checkbox"/> <sub>1</sub> | <input type="checkbox"/> <sub>2</sub> | <input type="checkbox"/> <sub>3</sub> | <input type="checkbox"/> <sub>4</sub> |
| Not at all/<br>No hip pain that<br>comes and goes | Mildly                                | Moderately                            | Severely                              | Extremely                             |

10. In the past week, how frustrated or annoyed have you been by your hip pain that comes and goes?

- |                                                   |                                       |                                       |                                       |                                       |
|---------------------------------------------------|---------------------------------------|---------------------------------------|---------------------------------------|---------------------------------------|
| <input type="checkbox"/> <sub>0</sub>             | <input type="checkbox"/> <sub>1</sub> | <input type="checkbox"/> <sub>2</sub> | <input type="checkbox"/> <sub>3</sub> | <input type="checkbox"/> <sub>4</sub> |
| Not at all/<br>No hip pain that<br>comes and goes | Mildly                                | Moderately                            | Severely                              | Extremely                             |

11. In the past week, how upset or worried have you been by your hip pain that comes and goes?

- |                                                   |                                       |                                       |                                       |                                       |
|---------------------------------------------------|---------------------------------------|---------------------------------------|---------------------------------------|---------------------------------------|
| <input type="checkbox"/> <sub>0</sub>             | <input type="checkbox"/> <sub>1</sub> | <input type="checkbox"/> <sub>2</sub> | <input type="checkbox"/> <sub>3</sub> | <input type="checkbox"/> <sub>4</sub> |
| Not at all/<br>No hip pain that<br>comes and goes | Mildly                                | Moderately                            | Severely                              | Extremely                             |

**THANK YOU!**

Version 3: November 19 2007

2

## APPROACH Clinical study protocol- Final version V1.0\_NL

## FIHOA

Please answer the questions regarding the past 48 hours.

## FIHOA

## FUNCTIONAL INDEX FOR HAND ARTHROPATHIES (FIHOA)

## Scoring system

0: possible without difficulty  
1: possible with slight difficulty  
2: possible with important difficulty  
3: impossible

1. Are you able to turn a key in a lock?  0  1  2  3
2. Are you able to cut meat with a knife?  0  1  2  3
3. Are you able to cut cloth or paper with a pair of scissors?  0  1  2  3
4. Are you able to lift a full bottle with the hand?  0  1  2  3
5. Are you able to clench your fist?  0  1  2  3
6. Are you able to tie a knot?  0  1  2  3
7. *For women* - Are you able to sew?  
*For men* - Are you able to use a screwdriver?  0  1  2  3
8. Are you able to fasten buttons?  0  1  2  3
9. Are you able to write for a long period of time (10 min)?  0  1  2  3
10. Would you accept a handshake without reluctance?  0  1  2  3

Result

## APPROACH Clinical study protocol- Final version V1.0\_NL

**Pain NRS right now in knee, hip, hand, and lower back at screening****Pain NRS (Numeric Rating Scale)  
for lower back, hips, hands and knees**

How severe is your pain right now on the following joints?

Circle the number that Best Describes Your Pain for each joint knowing that 0 means no pain and 10 means very severe pain.

The form is divided into two main sections: 'your LEFT' (light grey background) and 'your RIGHT' (light pink background). In the center is a human silhouette with colored circles indicating the joints: a red circle for the lower back, blue circles for the hands, and green circles for the knees. Each joint has a corresponding horizontal numeric scale from 0 to 10. The scales are color-coded: lower back (red), hands (blue), and knees (green). The scales for the left side are on the left, and for the right side are on the right. A large diagonal watermark 'DO NOT PRINT' is overlaid on the form.

| Joint      | Side  | Scale (0-10)           |
|------------|-------|------------------------|
| LOWER BACK | Left  | 0 1 2 3 4 5 6 7 8 9 10 |
| HAND       | Left  | 0 1 2 3 4 5 6 7 8 9 10 |
| HIP        | Left  | 0 1 2 3 4 5 6 7 8 9 10 |
| KNEE       | Left  | 0 1 2 3 4 5 6 7 8 9 10 |
| LOWER BACK | Right | 0 1 2 3 4 5 6 7 8 9 10 |
| HAND       | Right | 0 1 2 3 4 5 6 7 8 9 10 |
| HIP        | Right | 0 1 2 3 4 5 6 7 8 9 10 |
| KNEE       | Right | 0 1 2 3 4 5 6 7 8 9 10 |

## APPROACH Clinical study protocol- Final version V1.0\_NL

**Pain NRS on the last week in knee, hip, hand, and lower back****Pain NRS (Numeric Rating Scale)  
for lower back, hips, hands and knees**

How severe was your pain during the last week on the following joints?

Circle the number that Best Describes Your Pain for each joint knowing that 0 means no pain and 10 means very severe pain.

The diagram shows a human silhouette with a central vertical line. The left side is labeled 'your LEFT' and the right side is labeled 'your RIGHT'. The joints are labeled as follows: LOWER BACK (red), HAND (blue), HIP (light blue), and KNEE (green). Each joint has a horizontal scale from 0 to 10. The scales are arranged as follows: LOWER BACK (0-10, red), HAND (0-10, blue), HIP (0-10, light blue), and KNEE (0-10, green). The scales are arranged in a grid-like fashion, with the LOWER BACK scale at the top, followed by HAND, HIP, and KNEE. The scales are arranged in a grid-like fashion, with the LOWER BACK scale at the top, followed by HAND, HIP, and KNEE. The scales are arranged in a grid-like fashion, with the LOWER BACK scale at the top, followed by HAND, HIP, and KNEE.



APPROACH Clinical study protocol- Final version V1.0\_NL

Pain DETECT

painDETECT
PAIN QUESTIONNAIRE

Date:  Patient: Last name:  First name:

How would you assess your pain now, at this moment?

|   |   |   |   |   |   |   |   |   |   |    |
|---|---|---|---|---|---|---|---|---|---|----|
| 0 | 1 | 2 | 3 | 4 | 5 | 6 | 7 | 8 | 9 | 10 |
|---|---|---|---|---|---|---|---|---|---|----|

none max.

How strong was the strongest pain during the past 4 weeks?

|   |   |   |   |   |   |   |   |   |   |    |
|---|---|---|---|---|---|---|---|---|---|----|
| 0 | 1 | 2 | 3 | 4 | 5 | 6 | 7 | 8 | 9 | 10 |
|---|---|---|---|---|---|---|---|---|---|----|

none max.

How strong was the pain during the past 4 weeks on average?

|   |   |   |   |   |   |   |   |   |   |    |
|---|---|---|---|---|---|---|---|---|---|----|
| 0 | 1 | 2 | 3 | 4 | 5 | 6 | 7 | 8 | 9 | 10 |
|---|---|---|---|---|---|---|---|---|---|----|

none max.

**Mark the picture that best describes the course of your pain:**

|  |                                          |                          |
|--|------------------------------------------|--------------------------|
|  | Persistent pain with slight fluctuations | <input type="checkbox"/> |
|  | Persistent pain with pain attacks        | <input type="checkbox"/> |
|  | Pain attacks without pain between them   | <input type="checkbox"/> |
|  | Pain attacks with pain between them      | <input type="checkbox"/> |

Please mark your main area of pain

Does your pain radiate to other regions of your body?    yes:     no:

If yes, please draw the direction in which the pain radiates.

**Do you suffer from a burning sensation (e.g., stinging nettles) in the marked areas?**

never     hardly noticed     slightly     moderately     strongly     very strongly

**Do you have a tingling or prickling sensation in the area of your pain (like crawling ants or electrical tingling)?**

never     hardly noticed     slightly     moderately     strongly     very strongly

**Is light touching (clothing, a blanket) in this area painful?**

never     hardly noticed     slightly     moderately     strongly     very strongly

**Do you have sudden pain attacks in the area of your pain, like electric shocks?**

never     hardly noticed     slightly     moderately     strongly     very strongly

**Is cold or heat (bath water) in this area occasionally painful?**

never     hardly noticed     slightly     moderately     strongly     very strongly

**Do you suffer from a sensation of numbness in the areas that you marked?**

never     hardly noticed     slightly     moderately     strongly     very strongly

**Does slight pressure in this area, e.g., with a finger, trigger pain?**

never     hardly noticed     slightly     moderately     strongly     very strongly

(To be filled out by the physician)

|         |                |          |            |          |               |
|---------|----------------|----------|------------|----------|---------------|
| never   | hardly noticed | slightly | moderately | strongly | very strongly |
| x 0 = 0 | x 1 =          | x 2 =    | x 3 =      | x 4 =    | x 5 =         |

Total score  out of 35

R. Freynhagen, R. Baron, U. Gockel, T.R. Tölle, CurrMed Res Opin Vol 22, 2006, 1911-1920    © 2005 Pfizer Pharma GmbH, Pfizerstr.1, 76139 Karlsruhe, Germany  
 f:\institut\ctdbed\project4389\study4389\final\_version\pd-questionr.doc-30/11/2007

APPROACH Clinical study protocol- Final version V1.0\_NL

**painDETECT**
**SCORING OF PAIN QUESTIONNAIRE**

Date:  Patient: Last name:  First name:

Please transfer the total score from the pain questionnaire:

**Total score**

Please add up the following numbers, depending on the marked pain behavior pattern and the pain radiation. Then total up the final score:

|                                                                                   |                                          |                                                                    |               |
|-----------------------------------------------------------------------------------|------------------------------------------|--------------------------------------------------------------------|---------------|
|  | Persistent pain with slight fluctuations | <input style="width: 30px; height: 20px;" type="text" value="0"/>  |               |
|  | Persistent pain with pain attacks        | <input style="width: 30px; height: 20px;" type="text" value="-1"/> | if marked, or |
|  | Pain attacks without pain between them   | <input style="width: 30px; height: 20px;" type="text" value="+1"/> | if marked, or |
|  | Pain attacks with pain between them      | <input style="width: 30px; height: 20px;" type="text" value="+1"/> | if marked     |
|  | Radiating pains?                         | <input style="width: 30px; height: 20px;" type="text" value="+2"/> | if yes        |

**Final score**

### Screening Result

on the presence of a neuropathic pain component

|          |         |          |
|----------|---------|----------|
| negative | unclear | positive |
|----------|---------|----------|

0 1 2 3 4 5 6 7 8 9 10 11 12 13 14 15 16 17 18 19 20 21 22 23 24 25 26 27 28 29 30 31 32 33 34 35 36 37 38

A neuropathic pain component is unlikely (< 10%)

Result is ambiguous, however a neuropathic pain component can be present

A neuropathic pain component is likely (> 90%)

**This sheet does not replace medical diagnostics. It is used for screening the presence of a neuropathic pain component.**




R. Freynhagen, R. Baron, U. Gockel, T.R. Tölle, CurrMed Res Opin Vol 22, 2006, 1911-1920 © 2005 Pfizer Pharma GmbH, Pfizerstr. 1, 76139 Karlsruhe, Germany

f:\institut\cultbedep\project\4389\study\final\_v\m\onlwpd-quasoriq.doc-30/11/2007

---

*APPROACH Clinical study protocol- Final version V1.0\_NL*

---

**SF-36 Health survey**

**Choose one option for each questionnaire item.**

1. In general, would you say your health is:

- 1 - Excellent
  - 2 - Very good
  - 3 - Good
  - 4 - Fair
  - 5 - Poor
- 

2. **Compared to one year ago**, how would you rate your health in general **now**?

- 1 - Much better now than one year ago
  - 2 - Somewhat better now than one year ago
  - 3 - About the same
  - 4 - Somewhat worse now than one year ago
  - 5 - Much worse now than one year ago
- 

DO NOT PRINT

*APPROACH Clinical study protocol- Final version V1.0\_NL*

The following items are about activities you might do during a typical day. Does **your health now limit you** in these activities? If so, how much?

- |                                                                                                            | Yes,<br>limited a<br>lot | Yes,<br>limited a<br>little | No, not<br>limited at<br>all |
|------------------------------------------------------------------------------------------------------------|--------------------------|-----------------------------|------------------------------|
| 3. <b>Vigorous activities</b> , such as running, lifting heavy objects, participating in strenuous sports  | <input type="radio"/> 1  | <input type="radio"/> 2     | <input type="radio"/> 3      |
| 4. <b>Moderate activities</b> , such as moving a table, pushing a vacuum cleaner, bowling, or playing golf | <input type="radio"/> 1  | <input type="radio"/> 2     | <input type="radio"/> 3      |
| 5. Lifting or carrying groceries                                                                           | <input type="radio"/> 1  | <input type="radio"/> 2     | <input type="radio"/> 3      |
| 6. Climbing <b>several</b> flights of stairs                                                               | <input type="radio"/> 1  | <input type="radio"/> 2     | <input type="radio"/> 3      |
| 7. Climbing <b>one</b> flight of stairs                                                                    | <input type="radio"/> 1  | <input type="radio"/> 2     | <input type="radio"/> 3      |
| 8. Bending, kneeling, or stooping                                                                          | <input type="radio"/> 1  | <input type="radio"/> 2     | <input type="radio"/> 3      |
| 9. Walking <b>more than a mile</b>                                                                         | <input type="radio"/> 1  | <input type="radio"/> 2     | <input type="radio"/> 3      |
| 10. Walking <b>several blocks</b>                                                                          | <input type="radio"/> 1  | <input type="radio"/> 2     | <input type="radio"/> 3      |
| 11. Walking <b>one block</b>                                                                               | <input type="radio"/> 1  | <input type="radio"/> 2     | <input type="radio"/> 3      |
| 12. Bathing or dressing yourself                                                                           | <input type="radio"/> 1  | <input type="radio"/> 2     | <input type="radio"/> 3      |

DO NOT PRINT

*APPROACH Clinical study protocol- Final version V1.0\_NL*

During the past 4 weeks, have you had any of the following problems with your work or other regular daily activities as a result of your physical health?

- |                                                                                                | Yes                   | No                    |
|------------------------------------------------------------------------------------------------|-----------------------|-----------------------|
| 13. Cut down the amount of time you spent on work or other activities                          | <input type="radio"/> | <input type="radio"/> |
|                                                                                                | 1                     | 2                     |
| 14. Accomplished less than you would like                                                      | <input type="radio"/> | <input type="radio"/> |
|                                                                                                | 1                     | 2                     |
| 15. Were limited in the kind of work or other activities                                       | <input type="radio"/> | <input type="radio"/> |
|                                                                                                | 1                     | 2                     |
| 16. Had difficulty performing the work or other activities (for example, it took extra effort) | <input type="radio"/> | <input type="radio"/> |
|                                                                                                | 1                     | 2                     |

During the past 4 weeks, have you had any of the following problems with your work or other regular daily activities as a result of any emotional problems (such as feeling depressed or anxious)?

- |                                                                       | Yes                   | No                    |
|-----------------------------------------------------------------------|-----------------------|-----------------------|
| 17. Cut down the amount of time you spent on work or other activities | <input type="radio"/> | <input type="radio"/> |
|                                                                       | 1                     | 2                     |
| 18. Accomplished less than you would like                             | <input type="radio"/> | <input type="radio"/> |
|                                                                       | 1                     | 2                     |
| 19. Didn't do work or other activities as carefully as usual          | <input type="radio"/> | <input type="radio"/> |
|                                                                       | 1                     | 2                     |

20. During the past 4 weeks, to what extent has your physical health or emotional problems interfered with your normal social activities with family, friends, neighbors, or groups?

- 1 - Not at all
- 2 - Slightly
- 3 - Moderately
- 4 - Quite a bit
- 5 - Extremely

---

*APPROACH Clinical study protocol- Final version V1.0\_NL*

---

**21. How much bodily pain have you had during the past 4 weeks?**

- 1 - None
  - 2 - Very mild
  - 3 - Mild
  - 4 - Moderate
  - 5 - Severe
  - 6 - Very severe
- 

**22. During the past 4 weeks, how much did pain interfere with your normal work (including both work outside the home and housework)?**

- 1 - Not at all
  - 2 - A little bit
  - 3 - Moderately
  - 4 - Quite a bit
  - 5 - Extremely
- 

DO NOT PRINT

*APPROACH Clinical study protocol- Final version V1.0\_NL*

These questions are about how you feel and how things have been with you during the past 4 weeks. For each question, please give the one answer that comes closest to the way you have been feeling.

How much of the time during the past 4 weeks...

- |                                                                         | All of<br>the<br>time   | Most<br>of the<br>time  | A good<br>bit of the<br>time | Some<br>of the<br>time  | A little<br>of the<br>time | None<br>of the<br>time  |
|-------------------------------------------------------------------------|-------------------------|-------------------------|------------------------------|-------------------------|----------------------------|-------------------------|
| 23. Did you feel full of pep?                                           | <input type="radio"/> 1 | <input type="radio"/> 2 | <input type="radio"/> 3      | <input type="radio"/> 4 | <input type="radio"/> 5    | <input type="radio"/> 6 |
| 24. Have you been a very nervous person?                                | <input type="radio"/> 1 | <input type="radio"/> 2 | <input type="radio"/> 3      | <input type="radio"/> 4 | <input type="radio"/> 5    | <input type="radio"/> 6 |
| 25. Have you felt so down in the dumps that nothing could cheer you up? | <input type="radio"/> 1 | <input type="radio"/> 2 | <input type="radio"/> 3      | <input type="radio"/> 4 | <input type="radio"/> 5    | <input type="radio"/> 6 |
| 26. Have you felt calm and peaceful?                                    | <input type="radio"/> 1 | <input type="radio"/> 2 | <input type="radio"/> 3      | <input type="radio"/> 4 | <input type="radio"/> 5    | <input type="radio"/> 6 |
| 27. Did you have a lot of energy?                                       | <input type="radio"/> 1 | <input type="radio"/> 2 | <input type="radio"/> 3      | <input type="radio"/> 4 | <input type="radio"/> 5    | <input type="radio"/> 6 |
| 28. Have you felt downhearted and blue?                                 | <input type="radio"/> 1 | <input type="radio"/> 2 | <input type="radio"/> 3      | <input type="radio"/> 4 | <input type="radio"/> 5    | <input type="radio"/> 6 |
| 29. Did you feel worn out?                                              | <input type="radio"/> 1 | <input type="radio"/> 2 | <input type="radio"/> 3      | <input type="radio"/> 4 | <input type="radio"/> 5    | <input type="radio"/> 6 |
| 30. Have you been a happy person?                                       | <input type="radio"/> 1 | <input type="radio"/> 2 | <input type="radio"/> 3      | <input type="radio"/> 4 | <input type="radio"/> 5    | <input type="radio"/> 6 |
| 31. Did you feel tired?                                                 | <input type="radio"/> 1 | <input type="radio"/> 2 | <input type="radio"/> 3      | <input type="radio"/> 4 | <input type="radio"/> 5    | <input type="radio"/> 6 |

32. During the past 4 weeks, how much of the time has your physical health or emotional problems interfered with your social activities (like visiting with friends, relatives, etc.)?

- 1 - All of the time
- 2 - Most of the time
- 3 - Some of the time
- 4 - A little of the time
- 5 - None of the time

---

*APPROACH Clinical study protocol- Final version V1.0\_NL*

---

How TRUE or FALSE is each of the following statements for you.

|                                                          | Definitely true         | Mostly true             | Don't know              | Mostly false            | Definitely false        |
|----------------------------------------------------------|-------------------------|-------------------------|-------------------------|-------------------------|-------------------------|
| 33. I seem to get sick a little easier than other people | <input type="radio"/> 1 | <input type="radio"/> 2 | <input type="radio"/> 3 | <input type="radio"/> 4 | <input type="radio"/> 5 |
| 34. I am as healthy as anybody I know                    | <input type="radio"/> 1 | <input type="radio"/> 2 | <input type="radio"/> 3 | <input type="radio"/> 4 | <input type="radio"/> 5 |
| 35. I expect my health to get worse                      | <input type="radio"/> 1 | <input type="radio"/> 2 | <input type="radio"/> 3 | <input type="radio"/> 4 | <input type="radio"/> 5 |
| 36. My health is excellent                               | <input type="radio"/> 1 | <input type="radio"/> 2 | <input type="radio"/> 3 | <input type="radio"/> 4 | <input type="radio"/> 5 |

DO NOT PRINT



## APPROACH Clinical study protocol- Final version V1.0\_NL

## One month pain diary

STUDY N° CL2-IMIRHU-001

COUNTRY |\_x\_|\_|\_x\_|\_|\_x\_|

CENTRE N° |\_|\_|\_|\_|\_|\_|\_|

PATIENT N° |\_|\_|\_|\_|\_|\_|\_|

VISIT |\_x\_|\_|\_x\_|\_|\_x\_|\_|\_x\_|

## One month pain diary

1-Please, start completing this diary at least 1 month before your next visit to clinical centres (for example, if your next visit is planned on 15<sup>th</sup> November, you need to start to complete this diary on 15<sup>th</sup> October)

2-It is very important to complete it every day at the end of the day. You can put it on a place where it is easy to access, for example on the door of your fridge.

3-My most affected knee is the  right knee  
 left knee

| Starting date of diary completion (DD/MM/YYYY) : __/__/20__ |                                                 |                                 |                                                                         |                                 |                                                                                                           |                                 |
|-------------------------------------------------------------|-------------------------------------------------|---------------------------------|-------------------------------------------------------------------------|---------------------------------|-----------------------------------------------------------------------------------------------------------|---------------------------------|
| Day                                                         | 1. Do you have pain in your most affected knee? |                                 | 2. Did you take painkiller or analgesics* for your most affected knee ? |                                 | 3. Did you take painkiller or analgesics* for other reasons (for example headache, throatache, backache)? |                                 |
| D1                                                          | (1) <input type="checkbox"/> Yes                | (0) <input type="checkbox"/> No | (1) <input type="checkbox"/> Yes                                        | (0) <input type="checkbox"/> No | (1) <input type="checkbox"/> Yes                                                                          | (0) <input type="checkbox"/> No |
| D2                                                          | (1) <input type="checkbox"/> Yes                | (0) <input type="checkbox"/> No | (1) <input type="checkbox"/> Yes                                        | (0) <input type="checkbox"/> No | (1) <input type="checkbox"/> Yes                                                                          | (0) <input type="checkbox"/> No |
| D3                                                          | (1) <input type="checkbox"/> Yes                | (0) <input type="checkbox"/> No | (1) <input type="checkbox"/> Yes                                        | (0) <input type="checkbox"/> No | (1) <input type="checkbox"/> Yes                                                                          | (0) <input type="checkbox"/> No |
| D4                                                          | (1) <input type="checkbox"/> Yes                | (0) <input type="checkbox"/> No | (1) <input type="checkbox"/> Yes                                        | (0) <input type="checkbox"/> No | (1) <input type="checkbox"/> Yes                                                                          | (0) <input type="checkbox"/> No |
| D5                                                          | (1) <input type="checkbox"/> Yes                | (0) <input type="checkbox"/> No | (1) <input type="checkbox"/> Yes                                        | (0) <input type="checkbox"/> No | (1) <input type="checkbox"/> Yes                                                                          | (0) <input type="checkbox"/> No |
| D6                                                          | (1) <input type="checkbox"/> Yes                | (0) <input type="checkbox"/> No | (1) <input type="checkbox"/> Yes                                        | (0) <input type="checkbox"/> No | (1) <input type="checkbox"/> Yes                                                                          | (0) <input type="checkbox"/> No |
| D7                                                          | (1) <input type="checkbox"/> Yes                | (0) <input type="checkbox"/> No | (1) <input type="checkbox"/> Yes                                        | (0) <input type="checkbox"/> No | (1) <input type="checkbox"/> Yes                                                                          | (0) <input type="checkbox"/> No |
| D8                                                          | (1) <input type="checkbox"/> Yes                | (0) <input type="checkbox"/> No | (1) <input type="checkbox"/> Yes                                        | (0) <input type="checkbox"/> No | (1) <input type="checkbox"/> Yes                                                                          | (0) <input type="checkbox"/> No |
| D9                                                          | (1) <input type="checkbox"/> Yes                | (0) <input type="checkbox"/> No | (1) <input type="checkbox"/> Yes                                        | (0) <input type="checkbox"/> No | (1) <input type="checkbox"/> Yes                                                                          | (0) <input type="checkbox"/> No |
| D10                                                         | (1) <input type="checkbox"/> Yes                | (0) <input type="checkbox"/> No | (1) <input type="checkbox"/> Yes                                        | (0) <input type="checkbox"/> No | (1) <input type="checkbox"/> Yes                                                                          | (0) <input type="checkbox"/> No |
| D11                                                         | (1) <input type="checkbox"/> Yes                | (0) <input type="checkbox"/> No | (1) <input type="checkbox"/> Yes                                        | (0) <input type="checkbox"/> No | (1) <input type="checkbox"/> Yes                                                                          | (0) <input type="checkbox"/> No |
| D12                                                         | (1) <input type="checkbox"/> Yes                | (0) <input type="checkbox"/> No | (1) <input type="checkbox"/> Yes                                        | (0) <input type="checkbox"/> No | (1) <input type="checkbox"/> Yes                                                                          | (0) <input type="checkbox"/> No |
| D13                                                         | (1) <input type="checkbox"/> Yes                | (0) <input type="checkbox"/> No | (1) <input type="checkbox"/> Yes                                        | (0) <input type="checkbox"/> No | (1) <input type="checkbox"/> Yes                                                                          | (0) <input type="checkbox"/> No |
| D14                                                         | (1) <input type="checkbox"/> Yes                | (0) <input type="checkbox"/> No | (1) <input type="checkbox"/> Yes                                        | (0) <input type="checkbox"/> No | (1) <input type="checkbox"/> Yes                                                                          | (0) <input type="checkbox"/> No |
| D15                                                         | (1) <input type="checkbox"/> Yes                | (0) <input type="checkbox"/> No | (1) <input type="checkbox"/> Yes                                        | (0) <input type="checkbox"/> No | (1) <input type="checkbox"/> Yes                                                                          | (0) <input type="checkbox"/> No |
| D16                                                         | (1) <input type="checkbox"/> Yes                | (0) <input type="checkbox"/> No | (1) <input type="checkbox"/> Yes                                        | (0) <input type="checkbox"/> No | (1) <input type="checkbox"/> Yes                                                                          | (0) <input type="checkbox"/> No |
| D17                                                         | (1) <input type="checkbox"/> Yes                | (0) <input type="checkbox"/> No | (1) <input type="checkbox"/> Yes                                        | (0) <input type="checkbox"/> No | (1) <input type="checkbox"/> Yes                                                                          | (0) <input type="checkbox"/> No |
| D18                                                         | (1) <input type="checkbox"/> Yes                | (0) <input type="checkbox"/> No | (1) <input type="checkbox"/> Yes                                        | (0) <input type="checkbox"/> No | (1) <input type="checkbox"/> Yes                                                                          | (0) <input type="checkbox"/> No |
| D19                                                         | (1) <input type="checkbox"/> Yes                | (0) <input type="checkbox"/> No | (1) <input type="checkbox"/> Yes                                        | (0) <input type="checkbox"/> No | (1) <input type="checkbox"/> Yes                                                                          | (0) <input type="checkbox"/> No |
| D20                                                         | (1) <input type="checkbox"/> Yes                | (0) <input type="checkbox"/> No | (1) <input type="checkbox"/> Yes                                        | (0) <input type="checkbox"/> No | (1) <input type="checkbox"/> Yes                                                                          | (0) <input type="checkbox"/> No |
| D21                                                         | (1) <input type="checkbox"/> Yes                | (0) <input type="checkbox"/> No | (1) <input type="checkbox"/> Yes                                        | (0) <input type="checkbox"/> No | (1) <input type="checkbox"/> Yes                                                                          | (0) <input type="checkbox"/> No |
| D22                                                         | (1) <input type="checkbox"/> Yes                | (0) <input type="checkbox"/> No | (1) <input type="checkbox"/> Yes                                        | (0) <input type="checkbox"/> No | (1) <input type="checkbox"/> Yes                                                                          | (0) <input type="checkbox"/> No |
| D23                                                         | (1) <input type="checkbox"/> Yes                | (0) <input type="checkbox"/> No | (1) <input type="checkbox"/> Yes                                        | (0) <input type="checkbox"/> No | (1) <input type="checkbox"/> Yes                                                                          | (0) <input type="checkbox"/> No |
| D24                                                         | (1) <input type="checkbox"/> Yes                | (0) <input type="checkbox"/> No | (1) <input type="checkbox"/> Yes                                        | (0) <input type="checkbox"/> No | (1) <input type="checkbox"/> Yes                                                                          | (0) <input type="checkbox"/> No |
| D25                                                         | (1) <input type="checkbox"/> Yes                | (0) <input type="checkbox"/> No | (1) <input type="checkbox"/> Yes                                        | (0) <input type="checkbox"/> No | (1) <input type="checkbox"/> Yes                                                                          | (0) <input type="checkbox"/> No |
| D26                                                         | (1) <input type="checkbox"/> Yes                | (0) <input type="checkbox"/> No | (1) <input type="checkbox"/> Yes                                        | (0) <input type="checkbox"/> No | (1) <input type="checkbox"/> Yes                                                                          | (0) <input type="checkbox"/> No |
| D27                                                         | (1) <input type="checkbox"/> Yes                | (0) <input type="checkbox"/> No | (1) <input type="checkbox"/> Yes                                        | (0) <input type="checkbox"/> No | (1) <input type="checkbox"/> Yes                                                                          | (0) <input type="checkbox"/> No |
| D28                                                         | (1) <input type="checkbox"/> Yes                | (0) <input type="checkbox"/> No | (1) <input type="checkbox"/> Yes                                        | (0) <input type="checkbox"/> No | (1) <input type="checkbox"/> Yes                                                                          | (0) <input type="checkbox"/> No |
| D29                                                         | (1) <input type="checkbox"/> Yes                | (0) <input type="checkbox"/> No | (1) <input type="checkbox"/> Yes                                        | (0) <input type="checkbox"/> No | (1) <input type="checkbox"/> Yes                                                                          | (0) <input type="checkbox"/> No |
| D30                                                         | (1) <input type="checkbox"/> Yes                | (0) <input type="checkbox"/> No | (1) <input type="checkbox"/> Yes                                        | (0) <input type="checkbox"/> No | (1) <input type="checkbox"/> Yes                                                                          | (0) <input type="checkbox"/> No |
| D31                                                         | (1) <input type="checkbox"/> Yes                | (0) <input type="checkbox"/> No | (1) <input type="checkbox"/> Yes                                        | (0) <input type="checkbox"/> No | (1) <input type="checkbox"/> Yes                                                                          | (0) <input type="checkbox"/> No |

\* painkiller or analgesics are treatments to decrease or suppress your pain (pill, tablet, capsule, ampule...)
